# Supplementary material for: Effect of whole-body vibration exercise in preventing falls and fractures: a systematic review and meta-analysis
Source: PubMed Central journal article supplement — BMJ Open. 2017 Dec 29;7(12):e018342. doi: 10.1136/bmjopen-2017-018342 (PMC6027066; doi:10.1136/bmjopen-2017-018342), 2017-12-29
Supplement: bmjopen-2017-018342.draft_revisions.pdf [file bmjopen-2017-018342.draft_revisions.pdf]

# BMJ Open

BMJ Open is committed to open peer review. As part of this commitment we make the peer review history of every article we publish publicly available.

When an article is published we post the peer reviewers' comments and the authors' responses online. We also post the versions of the paper that were used during peer review. These are the versions that the peer review comments apply to.

The versions of the paper that follow are the versions that were submitted during the peer review process. They are not the versions of record or the final published versions. They should not be cited or distributed as the published version of this manuscript.

BMJ Open is an open access journal and the full, final, typeset and author-corrected version of record of the manuscript is available on our site with no access controls, subscription charges or pay-per-view fees (<http://bmjopen.bmj.com>).

If you have any questions on BMJ Open's open peer review process please email [editorial.bmjopen@bmj.com](mailto:editorial.bmjopen@bmj.com)

# BMJ Open

## The Effect Of Whole Body Vibration Exercise In Preventing Falls And Fractures: A Systematic Review And Meta-analysis

|                                 |                                                                                                                                                                                                                                                                                                                                                                                                                                                                                                                                                                                                                                                                                                                                                                                                                                                                                                                                                                                                                                                                             |
|---------------------------------|-----------------------------------------------------------------------------------------------------------------------------------------------------------------------------------------------------------------------------------------------------------------------------------------------------------------------------------------------------------------------------------------------------------------------------------------------------------------------------------------------------------------------------------------------------------------------------------------------------------------------------------------------------------------------------------------------------------------------------------------------------------------------------------------------------------------------------------------------------------------------------------------------------------------------------------------------------------------------------------------------------------------------------------------------------------------------------|
| Journal:                        | <i>BMJ Open</i>                                                                                                                                                                                                                                                                                                                                                                                                                                                                                                                                                                                                                                                                                                                                                                                                                                                                                                                                                                                                                                                             |
| Manuscript ID                   | bmjopen-2017-018342                                                                                                                                                                                                                                                                                                                                                                                                                                                                                                                                                                                                                                                                                                                                                                                                                                                                                                                                                                                                                                                         |
| Article Type:                   | Research                                                                                                                                                                                                                                                                                                                                                                                                                                                                                                                                                                                                                                                                                                                                                                                                                                                                                                                                                                                                                                                                    |
| Date Submitted by the Author:   | 21-Jun-2017                                                                                                                                                                                                                                                                                                                                                                                                                                                                                                                                                                                                                                                                                                                                                                                                                                                                                                                                                                                                                                                                 |
| Complete List of Authors:       | Jepsen, Ditte; Odense Universitetshospital, Department of Geriatric Medicine; Syddansk Universitet Det Sundhedsvidenskabelige Fakultet, Institute of Clinical Research<br>Thomsen , Katja ; Odense Universitetshospital, Department of geriatric medicine; Syddansk Universitet Det Sundhedsvidenskabelige Fakultet, Institute of Clinical Research<br>Hansen, Stinus; Odense Universitetshospital, Department of Endocrinology; Syddansk Universitet Det Sundhedsvidenskabelige Fakultet, Institute of Clinical Research<br>Jørgensen, Niklas; Syddansk Universitet Det Sundhedsvidenskabelige Fakultet, OPEN- Odense Patient data Explorative Network; Rigshospitalet, Department of Clinical Biochemistry<br>Masud, Tahir ; Nottingham University Hospitals NHS Trust, Department of Geriatric Medicine; Syddansk Universitet Det Sundhedsvidenskabelige Fakultet, Institute of Clinical Research<br>Ryg, Jesper; Odense University Hospital, Department of Geriatric Medicine; Syddansk Universitet Det Sundhedsvidenskabelige Fakultet, Institute of Clinical Research |
| <b>Primary Subject Heading</b>: | Geriatric medicine                                                                                                                                                                                                                                                                                                                                                                                                                                                                                                                                                                                                                                                                                                                                                                                                                                                                                                                                                                                                                                                          |
| Secondary Subject Heading:      | Sports and exercise medicine                                                                                                                                                                                                                                                                                                                                                                                                                                                                                                                                                                                                                                                                                                                                                                                                                                                                                                                                                                                                                                                |
| Keywords:                       | Whole-body vibration, WBV, Exercise, Fractures, Accidental falls, Meta-analysis                                                                                                                                                                                                                                                                                                                                                                                                                                                                                                                                                                                                                                                                                                                                                                                                                                                                                                                                                                                             |
|                                 |                                                                                                                                                                                                                                                                                                                                                                                                                                                                                                                                                                                                                                                                                                                                                                                                                                                                                                                                                                                                                                                                             |

SCHOLARONE™  
Manuscripts

1  
2  
3  
4 **The Effect Of Whole Body Vibration Exercise In Preventing Falls And Fractures: A**  
5 **Systematic Review And Meta-analysis**  
6  
7

8  
9 Ditte Beck Jepsen, MD, PhD student<sup>1,2</sup>, Ditte.Beck.Jepsen2@syd.dk

10 Katja Thomsen, MD, PhD, ass. Professor<sup>2,3</sup>, Katja.Thomsen@rsyd.dk

11 Stinus Hansen MD, PhD<sup>2,4</sup>, Stinus.Jorn.Hansen@rsyd.dk

12 Niklas Rye Jørgensen MD, Professor<sup>5,6</sup>, Niklas.Rye.Joergensen@regionh.dk

13 Tahir Masud MD, Professor<sup>1,2,7</sup>, Tahir.Masud@nuh.nhs.uk

14 Jesper Ryg, MD, PhD, ass. Professor<sup>1,2</sup>, Jesper.Ryg@rsyd.dk

15  
16  
17  
18  
19  
20  
21 1: Department of Geriatric Medicine, Odense University Hospital, Denmark

22 2: Institute of Clinical Research, University of Southern Denmark, Denmark

23 3: Department of Geriatric Medicine, Odense University Hospital, Svendborg, Denmark

24 4: Department of Endocrinology, Odense University Hospital, Denmark

25 5: Department of Clinical Biochemistry, Rigshospitalet, Denmark

26 6: OPEN- Odense Patient data Explorative Network, Odense University Hospital/ University of  
27 Southern Denmark

28 7: Department of Geriatric Medicine, Nottingham University Hospitals Trust NHS, United  
29 Kingdom

30  
31  
32  
33  
34  
35  
36  
37  
38  
39 Corresponding author

40 Ditte Beck Jepsen

41  
42  
43  
44 Word count total: 4662

45 Word count abstract: 295

46 Figures: 6

47 Tables: 3

48  
49  
50  
51  
52 Appendix: Search string

53 Supplemental figures: 5  
54  
55  
56  
57  
58  
59  
60

## Abstract

**Objective** - To investigate the effect of Whole Body Vibration exercise (WBV) on fracture risk in adults  $\geq 50$  years of age.

**Design** - A systematic review and meta-analysis calculating relative risk ratios, fall rate ratio, and absolute weighted mean difference using random effects models. Heterogeneity was estimated using  $I^2$  statistics and Cochrane Collaboration's risk of bias tool and the GRADE approach were used to evaluate quality of evidence and summarize conclusions.

**Data sources** - the databases PubMed, EMBASE, and the Cochrane Central Register from inception to April 2016, and reference lists of retrieved publications.

**Eligibility criteria for selecting studies** - randomized controlled trials examining the effect of WBV on fracture risk in adults  $\geq 50$  years of age. The primary outcomes were fractures, fall rates, and the proportion of participants who fell. Secondary outcomes were bone mineral density (BMD), bone microarchitecture, bone turnover markers, and calcaneal broadband attenuation (BUA).

**Results** - 15 papers (14 trials) met the inclusion criteria. Only one study had fracture data reporting a non-significant fracture reduction (RR=0.47, 95% CI 0.14-1.57, p=0.22) (Moderate quality of evidence). Four studies (n=746) showed that WBV reduced the rate of falls with a rate ratio of 0.67 (95% CI 0.50-0.89, p=0.0006;  $I^2=19\%$ ) (moderate quality of evidence). Furthermore, data from three studies (n=805) found a trend towards falls reduction (RR=0.76, 95% CI 0.48-1.20, p=0.24;  $I^2=24\%$ ) (low quality of evidence). Finally moderate to low quality of evidence showed no overall effect on BMD and only sparse data were available regarding microarchitecture parameters, bone turnover markers, and BUA.

**Conclusions** - WBV reduces fall rate, but seems to have no overall effect on BMD or microarchitecture. The impact of WBV on fractures requires further larger adequately powered studies. This meta-analysis suggests that WBV may prevent fractures by reducing falls.

**Systematic review registration** - PROSPERO ID CRD42016036320.

1  
2  
3  
4 Key words:

5 Whole-body vibration, WBV, Exercise, Fractures, Accidental falls, Bone strength, BMD, Meta-  
6 analysis  
7  
8  
9

### 10 11 12 **Strengths and limitations of this study**

- 13 • This is the first systematic review comprehensively conducting a meta-analysis on the effect  
14 of Whole Body Vibration exercise (WBV) on the overall risk of fractures, including falls
- 15 • An extensive systematic literature search identified all available randomised controlled trials  
16 using WBV in adults aged 50 on falls, fractures, and bone parameters
- 17 • A risk of selection bias exists due to no inclusion of non-English language literature, grey  
18 literature, or adverse effects  
19  
20  
21  
22  
23  
24  
25  
26  
27

### 28 **Introduction**

29  
30  
31 Fragility fractures are associated with much morbidity, mortality, and cost to society (1, 2). In  
32 Europe, the direct medical cost of these fractures has been estimated at 31.7 billion Euros per year,  
33 expected to rise to 76.7 billion Euros by 2050 (3). Propensity to fall and osteoporosis are the major  
34 determinants of fragility fractures (1, 4, 5).  
35  
36  
37  
38  
39

40 One third of the population over 65 years of age falls at least once a year (6). Increasing age, frailty,  
41 comorbidity, reduced muscle strength, and impaired balance contribute to the risk of falls (4, 6). In  
42 Europe 22 million women and 5.5 million men were estimated to have osteoporosis in 2010 (1).  
43 WHO criteria for diagnosing osteoporosis is based on measurement of bone mineral density  
44 (BMD), but there are also other important aspects of bone fragility including microarchitecture and  
45 bone turnover (7, 8). The combination of age-related bone loss and an increased risk of falls, cause  
46 a higher incidence of fragility fractures in people aged 50 years or more (1, 9). With an aging  
47 population the increased cost caused by fragility fractures poses a significant challenge to  
48 healthcare systems (1, 3). Reducing fracture risk with the dual approach of lowering fall risk and  
49 enhancing bone strength is therefore desirable (10).  
50  
51  
52  
53  
54  
55  
56  
57  
58  
59  
60

1  
2  
3  
4 Whole body vibration exercise (WBV) has been proposed as an exercise modality anabolic to bone,  
5 capable of enhancing balance, and improving muscle strength (11-14). Animal studies have showed  
6 that mechanical signals introduced via vibration stimulate bone formation and suppress bone  
7 resorption (15-17). The accelerations from vibration platforms are transmitted from the feet to the  
8 adjacent muscles and bones. WBV with high magnitude (high frequency and/or amplitude) has  
9 shown to increase muscular activation and this technique has been suggested as an alternative to  
10 weight bearing exercise (18). Several studies have investigated the role of WBV on BMD, muscle  
11 strength, and balance (11, 12, 14, 19-24). However, the results have been inconsistent perhaps due  
12 to differences in types of vibration studied; intervention designs, populations assessed, and study  
13 quality. Fewer studies have focused on the effect of WBV on falls and bone strength parameters  
14 other than BMD (19, 20, 25-27).  
15  
16  
17  
18  
19  
20  
21  
22

23 Previous systematic reviews on the effect of WBV on balance and muscle strength in older adults  
24 have reported improvement in lower extremity muscle strength or in certain balance measures (28-  
25 32). Systematic reviews focusing on BMD have shown inconsistent results (32-35), with some  
26 showing no overall effect (32), others a small increase in BMD of the hip (33) or no effect on the  
27 hip but an effect on lumbar spine (35), whilst some found a BMD increase in certain subgroups only  
28 (34). To the best of our knowledge no systematic review has comprehensively investigated the role  
29 of WBV on fragility fractures and overall risk of fragility fractures, including falls and bone quality.  
30  
31  
32  
33  
34

35 The objectives of this systematic review were to address if WBV in adults over 50 years of age  
36 could affect the incidence of fractures, falls, as well as estimates of bone mass, architecture and  
37 turnover.  
38  
39  
40

## 41 **Methods**

### 42 **Data sources and searches**

43 Literature searches were conducted in the following electronic bibliographic databases: PubMed,  
44 EMBASE, and The Cochrane Library (Cochrane Central Register of Controlled Trials  
45 (CENTRAL)). The searches were conducted from inception to fourth- of April 2016. Additionally  
46 we performed manual searches of the reference lists of retrieved publications and earlier reviews  
47 (29, 32-35). An updated search was conducted by end of January 2017, to check for any new  
48 relevant studies prior to submission.  
49  
50  
51  
52  
53

54 The search string was structured with librarian assistance using the PICO method: P (population) =  
55 adults  $\geq$ 50 years of age, I (intervention) = whole-body sinusoidal vibration (i.e. constant vibration  
56  
57  
58  
59  
60

1  
2  
3  
4 frequency) from a platform, C (comparison) = no intervention, sham, normal care, or same exercise  
5 in both arms, and O (outcome) = fractures, falls, and bone property parameters.

6  
7 The searches were conducted without filters or restrictions and the search string is available as  
8 appendix 1.  
9

#### 10 11 Study selection

12 One author (DJ) screened title and abstracts. Two authors (DJ, KT) independently evaluated the  
13 full-text papers and eligibility. Conflicts were resolved by a third author (JR). The selection was  
14 conducted using the software Covidence (Covidence systematic review software, Veritas Health  
15 Innovation, Melbourne, Australia) and a standardized eligibility form.  
16

17 Inclusion criteria: randomized controlled trials (RCT) investigating the effect of WBV on fractures,  
18 falls, and bone properties within the population  $\geq 50$  years of age. WBV had to be whole-body  
19 sinusoidal vibration (i.e. constant vibration frequency) from a platform that vibrates vertically or  
20 side alternating, with no restriction on frequency, amplitude, or magnitude. The participants had to  
21 stand during the WBV. The control groups had to have either no intervention, usual care, sham  
22 vibration, activity unlikely to influence bone or fall risk parameters, or exercise or interventions  
23 identical in both arms (where WBV was an add on in one group).  
24

25 Trials were ineligible if non RCT, animal studies, population age  $< 50$  years, non-English language  
26 publications, posters, or conference abstracts, and if vibration was applied locally, by electrical  
27 current, non-standing, with random frequencies, using vibrating insoles, or by ultrasound.  
28

#### 29 30 Data extraction and quality assessment

31 Data was independently extracted by two authors (DJ, KT), using a standardized data extraction  
32 form. For all included studies information was gathered on country of origin, design,  
33 randomization, population, intervention, adherence, analyses per intention to treat (ITT) or per  
34 protocol, and results.  
35

36 Primary outcomes of interest were fractures and falls, and secondary outcomes were bone  
37 parameters including BMD (spine and hip), bone microarchitecture (assessed by high resolution  
38 peripheral quantitative computed tomography (HRpQCT) or bone biopsy), bone turnover markers  
39 (carboxy-terminal collagen crosslink (CTX) (bone resorption) or amino terminal propeptide of type  
40 I collagen (P1NP) (bone formation)), or calcaneal quantitative ultrasound (BUA).  
41

42 Data was extracted from the intervention and control groups, and if the WBV was an add-on to  
43 exercise then the exercise and WBV arm was compared to the exercise arm.  
44  
45  
46  
47  
48  
49  
50  
51  
52  
53  
54  
55  
56  
57  
58  
59  
60

1  
2  
3  
4 The numbers of fractures and the participants contributing with data were extracted in the groups.  
5 Regarding falls, the number of falls, the number of participants who experienced falls, and the  
6 number of participants contributing with data and length of follow-up were extracted. To reduce the  
7 clinical heterogeneity, only falls data from the intervention periods of the studies were extracted.  
8  
9 For BMD, bone turnover markers, microarchitecture parameters, and BUA the absolute mean  
10 difference (with standard deviations) from baseline to follow-up were extracted in the intervention  
11 and control groups.  
12  
13  
14

15  
16  
17 If the data were reported different than stated above, the corresponding authors of the included  
18 studies were contacted in order to acquire the data.  
19

20 The risk of bias for each included study was assessed using the Cochrane 'Risk of bias tool' (36).  
21 The performance biases were divided in patient reported outcomes (falls) and bone property  
22 parameters. The quality of evidence was assessed for each outcome using the five GRADE  
23 considerations and summaries of findings were created using the GRADE guidelines (37).  
24  
25  
26

#### 27 Strategy for data synthesis and analysis

28  
29 The results across studies were pooled by numbers of events calculating relative risk of fractures  
30 and for experiencing one or more falls (fallers) with 95% CI. Fall incident rate ratio per patient year  
31 with 95% CI were calculated using the reported rate of falls (falls per person year) or the rate of  
32 falls in each group were calculated from the total number of falls and the total length of the  
33 intervention duration (person years) for participants contributing with data in each group using  
34 STATA (Stata Statistical Software: Release 14, TX: StataCorp LP). The mean differences in BMD,  
35 bone turnover markers, microarchitecture parameters, and BUA were pooled calculating the  
36 absolute mean difference and 95% CI. The mean differences were calculated subtracting the  
37 baseline means from the follow-up or by multiplying percent change with baseline means. The  
38 standard deviations (SD) were calculated using the formula  $((HCI-LCI/2/TINV(0.05;n-1))*\sqrt{n})$ ,  
39 where HCI is the highest value of 95% CI, LCI the lowest value of 95% CI, and  $n$  the sample size  
40 of the group (36), by using p-values for change over time in Review Manager calculator (RevMan)  
41 (version 5.3, Copenhagen: The Nordic Cochrane Centre, The Cochrane Collaboration 2014), or by  
42 the formula  $SD = ((m_i - m_c) / TINV(p\text{-value}; df)) / \sqrt{(1/n_i + 1/n_c)}$ , where  $m_i$  is the mean difference  
43 in the intervention group,  $m_c$  is the mean difference in the control group,  $df$  is degrees of freedom,  
44  $n_i$  is the sample size in the intervention group, and  $n_c$  is the sample size in the control group (36).  
45  
46  
47  
48  
49  
50  
51  
52  
53  
54  
55  
56  
57  
58  
59  
60  
When cluster randomization was used adjustments were applied (36). The number of participants



1  
2  
3  
4 contributing with data in each group was used for the calculations if this was reported, otherwise the  
5 number of participants randomized to each group was extracted. Where possible the longest follow-  
6 up times were used (with two papers reporting three and six month data, six month data were used)  
7 (26, 27). In case of post hoc study extension, the originally planned duration was used (22).  
8  
9 Calculations were performed using Excel (Microsoft Excel (2010)), and STATA14. To allow for  
10 variability among the participants and interventions, the random effect meta-analysis model in  
11 RevMan was used. Heterogeneity was assessed by forest plots and the I-squared statistics. Pre-  
12 assigned subgroup analyses for sinusoidal vertical and side-alternating WBV were done where  
13 possible.  
14  
15  
16  
17  
18  
19

20 The review protocol was registered 1<sup>st</sup> of April 2016 in PROSPERO (ID:CRD42016036320) and  
21 reported according to the PRISMA 2009 statement, and the checklist was completed (38).  
22  
23

## 24 **Results**

### 25 Study selection and characteristics

26  
27 A total of 3,207 titles and abstracts were initially identified, and after removal of 959 duplicates,  
28 2,248 titles and abstracts were screened for relevance. The majority of identified papers were  
29 excluded because they described animal studies, were not RCTs, or did not meet the definition of  
30 the intervention. A total of 107 full text papers were read and matched to the inclusion and  
31 exclusion criteria. Selection of the included studies is illustrated in the PRISMA flow diagram  
32 (Figure 1). The updated search revealed no new relevant studies.  
33  
34  
35  
36  
37

### 38 Study characteristics

39  
40 A total of 15 papers (14 studies) met the criteria for the qualitative synthesis and are described in  
41 Table 1. The studies were published from 2004 to 2015, with an accumulated population of 1,839  
42 (ranging from 42 (20) to 710 (21) participants in the included studies). The mean age of the overall  
43 population was 74 years, with 82% living independently and 90% being women. All studies were  
44 RCT with one trial using cluster-randomisation (21). The Six studies compared WBV to continued  
45 daily activities (20, 21, 26, 40, 41), with one study using two different forms of WBV (39). Three  
46 studies compared WBV to exercise or wellness therapy (24, 25, 42), and one study compared WBV  
47 to exercise and to continued daily activities (12). Two studies compared WBV to sham (19, 22).  
48 One study compared WBV and high or low dose vitamin D supplementation to no training and high  
49 or low dose vitamin D supplementation (43). One study compared WBV and alendronate to no  
50 training and alendronate (23). Eight trials reported supervised training (19, 20, 25, 26, 39-41, 43),  
51  
52  
53  
54  
55  
56  
57  
58  
59  
60

1  
2  
3  
4 two electronically monitored (21, 22), two using attendance logs (24, 42), and two did not state any  
5 form of measurement of adherence (12, 23).  
6  
7  
8  
9  
10  
11  
12  
13  
14  
15  
16  
17  
18  
19  
20  
21  
22  
23  
24  
25  
26  
27  
28  
29  
30  
31  
32  
33  
34  
35  
36  
37  
38  
39  
40  
41  
42  
43  
44  
45  
46  
47  
48  
49  
50  
51  
52  
53  
54  
55  
56  
57  
58  
59  
60

For peer review only

Table 1. Description of the included studies

| Author and year (ref)                | Design                                                   | Setting                                              | Participants No.   | Women % | Age (mean, SD, range)        | Analysed   | Outcomes of interest                                           | Supervision           |
|--------------------------------------|----------------------------------------------------------|------------------------------------------------------|--------------------|---------|------------------------------|------------|----------------------------------------------------------------|-----------------------|
| Beck 2010 (39)                       | 3-arm RCT<br>LWBV vs. HWBV vs. continue daily activities | Australian independently living postmenopausal women | 47<br>(15, 17, 15) | 100     | 71.5±9.5                     | ITT/PP     | aBMD hip and spine, BUA of calcaneus, falls as adverse effects | yes                   |
| Beudart 2011 / Buckinx 2013 (27, 26) | 2-arm RCT<br>WBV vs. continue daily activities           | Belgium nursing home residents                       | 62<br>(31, 31)     | 76      | 83.2±7.9                     | ITT        | falls                                                          | yes                   |
| Corrie 2014 (19)                     | 3-arm RCT<br>vWBV vs. svWBV vs. sham                     | England referred to Geriatric falls clinic           | 61<br>(21, 20, 20) | 61      | 80.2±6.5                     | ITT        | turnover markers (CTX, P1NP)                                   | yes                   |
| Gomez-Cabello 2013 (40)              | 2-arm RCT<br>WBV vs. continue daily activities           | Spain non-institutionalised elderly                  | 49<br>(24, 25)     | 59      | WBV 75.2±4.7<br>CON 74.8±4.9 | ITT        | aBMD hip and spine, pQCT                                       | yes                   |
| Iwamoto 2004 (23)                    | 2-arm RCT<br>WBV + alendronate vs. alendronate           | Japan osteoporotic women                             | 50<br>(25, 25)     | 100     | 55-88                        | not stated | aBMD spine, falls as adverse effects                           | not stated            |
| Kiel 2015 (22)                       | 2-arm RCT<br>WBV vs. sham                                | North America independently living elderly           | 174<br>(89, 85)    | 67      | 82±7                         | ITT        | vBMD hip and spine, turnover markers (CTX, P1NP)               | electronic monitoring |
| Leung 2014 (21)                      | 2-arm cluster RCT<br>WBV vs. continue daily activities   | China ≥ 60 yr independently living women             | 710<br>(364, 346)  | 100     | 74.5±7.1<br>71.3±7.2         | ITT        | fractures, falls, aBMD hip and spine                           | electronic monitoring |
| Liphardt 2015 (20)                   | 2-arm RCT<br>WBV vs. continue daily activities           | Canada osteopenic women                              | 42<br>(22, 20)     | 100     | 58.5±3.3<br>59.1±4.6         | not stated | HRpQCT, aBMD                                                   | yes                   |
| Santin-Medeiros 2014 (41)            | 2-arm RCT<br>WBV vs. continue daily activities           | Spain women >79 yr                                   | 43<br>(25, 18)     | 100     | 82.4±5.7                     | ITT/PP     | aBMD hip                                                       | yes 9                 |

|    |                                   |                                                                                           |                                                          |                     |     |          |            |                                                  |                    |
|----|-----------------------------------|-------------------------------------------------------------------------------------------|----------------------------------------------------------|---------------------|-----|----------|------------|--------------------------------------------------|--------------------|
| 5  | Sitjà-Rabert 2015<br>(25)         | 2-arm RCT<br>WBV + exercise vs. exercise                                                  | Spain<br>nursing home residents >65<br>yr                | 159<br>(81, 79)     | 67  | 82       | ITT        | falls                                            | yes                |
| 8  | Von Stegel 2011<br>(42)           | 3-arm RCT<br>WBV + exercise vs. exercise vs.<br>wellness therapy                          | Germany<br>women ≥65 yr, living<br>independently         | 151<br>(50, 50, 51) | 100 | 68.5±3.1 | ITT        | falls, aBMD hip and<br>spine                     | attendance<br>list |
| 14 | Von Stegel<br>2011ElvisII<br>(24) | 3-arm RCT<br>vWBV vs. svWBV vs. wellness<br>therapy                                       | Germany<br>women ≥65 yr, living<br>independently         | 108<br>(36, 36, 36) | 100 | 68.5±3.1 | ITT        | aBMD femoral neck<br>and spine                   | attendance<br>logs |
| 18 | Verschueren 2004<br>(12)          | 3-arm RCT<br>WBV vs. exercise vs. no training                                             | Belgium<br>postmenopausal women non<br>institutionalized | 70<br>(25, 22, 23)  | 100 | 58-74    | not stated | aBMD hip and spine,<br>turnover markers<br>(CTX) | not stated         |
| 21 | Verschueren 2011<br>(43)          | 4-arm RCT<br>WBV + HDvit vs. WBV + Dvit vs. no<br>training + HDvit vs. no training + Dvit | Belgium<br>women living in nursing<br>homes              | 113                 | 100 | 79.6     | ITT        | aBMD hip                                         | yes                |

Abbreviations: aBMD = areal bone mineral density, CON = controls, CTX = carboxy-terminal collagen crosslink, Dvit = conventional dose vitamin D, HDvit = high dose vitamin D, HR-pQCT = high resolution peripheral quantitative computed tomography, HWBV = high magnitude whole body vibration, ITT = intent to treat, LWBV = low magnitude whole body vibration, P1NP = amino terminal propeptide of type I collagen, PP = per protocol, pQCT = peripheral quantitative computed tomography, SD = standard deviation, svWBV = side-alternating whole-body vibration, vBMD = volumetric bone mineral density, vWBV = vertical whole-body vibration, WBV = whole body vibration exercise, and yr = years of age

The studies varied in the intervention protocols with differences in vibration design, duration, and follow-up (Table 2). Eleven studies used high magnitude WBV ( $\geq 1$  g in peak acceleration) (HWBV) (12, 19, 20, 23-26, 40-43) with two of these studies comparing vertical with side-alternating vibration and wellness therapy/sham vibration (19, 24). Two studies used low magnitude WBV ( $< 1$  g in peak acceleration) (LWBV) (21-22), and one study compared low magnitude WBV to high magnitude side alternating WBV (39). In the studies using high magnitude WBV five used side-alternating vibration (19, 20, 23, 24, 39) and nine studies used vertical vibration (12, 19, 24, 25, 39-43). Frequencies ranged from 12.5 - 40 Hertz, peak to peak displacement ranged from 0.7-4.2 mm, and peak acceleration from 0.3 - 8 g. The exercises were most often vibration spouts lasting from 15 seconds to 20 minutes, from every day to once a week, and the duration of the intervention were from 6 weeks to 24 months. In two studies the participants used flat soled shoes/gymnastic shoes (12, 24), two studies described the intervention shoeless (19, 26), while the other ten studies did not report a protocol for footwear (Table 2).

Table 2. Intervention parameters in the included studies

| Author and year (ref)                  | Intervention (frequency, peak to peak displacement/ amplitude, peak acceleration) | Vibration type/ device | Protocol exercise                                      | Training time (total vibration per session, training frequency) | Duration | Footwear   |
|----------------------------------------|-----------------------------------------------------------------------------------|------------------------|--------------------------------------------------------|-----------------------------------------------------------------|----------|------------|
| Beck 2010 (39)                         | LWBV 30 Hz, not stated, 0.3 g                                                     | vWBV/ Juvent 1000DMT   | standing full upright no bending                       | 15 min, 2 days/week                                             | 8 months | not stated |
|                                        | HWBV 12.5 Hz, 0-14 mm amplitude, 1 g                                              | svWBV/ Galileo 2000    | knees slightly bent                                    | 6 min, 2 days/week                                              |          |            |
| Beudart 2013/<br>Buckinx 2014 (26, 27) | 30 Hz<br>2 mm amplitude, not stated                                               | vWBV/ Vibrosphere      | standing on two feet knees flexed                      | 75 s, 3 days/week                                               | 6 months | shoeless   |
| Corrie 2014 (19)                       | vWBV 28.4 Hz, 1.3 mm peak-to-peak, 1.5 g                                          | vWBV/ Power plate      | standing with bent knees                               | 6 min, 3 days/week                                              | 12 weeks | shoeless   |
|                                        | svWBV 29.8 Hz, 2.9 mm peak-to-peak, 3.6 g                                         | sv/ Galileo 2000       |                                                        |                                                                 |          |            |
| Gomez-Cabello 2013 (40)                | 40 Hz, 2 mm amplitude, not stated                                                 | vWBV/ Pro5Power plate  | standing with knees slightly bent holding the handrail | 7.5 min, 3 days/week                                            | 11 weeks | not stated |

|                                                          |                                    |                                                                                                   |                                           |                                                                                                                                                             |                           |              |                     |
|----------------------------------------------------------|------------------------------------|---------------------------------------------------------------------------------------------------|-------------------------------------------|-------------------------------------------------------------------------------------------------------------------------------------------------------------|---------------------------|--------------|---------------------|
| 1<br>2<br>3<br>4<br>5<br>6<br>7<br>8<br>9                | Iwamoto 2004<br>(23)               | 20 Hz, 0.7-4.2 mm<br>peak to peak, not<br>stated                                                  | svWBV/<br>Galileo                         | standing with bent knees                                                                                                                                    | 4 min,<br>1 days/week     | 12<br>months | not stated          |
| 10<br>11<br>12<br>13<br>14<br>15<br>16                   | Kiel 2015 (22)                     | 37 Hz, 0.09 mm<br>amplitude, 0.3 g                                                                | vWBV/<br>not stated                       | upright relaxed stand                                                                                                                                       | 10 min,<br>7 days/week    | 24<br>months | not stated          |
| 17<br>18<br>19<br>20<br>21                               | Leung 2014<br>(21)                 | 35 Hz, peak-to-<br>peak < 0.1 mm, 0.3<br>g                                                        | vWBV/<br>not stated                       | upright no without<br>bending knees                                                                                                                         | 20 min,<br>5 days/week    | 18<br>months | not stated          |
| 22<br>23<br>24<br>25<br>26                               | Liphardt 2015<br>(20)              | 20 Hz, 3-4 mm<br>amplitude, not<br>stated                                                         | svWBV/<br>Vibraflex<br>Galileo            | stable position 30<br>degree knee flexion<br>angel                                                                                                          | 10 min,<br>2-3 days/week  | 12<br>months | not stated          |
| 27<br>28<br>29<br>30<br>31                               | Santin-<br>Medeiros<br>2015 (41)   | 20 Hz, 2 mm<br>amplitude, not<br>stated                                                           | vWBV/<br>Fitvibe Excel<br>Pro             | 18 different exercises,<br>squats                                                                                                                           | 6-6.5 min,<br>2 days/week | 8 months     | not stated          |
| 32<br>33<br>34<br>35<br>36<br>37<br>38                   | Sitjà-Rabert<br>2015 (25)          | 30-35 Hz, 2-4 mm<br>amplitude, not<br>stated                                                      | vWBV/<br>Powerplate                       | 30 min static/dynamic<br>exercises                                                                                                                          | 3-6 min,<br>3 days/week   | 6 weeks      | not stated          |
| 39<br>40<br>41<br>42<br>43<br>44<br>45                   | Von Stegel<br>2011 Elvis<br>(42)   | 25-35 Hz, 1.7 mm<br>amplitude, not<br>stated                                                      | vWBV/<br>Vibrafit                         | 45 min dancing, balance<br>and gymnastics and 15<br>min dynamic leg-<br>strengthening with<br>WBV and two at home<br>sessions (20 min) with<br>no vibration | 6 min,<br>2 days/week     | 18<br>months | not stated          |
| 46<br>47<br>48<br>49<br>50<br>51<br>52<br>53<br>54<br>55 | Von Stegel<br>2011 ElvisII<br>(24) | vvWBV, 35 Hz,<br>1.7 mm peak to<br>peak, 8 g<br><br>svWBV 12.5 Hz,<br>12 mm peak-to-<br>peak, 8 g | vWBV/<br>Vibrafit<br><br>svWBV/<br>Qionic | standing position, seven<br>one or two-legged<br>dynamic leg<br>strengthening exercises                                                                     | 10 min,<br>3 days/week    | 18<br>months | flat-soled<br>shoes |
| 56<br>57<br>58<br>59<br>60                               | Verschueren<br>2004 (12)           | 35-40 Hz, 1.7-2.5<br>mm<br>amplitude, 2.28-<br>5.09 g                                             | vWBV/<br>Power plate                      | static and dynamic<br>exercises on the<br>vibration platform                                                                                                | 20 min,<br>3 days/week    | 6 months     | gymnastic<br>shoes  |
|                                                          | Verschueren<br>2011 (43)           | 30-40 Hz, not<br>stated, 1.6-2.2 g.                                                               | vWBV/<br>Power plate                      | static and dynamic<br>exercises on the<br>vibration platform                                                                                                | 12 min,<br>3 days/week    | 6 months     | not stated          |

Abbreviations: g = 9.81 m/s<sup>2</sup>, HWBV = high magnitude vibration, Hz = Hertz, LWBV = low magnitude vibration, min = minutes, mm = millimetre, s = seconds, svWBV = side alternating whole body vibration, and vWBV = vertical whole body vibration.

## Outcomes

One study reported fractures as the primary outcome. A total of six studies reported fall data. Three authors were contacted to obtain data on fall rate (23, 25) and fall risk (42) and this way data were obtained from one trial (25).

Data on bone parameters were reported in percent change, or pre- and post-intervention measurements in eight studies. The corresponding authors were contacted (12, 19-23, 39, 41, 43), and data were obtained this way from three studies (19, 21, 22).

In two studies data were extracted from previous reviews (33, 34), which reported to have primary data available from the authors (12, 23, 41), and in the rest of the studies the outcomes were calculated as described in the method section.

## Risk of biases within studies

The majority of studies were categorized as having a low risk of bias in the randomization with unclear risk of bias in the allocation due to insufficient reporting in half of the studies. The performance bias was categorized as high risk when the participants reported falls and were not blinded to the intervention. One study used wellness therapy in the control group and did not inform the participants of the hypotheses, and was thus considered unclear in the risk of performance bias with respect to falls reporting (42). Non-blinding of participants were categorized as unclear risk of bias when the outcome were bone parameters. The risk of bias in selective reporting was categorized as low risk if the trial reported all stated outcomes in the papers and was conducted before 2005. After 2005 trials had to be registered online at a registry or having published a study protocol reporting the pre-specified outcomes. Figure 2 shows a summary of the risk of bias assessment.

## Fractures

One study reported fractures as a primary outcome (Risk Ratio (RR) 0.48 (95% CI 0.14-1.56), with an intra-cluster correlation coefficient of 0.000 (Figure 3).

## Falls

Four studies reported falls as primary outcome (21, 25, 26, 42). Three studies reported fallers and the number of falls in total in each group during the intervention (21, 25, 26) and one study reported the mean number of falls per participants (42). One study reported no events in the control arm in the six weeks intervention and adjusted rate ratio could not be calculated. Pooling the studies with falls reported as outcomes showed a fall rate ratio of 0.67 (95% CI 0.50-0.89,  $p=0.006$ ,  $I^2=19\%$ ) (Figure 4a) in the intervention groups compared to non-intervention and a relative risk of experiencing falls of 0.76 (95% CI 0.48-1.20,  $p=0.24$ ,  $I^2=24\%$ ) (Figure 4b).

Two trials reported falls as adverse effects (23, 39). A post hoc sensitivity analysis was conducted to assess if the inclusion of these trials would alter the result. In this analysis a fall rate/person years rate ratio of 0.65 (95% CI 0.50-0.85,  $p=0.002$ ,  $I^2=8\%$ ) was found and a relative risk of experiencing falls of 0.67 (95% CI 0.46-0.98,  $p=0.04$ ,  $I^2=13\%$ ) (Supplement data Figure 1 a-b).

### Bone Mineral Density

Seven studies reported data on lumbar spine BMD (12, 21, 23, 24, 39, 40, 42). The results showed no overall effect with a mean difference of 0.00 (95% CI -0.00-0.01,  $p=0.11$ ,  $I^2=22\%$ ) (Figure 5a). Six studies reported data on total hip BMD (12, 21, 40-43) showing similar results with a mean difference of 0.00 (95% CI -0.00-0.01,  $p=0.27$ ,  $I^2=50\%$ ) (Figure 5b). Subgroup analyses with vertical and side-alternation vibration explained 44.5% of the heterogeneity in the lumbar spine BMD, and side-alternation vibration showed a mean difference of 0.01 (95% CI 0.00-0.02,  $p=0.04$ ,  $I^2=0\%$ ) with 117 participants. All studies reporting BMD in total hip used vertical vibration.

One study reported change in total proximal femoral trabecular BMD and change in integral lumbar spine vertebral BMD (22). The results from the originally planned duration of 24 months showed no effect on integral lumbar spine vertebral BMD with a mean difference of 0.00 (95% CI -0.00-0.00) and total femoral trabecular BMD mean difference of 0.00 (95% CI -0.00-0.01) (Supplement data Figure 2 a-b). Two studies reported volumetric BMD (vBMD) of radius and tibia using HR-pQCT (20) or quantitative computed tomography (pQCT) scans (37). The results for the ultradistal site using HR-pQCT and a 4% site in tibia and radius using pQCT were combined in forestplots showing no statistically significant effects with a vBMD tibia mean difference of -0.68 (95% CI -2.29-0.93,  $p=0.41$ ,  $I^2=0$ ) and a vBMD radius mean difference of 1.87 (95% CI -0.62-4.36,  $p=0.30$ ,  $I^2=8$ ) (Figure 5c-d).

### Bone microarchitecture

One study reported measurements of cortical porosity (Ct.Po) and trabecular BMD (tbBMD) (20) using HR-pQCT. We refrained from performing a meta-analysis due to the limited data (see Supplement data Figure 3). In tibia, WBV compared to control showed an increase in mean difference in Ct.Po of 0.20 % (95% CI -0.25-0.65) and decrease in tbBMD mean difference -0.3 mg HA/cm<sup>3</sup> (95% CI -0.58-0.02). In radius, WBV compared to no intervention showed an increase mean difference in Ct.Po of 0.10 % (95% CI -0.15-0.35) and decrease in tbBMD mean difference -0.90 mg HA/cm<sup>3</sup> (95% CI -0.90-2.10) (Supplement data Figure 3).

### Bone turnover markers

One study reported data on the bone resorption marker CTX (12) and two studies on both CTX and the bone formation marker P1NP (19, 22). One of the studies reported log transformed CTX and P1NP (19) and no



untransformed data could be obtained from the authors. The result for the meta-analysis on CTX was a mean difference of 0.01 ng/mL (95% CI -0.06-0.08,  $p=0.73$ ,  $I^2=0$ ) and with data available from only one trial the result for P1NP was a mean difference of 4.92 ng/mL (95% CI -3.06-12.90) (Figure 6a-b).

### Calcaneal BUA

A single study reported calcaneal BUA mean change in comparing two vibration groups with a control group (39), we refrained from performing a meta-analysis due to the limited data (see Supplement data Figure 4). The low magnitude vertical vibration group had a mean difference of 1.99 dB/MHz (95% CI -0.84- 4.82) and the high magnitude side-altering vibration group a mean change of 4.69 dB/MHz (95% CI 1.61-7.77) compared to the controls (Supplement data Figure 4).

### Quality assesment

Quality of evidence was assessed for each outcome (Table 3). For the outcome of fractures the evidence was downgraded for imprecision due to the 95% confidence interval around the pooled estimate of effect includes both the possibility of no effect and appreciable benefit. The evidence for falls rate was downgraded for study limitations due to non-blinding of the participants. The risk of falls was downgraded for imprecision and study limitations due to non-blinding of the participants. Bone parameters were all downgraded for indirectness since they are surrogate markers for bone strength. Regarding bone parameters the outcomes were downgraded for imprecision if the 95% confidence interval around the pooled estimate of effect includes both the possibility of no effect and appreciable benefit and for inconsistency if the  $I^2$  statistics showed substantial heterogeneity. Publication bias could not be assessed by a funnel plot with Egger's test since all of the meta-analyses contained less than 10 studies (36).

**Table 3.** Summary of findings table presents the findings and the quality of each outcome using the GRADE considerations

### WBV compared to usual care for fracture risk

#### Bibliography:

| Outcomes | N <sub>2</sub> of participants (studies) Follow-up | Quality of the evidence (GRADE) | Relative effect (95% CI) | Anticipated absolute effects |                          |
|----------|----------------------------------------------------|---------------------------------|--------------------------|------------------------------|--------------------------|
|          |                                                    |                                 |                          | Risk with usual care         | Risk difference with WBV |
|          |                                                    |                                 |                          |                              |                          |

## WBV compared to usual care for fracture risk

### Bibliography:

| Outcomes                                            | № of participants (studies)<br>Follow-up | Quality of the evidence (GRADE) | Relative effect (95% CI)              | Anticipated absolute effects |                                                        |
|-----------------------------------------------------|------------------------------------------|---------------------------------|---------------------------------------|------------------------------|--------------------------------------------------------|
|                                                     |                                          |                                 |                                       | Risk with usual care         | Risk difference with WBV                               |
| fractures                                           | 710<br>(1 RCT)                           | ⊕⊕⊕○<br>MODERATE <sup>a</sup>   | <b>RR 0.48</b><br>(0.14-1.56)         | 2 per 100                    | <b>1 fewer per 100</b><br>(2 fewer to 1 more)          |
| fall rate/person years                              | 746<br>(3 RCTs)                          | ⊕⊕⊕○<br>MODERATE <sup>b</sup>   | <b>Rate ratio 0.67</b><br>(0.50-0.89) | 34 per 100                   | <b>11 fewer per 100</b><br>(17 fewer to 4 fewer)       |
| The risk of experiencing falls (fallers)            | 805<br>(3 RCTs)                          | ⊕⊕○○<br>LOW <sup>c</sup>        | <b>RR 0.76</b><br>(0.48-1.20)         | 23 per 100                   | <b>6 fewer per 100</b><br>(12 fewer to 5 more)         |
| Total bone mineral density lumbar spine (BMD spine) | 911<br>(7 RCTs)                          | ⊕⊕⊕○<br>MODERATE <sup>d</sup>   | -                                     |                              | mean <b>0</b><br>(0 to 0.01 higher)                    |
| Bone mineral density total hip (BMD hip)            | 870<br>(6 RCTs)                          | ⊕⊕○○<br>LOW <sup>e</sup>        | -                                     |                              | mean <b>0</b><br>(0 to 0.01 higher)                    |
| Volumetric bone mineral density tibia               | 80<br>(2 RCTs)                           | ⊕⊕○○<br>LOW <sup>f</sup>        | -                                     |                              | mean <b>0.68 lower</b><br>(2.29 lower to 0.93 higher)  |
| Volumetric bone mineral density radius              | 80<br>(2 RCTs)                           | ⊕○○○<br>VERY LOW <sup>g</sup>   | -                                     |                              | mean <b>1.87 higher</b><br>(0.62 lower to 4.36 higher) |

## WBV compared to usual care for fracture risk

### Bibliography:

| Outcomes                                 | № of participants (studies) Follow-up | Quality of the evidence (GRADE) | Relative effect (95% CI) | Anticipated absolute effects |                                                         |
|------------------------------------------|---------------------------------------|---------------------------------|--------------------------|------------------------------|---------------------------------------------------------|
|                                          |                                       |                                 |                          | Risk with usual care         | Risk difference with WBV                                |
| Serum biomarker of bone resorption (CTX) | 138 (2 RCTs)                          | ⊕⊕○○<br>LOW <sup>f</sup>        | -                        |                              | mean <b>0.01 higher</b><br>(-0.06 lower to 0.08 higher) |
| Serum biomarker of bone formation (P1NP) | 118 (1 RCT)                           | ⊕⊕○○<br>LOW <sup>f</sup>        | -                        |                              | mean <b>4.92 higher</b><br>(3.06 lower to 12.9 higher)  |

\*The risk in the intervention group (and its 95% confidence interval) is based on the assumed risk in the comparison group and the **relative effect** of the intervention (and its 95% CI).

CI: Confidence interval; RR: Risk ratio

### GRADE Working Group grades of evidence

**High quality:** We are very confident that the true effect lies close to that of the estimate of the effect

**Moderate quality:** We are moderately confident in the effect estimate: The true effect is likely to be close to the estimate of the effect, but there is a possibility that it is substantially different

**Low quality:** Our confidence in the effect estimate is limited: The true effect may be substantially different from the estimate of the effect

**Very low quality:** We have very little confidence in the effect estimate: The true effect is likely to be substantially different from the estimate of effect

a. serious imprecision, due to the 95% confidence interval around the estimate of effect includes both the possibility of no effect and appreciable benefit.

b. serious study limitations- lack of blinding of the participants reporting falls.

c. serious study limitations- lack of blinding of the participants reporting fall, and serious imprecision, due to the 95% confidence interval around the pooled estimate of effect includes both the possibility of no effect and appreciable benefit.

d. indirectness (surrogate marker for bone strength).

e. indirectness, and statistical heterogeneity

f. indirectness, and imprecision due to the 95% confidence interval around the estimate of effect includes both the possibility of no effect and appreciable benefit.

g. indirectness, and imprecision due to the 95% confidence interval around the estimate of effect includes both the possibility of no effect and appreciable benefit and statistical heterogeneity.

## Discussion

This systematic review and meta-analysis provides evidence that whole-body vibration exercise reduces fall rate in adults above 50 years of age. We found a tendency in reduction of the proportion of fallers, no overall effect on BMD whereas only sparse data were available regarding bone microarchitecture parameters, bone turnover markers, and BUA. One study reported fractures showing non-significant fracture reduction.

### Strengths and limitations

This study had some limitations. By not including non-English language literature and not extracting data from grey literature or adverse effects the risk of selection bias exists. Looking at the studies reporting falls as adverse effects in the included studies, the WBV reduces the falls rate and risk in agreement with our findings.

Only one study had fractures as primary outcome and had a low fracture rate (21). The studies contributing with falls data were unblinded which could be important when reporting falls. However, all studies included in the primary falls analysis did record falls prospectively limiting the risk of recall bias (21, 25, 26, 42). The populations in the studies consisted of 82% community dwelling adults with 90% being female, making the results generalizable only to people with similar characteristics.

Strengths of this review include that the evidence is obtained from randomized controlled trials, followed the PRISMA guidelines of reporting, and was registered at PROSPERO to improve transparency. A thorough literature search was conducted with assistance from a research librarian and we furthermore performed a hand search of the reference lists of included papers and earlier reviews references (28, 29, 32-35). The risk of selection bias was reduced by having two independent reviewers select the papers and extract the data. In the systematic review all outcomes were assessed regarding quality using the GRADE guidelines where fracture is classified as a critical outcome (37). We classified falls as an important outcome, and bone parameters being of limited importance as surrogate makers for fracture risk (37). We only pooled homogeneous outcomes in the meta-analysis leading to low statistical heterogeneity in the falls analysis with moderate statistical heterogeneity regarding BMD of the hip and spine. Pre-assigned subgroup analysis for vertical vs. side-alternating vibration could explain 44.5% of the heterogeneity in the lumbar spine analysis, whereas regarding total hip BMD all studies used vertical vibration and no subgroup analysis was performed. Meta-regression analysis was not performed due to the insufficient number of studies in the analysis (36).

### Comparisons with other studies and reviews

Prior reviews of exercise have shown that exercise programs designed to prevent falls in older adults also seem to prevent injuries caused by falls, including fractures (44, 45). The majority of these exercise

1 programs included balance training, functional training, and strengthening exercises. Earlier reviews have  
2 shown that WBV have balance improving capabilities and the ability to improve muscle strength of the  
3 lower extremities (27-31), and WBV might thus prevent fractures by its fall reducing capacity or by  
4 lowering the impact of a fall.  
5

6 Our meta-analysis shows that rate of falls can be reduced, and suggests a reduction in the proportion of  
7 fallers. The number needed to treat to prevent one fall was 11 (Table 3). Sustaining a fall increases the risk  
8 of injury, and reducing the number of times an individual falls, even if not the number of fallers may have  
9 clinical and economic relevance to the individual and to society. Falls are very prevalent among the aging  
10 population with one in every three 65+ year olds experiencing a fall every year (6). Due to an ageing  
11 population a focus on interventions capable of reducing falls seems of utmost importance (10). Prior  
12 systematic reviews have shown that other exercise programmes can reduce fall rate through muscle strength  
13 and balance training, and it has been found that exercising for a period of more than three hours per week is  
14 associated with a larger decrease in fall rate (46). WBV exercise consists of shorter workouts and with the  
15 ability to stand as the only requirement for physical function. To our knowledge this is the first meta-  
16 analysis conducted on WBV and falls but earlier findings of a positive effect on surrogate markers for falls  
17 (balance and muscle strength) (27-31) can be viewed as an improvement in important risk factors for falls in  
18 agreement with our findings.  
19

20 Our results on BMD are consistent with other systematic reviews, showing no overall effect on BMD (31-  
21 34). Earlier reviews suggested a positive effect on BMD in adolescents (32) and in a subgroup analysis with  
22 improvements after low-magnitude WBV on lumbar spine BMD (33) and high magnitude WBV on total hip  
23 BMD (32). We found a similar but small effect of side alternating vibration on lumbar spine BMD. In  
24 contrast to others, this systematic review also comprehensively assessed other bone parameters i.e. bone  
25 microarchitecture, turnover markers, and BUA. We found one study assessing cortical porosity and  
26 trabecular BMD of tibia and radius (20) with no overall effect, which is in line with results found in a  
27 younger age group (47). We found no effect on bone resorption markers in line with studies in younger  
28 participants (48, 49). One study in this review had a positive effect in bone formation markers, but with  
29 logarithmic transformed data it could not be pooled with non-transformed data (19) (Supplement data Figure  
30 5). One study looked at BUA of the calcaneus showing a positive effect (39) in conflict with earlier findings  
31 from younger participants (47). Animal data suggest an effect of WBV on bone strength (15-18), but the  
32 same effect in humans is not evident. Reasons for this include diversities in training protocols, duration,  
33 adherence, damping of the vibration by the use of shoes, and different standing positions on the vibration  
34 plates.  
35

36 In summary, the the evidence from this systematic review indicate that WBV may reduce fall rate with  
37 moderate certainty, and the risk of falls with low certainty. Future trials could enhance the certainty by  
38 systematically reporting falls when monitoring adverse effects, and if possible by blinding participants. The  
39  
40  
41  
42  
43  
44  
45  
46  
47  
48  
49  
50  
51  
52  
53  
54  
55  
56  
57  
58  
59  
60

1 quality of evidence for the effect on bone parameters is moderate to low, partly since they are surrogate  
2 markers of fracture risk and future research should focus on the critical outcome fractures with larger trial  
3 sizes and adequate follow-up.  
4  
5  
6

## 7 **Conclusion**

8  
9  
10 In conclusion, our data shows a reduced rate of falls by WBV. Only one study reported fractures showing a  
11 non-significant reduction. We found no effect on BMD, and the data on microarchitecture and bone turnover  
12 markers were sparse. WBV exercise could be implemented in current falls prevention guidelines. It might  
13 potentially reduce fractures by reducing falls but the impact on fractures needs further larger adequately  
14 powered studies.  
15  
16  
17  
18  
19

## 20 **Funding**

21 This study was supported by funding from the Odense University Hospital, The Region of Southern  
22 Denmark Ph.D. foundation, the Faculty of Health Sciences, University of Southern Denmark.  
23  
24  
25  
26  
27

## 28 **Conflict of interest**

29 All authors have completed the ICMJE uniform disclosure form at and declare no conflict of interests. DJ  
30 has received research grants from the Odense University Hospital, The Region of Southern Denmark Ph.D.  
31 foundation, the Faculty of Health Sciences, University of Southern Denmark, and the Danish Osteoporosis  
32 Foundation. The funding parties have no influence on the study design, study conduct, results, or  
33 dissemination.  
34  
35  
36  
37  
38  
39

## 40 **Author contributions**

41 All authors helped in the conception and design of the work and interpretation of data. Three authors  
42 reviewed the papers (DJ, KT, and JR) and two authors extracted the data (DJ, KT). DJ, TM, and JR did the  
43 first draft and all authors revised it critically for important intellectual content. All authors approved the final  
44 version for publication. DJ is guarantor.  
45  
46  
47  
48  
49

## 50 **Data sharing statement**

51 No additional data are available.  
52  
53  
54

## 55 **Acknowledgments**

56 We would like to thank associate professor Carsten Bogh Juhl for extensive help and support in performing  
57 the statistical analyses and research librarian PhD Mette Brandt Eriksen for the help with the literature  
58  
59  
60

1  
2  
3  
4  
5  
6  
7  
8  
9  
10  
11  
12  
13  
14  
15  
16  
17  
18  
19  
20  
21  
22  
23  
24  
25  
26  
27  
28  
29  
30  
31  
32  
33  
34  
35  
36  
37  
38  
39  
40  
41  
42  
43  
44  
45  
46  
47  
48  
49  
50  
51  
52  
53  
54  
55  
56  
57  
58  
59  
60

searches. We would also like to acknowledge Professor Dr. Douglas P. Kiel, PhD Mercè Sitjà-Rabert, and Dr. Katherine Brooke-Wavell for sending us the data from their studies and the grant from the National Institute on Aging (R01 AG025489) which generated the data from the VIBES trial .

For peer review only

## References

1. Hernlund E, Svedbom A, Ivergard M, Compston J, Cooper C, Stenmark J, et al. Osteoporosis in the European Union: medical management, epidemiology and economic burden. A report prepared in collaboration with the International Osteoporosis Foundation (IOF) and the European Federation of Pharmaceutical Industry Associations (EFPIA). *Archives of osteoporosis*. 2013;8:136.
2. Johnell O, Kanis JA. An estimate of the worldwide prevalence and disability associated with osteoporotic fractures. *Osteoporos International* . 2006;17(12):1726-33.
3. Kanis JA, Johnell O. Requirements for DXA for the management of osteoporosis in Europe. *Osteoporos International* . 2005;16(3):229-38.
4. Tinetti ME, Doucette J, Claus E, Marottoli R. Risk factors for serious injury during falls by older persons in the community. *Journal of the American Geriatrics Society*. 1995;43(11):1214-21.
5. Cummings SR, Nevitt MC. Non-skeletal determinants of fractures: the potential importance of the mechanics of falls. Study of Osteoporotic Fractures Research Group. *Osteoporos International* . 1994;4 Suppl 1:67-70.
6. Blake AJ, Morgan K, Bendall MJ et al. Falls by elderly people at home: prevalence and associated factors. *Age Aging*1988; Nov 17(6): 365-72. -5.
7. Boutroy S, Khosla S, Sornay-Rendu E, Zanchetta MB, McMahon DJ, Zhang CA, et al. Microarchitecture and Peripheral BMD are Impaired in Postmenopausal White Women With Fracture Independently of Total Hip T-Score: An International Multicenter Study. *Journal of Bone and Mineral Research*. 2016;31(6):1158-66.
8. Vasikaran S, Eastell R, Bruyere O, Foldes AJ, Garnero P, Griesmacher A, et al. Markers of bone turnover for the prediction of fracture risk and monitoring of osteoporosis treatment: a need for international reference standards. *Osteoporos International* . 2011;22(2):391-420.
9. Curtis EM, van der Velde R, Moon RJ, van den Bergh JP, Geusens P, de Vries F, et al. Epidemiology of fractures in the United Kingdom 1988-2012: Variation with age, sex, geography, ethnicity and socioeconomic status. *Bone*. 2016;87:19-26.
10. Blain H, Masud T, Dargent-Molina P, Martin FC, Rosendahl E, van der Velde N, et al. A Comprehensive Fracture Prevention Strategy in Older Adults: The European Union Geriatric Medicine Society (EUGMS) Statement. *The journal of nutrition, health & aging*. 2016;20(6):647-52.
11. Bogaerts A, Delecluse C, Claessens AL, Coudyzer W, Boonen S, Verschueren SM. Impact of whole-body vibration training versus fitness training on muscle strength and muscle mass in older men: a 1-year randomized controlled trial. *The journals of gerontology Series A, Biological sciences and medical sciences*. 2007;62(6):630-5.
12. Verschueren SMP, Roelants M, Delecluse C, Swinnen S, Vanderschueren D, Boonen S. Effect of 6-month whole body vibration training on hip density, muscle strength, and postural control in postmenopausal women: A randomized controlled pilot study. *Journal of Bone and Mineral Research*. 2004;19(3):352-9.
13. Gusi N, Raimundo A, Leal A. Low-frequency vibratory exercise reduces the risk of bone fracture more than walking: a randomized controlled trial. *BMC musculoskeletal disorders*. 2006;7:92.
14. Cheung WH, Mok HW, Qin L, Sze PC, Lee KM, Leung KS. High-frequency whole-body vibration improves balancing ability in elderly women. *Arch Phys Med Rehabil*. 2007;88(7):852-7.
15. Rubin C, Turner AS, Bain S, Mallinckrodt C, McLeod K. Anabolism. Low mechanical signals strengthen long bones. *Nature*. 2001;412(6847):603-4.
16. Rubin C, Turner AS, Mallinckrodt C, Jerome C, McLeod K, Bain S. Mechanical strain, induced noninvasively in the high-frequency domain, is anabolic to cancellous bone, but not cortical bone. *Bone*. 2002;30(3):445-52.
17. Pichler K, Loreto C, Leonardi R, Reuber T, Weinberg AM, Musumeci G. RANKL is downregulated in bone cells by physical activity (treadmill and vibration stimulation training) in rat with glucocorticoid-induced osteoporosis. *Histology and histopathology*. 2013;28(9):1185-96.
18. Pollock RD, Woledge RC, Mills KR, Martin FC, Newham DJ. Muscle activity and acceleration during whole body vibration: effect of frequency and amplitude. *Clinical biomechanics (Bristol, Avon)*. 2010;25(8):840-6.



19. Corrie H, Brooke-Wavell K, Mansfield NJ, Cowley A, Morris R, Masud T. Effects of vertical and side-alternating vibration training on fall risk factors and bone turnover in older people at risk of falls. *Age Ageing*. 2015;44(1):115-22.
20. Liphardt AM, Schipilow J, Hanley DA, Boyd SK. Bone quality in osteopenic postmenopausal women is not improved after 12 months of whole-body vibration training. *Osteoporosis International*. 2015; 26(3):[911-20 pp.]
21. Leung KS, Li CY, Tse YK, Choy TK, Leung PC, Hung VWY, et al. Effects of 18-month low-magnitude high-frequency vibration on fall rate and fracture risks in 710 community elderly - A cluster-randomized controlled trial. *Osteoporosis International*. 2014;25(6):1785-95.
22. Kiel DP, Hannan MT, Barton BA, Bouxsein ML, Sisson E, Lang T, et al. Low-Magnitude Mechanical Stimulation to Improve Bone Density in Persons of Advanced Age: A Randomized, Placebo-Controlled Trial. *Journal of Bone and Mineral Research* 2015; 30(7):[1319-28 pp.]
23. Iwamoto J, Takeda T, Sato Y, Uzawa M. Effect of whole-body vibration exercise on lumbar bone mineral density, bone turnover, and chronic back pain in post-menopausal osteoporotic women treated with alendronate. *Aging Clin Exp Res*. 2004; 17(2):[157-63 pp.]
24. Stengel S, Kemmler W, Bebenek M, Engelke K, Kalender WA. Effects of whole-body vibration training on different devices on bone mineral density. *Medicine & Science in Sports & Exercise*. 2011; 43(6):[1071-9 pp.].
25. Sitjà-Rabert M, Martínez-Zapata MJ, Fort Vanmeerhaeghe A, Rey Abella F, Romero-Rodríguez D, Bonfill X. Effects of a whole body vibration (WBV) exercise intervention for institutionalized older people: a randomized, multicentre, parallel, clinical trial. *Journal of the American Medical Directors Association*. 2015; 16(2):[125-31 pp.].
26. Buckinx F, Beaudart C, Maquet D, Demonceau M, Crielaard JM, Reginster JY, et al. Evaluation of the impact of 6-month training by whole body vibration on the risk of falls among nursing home residents, observed over a 12-month period: a single blind, randomized controlled trial *Aging Clin Exp Res*. 2014; 26(4):[369-76 pp.].
27. Beaudart C, Maquet D, Mannarino M, Buckinx F, Demonceau M, Crielaard JM, et al. Effects of 3 months of short sessions of controlled whole body vibrations on the risk of falls among nursing home residents. *BMC geriatrics*. 2013;13:42
28. Lam FM, Lau RW, Chung RC, Pang MY. The effect of whole body vibration on balance, mobility and falls in older adults: a systematic review and meta-analysis. *Maturitas*. 2012;72(3):206-13.
29. Sitja-Rabert M, Rigau D, Fort Vanmeerghaeghe A, Romero-Rodríguez D, Bonastre Subirana M, Bonfill X. Efficacy of whole body vibration exercise in older people: a systematic review. *Disability and rehabilitation*. 2012;34(11):883-93.
30. Orr R. The effect of whole body vibration exposure on balance and functional mobility in older adults: a systematic review and meta-analysis. *Maturitas*. 2015;80(4):342-58.
31. Rogan S, de Bruin ED, Radlinger L, Joehr C, Wyss C, Stuck NJ, et al. Effects of whole-body vibration on proxies of muscle strength in old adults: a systematic review and meta-analysis on the role of physical capacity level. *European review of aging and physical activity : official journal of the European Group for Research into Elderly and Physical Activity*. 2015;12:12.
32. Lau RW, Liao LR, Yu F, Teo T, Chung RC, Pang MY. The effects of whole body vibration therapy on bone mineral density and leg muscle strength in older adults: a systematic review and meta-analysis. *Clinical rehabilitation*. 2011;25(11):975-88.
33. Slatkowska L, Alibhai SM, Beyene J, Cheung AM. Effect of whole-body vibration on BMD: a systematic review and meta-analysis. *Osteoporosis International* . 2010;21(12):1969-80.
34. Oliveira LC, Oliveira RG, Pires-Oliveira DA. Effects of whole body vibration on bone mineral density in postmenopausal women: a systematic review and meta-analysis. *Osteoporosis International* . 2016;27(10):2913-33.
35. Ma C, Liu A, Sun M, Zhu H, Wu H. Effect of whole-body vibration on reduction of bone loss and fall prevention in postmenopausal women: a meta-analysis and systematic review. *Journal of orthopaedic surgery and research*. 2016;11:24.
36. Higgins JPT GSe. *Cochrane Handbook for Systematic Reviews of Interventions Version 5.1.0* [updated March 2011].

- 1 37 Schünemann H BJ, Guyatt G, Oxman A GRADE handbook for grading quality of evidence  
2 and strength of recommendations Updated October 2013. The GRADE Working Group,  
3 38. Moher D, Liberati A, Tetzlaff J, Altman DG. Preferred reporting items for systematic reviews  
4 and meta-analyses: the PRISMA statement. *Journal of clinical epidemiology*. 2009;62(10):1006-12.  
5 39. Beck BR, Norling TL. The effect of 8 mos of twice-weekly low- or higher intensity whole  
6 body vibration on risk factors for postmenopausal hip fracture. *American journal of physical medicine &*  
7 *rehabilitation*. 2010; 89(12):[997-1009 pp.].  
8 40. Gomez-Cabello A, Gonzalez-Aguero A, Morales S, Ara I, Casajus JA, Vicente-Rodriguez G.  
9 Effects of a short-term whole body vibration intervention on bone mass and structure in elderly people. *J Sci*  
10 *Med Sport*. 2014;17(2):160-4.  
11 41. Santin-Medeiros F, Santos-Lozano A, Rey-Lopez JP, Vallejo NG. Effects of eight months of  
12 whole body vibration training on hip bone mass in older women. *Nutr Hosp*. 2015;31(4):1654-9.  
13 42. Stengel S, Kemmler W, Engelke K, Kalender WA. Effects of whole body vibration on bone  
14 mineral density and falls: results of the randomized controlled ELVIS study with postmenopausal women.  
15 *Osteoporos International*. 2011; 22(1):[317-25 pp.].  
16 43. Verschueren SM, Bogaerts A, Delecluse C, Claessens AL, Haentjens P, Vanderschueren D, et  
17 al. The effects of whole-body vibration training and vitamin D supplementation on muscle strength, muscle  
18 mass, and bone density in institutionalized elderly women: a 6-month randomized, controlled trial. *Journal*  
19 *of Bone and Mineral Research* 2011; 26(1):[42-9 pp.].  
20 44. El-Khoury F, Cassou B, Charles MA, Dargent-Molina P. The effect of fall prevention exercise  
21 programmes on fall induced injuries in community dwelling older adults: systematic review and meta-  
22 analysis of randomised controlled trials. *BMJ (Clinical research ed)*. 2013;347:f6234  
23 45. Gillespie LD, Robertson MC, Gillespie WJ, Sherrington C, Gates S, Clemson LM, et al.  
24 Interventions for preventing falls in older people living in the community. *The Cochrane database of*  
25 *systematic reviews*. 2012(9):Cd007146  
26 46. Sherrington C, Michaleff ZA, Fairhall N, Paul SS, Tiedemann AI, Whitney J3, Cumming  
27 RG4, Herbert RD5, Close JC6, Lord SR. Exercise to prevent falls in older adults: an updated systematic  
28 review and meta-analysis. *Br J Sports Med*. 2016 Oct 4. pii: bjsports-2016-096547. doi: 10.1136/bjsports-  
29 2016-096547. [Epub ahead of print]  
30 47. Slatkowska L, Alibhai SM, Beyene J, Hu H, Cheung AM. Effect of 12 months of whole-body  
31 vibration therapy on bone density and structure in postmenopausal women: a randomized trial. *Ann Intern*  
32 *Med*. 2011 Nov 15;155(10):668-79, W205.  
33 48. Bembien DA, Palmer IJ, Knehans AW. Effects of combined whole-body vibration and  
34 resistance training on muscular strength and bone metabolism in postmenopausal women. *Bone*. 2010  
35 Sep;47(3):650-6. doi: 10.1016/j.bone.2010.06.019. Epub 2010 Jun 25.  
36 49. Torvinen S1, Kannus P, Sievänen H, Järvinen TA, Pasanen M, Kontulainen S, Nenonen A,  
37 Järvinen TL, Paakkala T, Järvinen M, Vuori I. Effect of 8-month vertical whole body vibration on bone,  
38 muscle performance, and body balance: a randomized controlled study. *Journal of Bone and Mineral*  
39 *Research* . 2003 May;18(5):876-84.  
40  
41  
42  
43  
44  
45  
46  
47  
48  
49  
50  
51  
52  
53  
54  
55  
56  
57  
58  
59  
60

## Figures

Figure 1. PRISMA Flow Diagram presenting the literature searches and the included studies

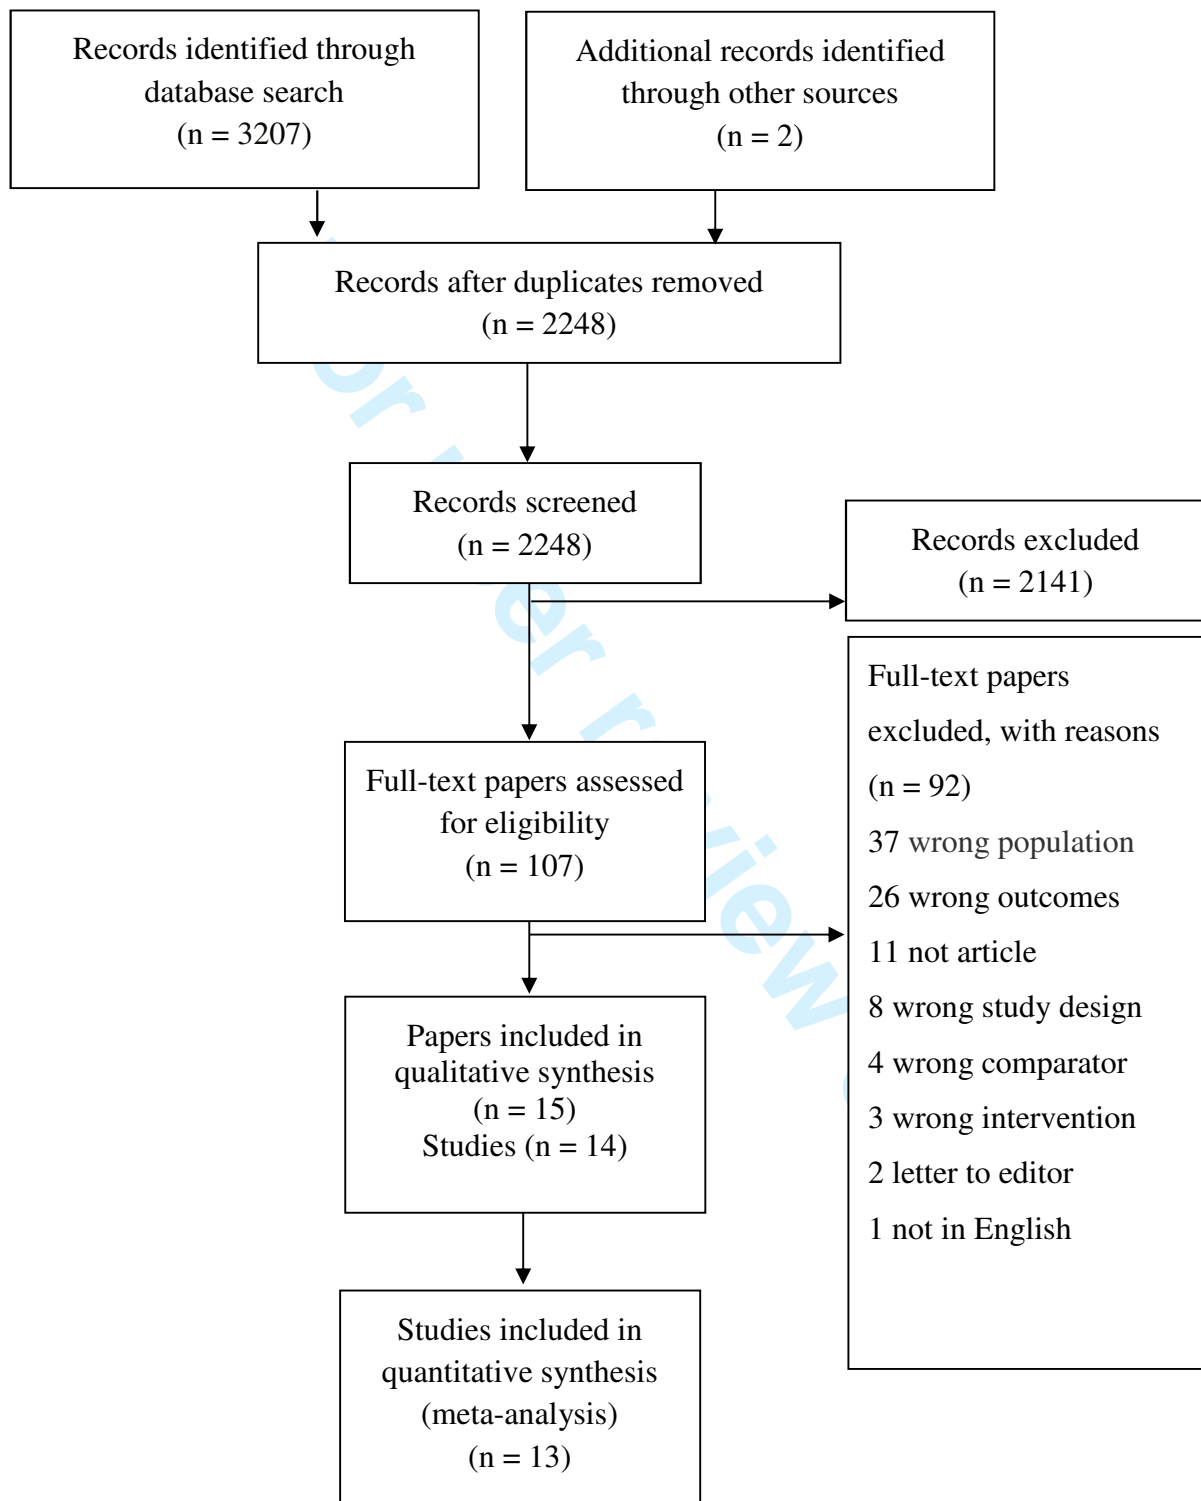

Figure 2.

|                          | Random sequence generation (selection bias) | Allocation concealment (selection bias) | Blinding of participants and personnel (performance bias): Falls | Blinding of participants and personnel (performance bias): Bone quality | Blinding of outcome assessment (detection bias) | Incomplete outcome data (attrition bias) | Selective reporting (reporting bias) |
|--------------------------|---------------------------------------------|-----------------------------------------|------------------------------------------------------------------|-------------------------------------------------------------------------|-------------------------------------------------|------------------------------------------|--------------------------------------|
| Beck 2010                | +                                           | +                                       | -                                                                | ?                                                                       | +                                               | +                                        | ?                                    |
| Buckinx 2014             | +                                           | +                                       | -                                                                |                                                                         | +                                               | +                                        | +                                    |
| Corrie 2015              | +                                           | +                                       |                                                                  | +                                                                       | +                                               | +                                        | +                                    |
| Gomez-Cabello 2014       | ?                                           | ?                                       |                                                                  | ?                                                                       | ?                                               | +                                        | ?                                    |
| Iwamoto 2004             | ?                                           | ?                                       | -                                                                | ?                                                                       | ?                                               | ?                                        | +                                    |
| Kiel 2014                | +                                           | +                                       |                                                                  | +                                                                       | +                                               | +                                        | +                                    |
| Leung 2014               | +                                           | +                                       | -                                                                | ?                                                                       | +                                               | +                                        | +                                    |
| Liphardt 2015            | +                                           | ?                                       |                                                                  | ?                                                                       | ?                                               | +                                        | ?                                    |
| Santin-Medeiros 2015     | +                                           | ?                                       |                                                                  | ?                                                                       | ?                                               | ?                                        | ?                                    |
| Sitjà i Rabert 2015      | +                                           | +                                       | -                                                                |                                                                         | +                                               | +                                        | +                                    |
| Verschueren 2004         | +                                           | ?                                       |                                                                  | ?                                                                       | +                                               | ?                                        | +                                    |
| Verschueren 2011         | +                                           | +                                       |                                                                  | ?                                                                       | +                                               | +                                        | ?                                    |
| Von Stegel 2011          | +                                           | ?                                       | ?                                                                | ?                                                                       | +                                               | +                                        | +                                    |
| Von Stegel Elvis II 2011 | +                                           | ?                                       |                                                                  | ?                                                                       | +                                               | +                                        | ?                                    |

1  
2  
3  
4  
5  
6  
7  
8  
9  
10  
11  
12  
13  
14  
15  
16  
17  
18  
19  
20  
21  
22  
23  
24  
25  
26  
27  
28  
29  
30  
31  
32  
33  
34  
35  
36  
37  
38  
39  
40  
41  
42  
43  
44  
45  
46  
47  
48  
49  
50  
51  
52  
53  
54  
55  
56  
57  
58  
59  
60

Figure 3. Effect of whole-body vibration (WBV) on the relative risk of experiencing a fracture.

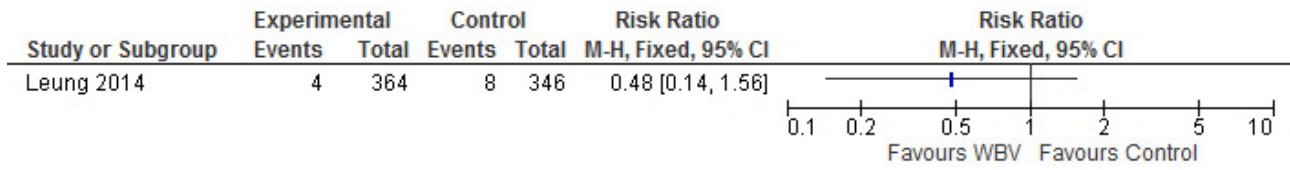

For peer review only

Figure 4. Forest plot of the effect of whole-body vibration (WBV) on falls.

Figure 4-a.

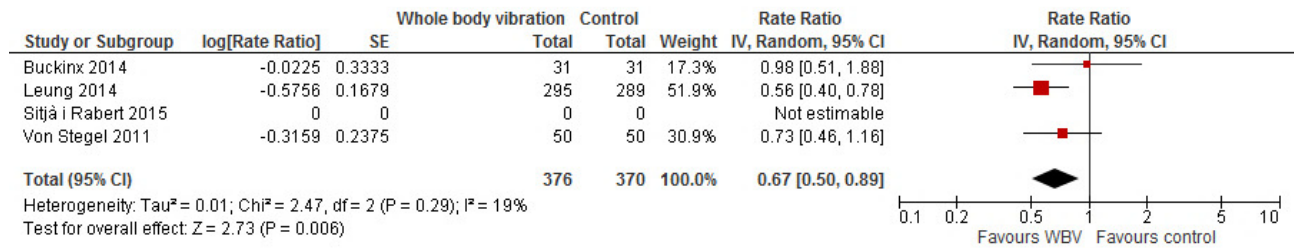

Figure 4-b.

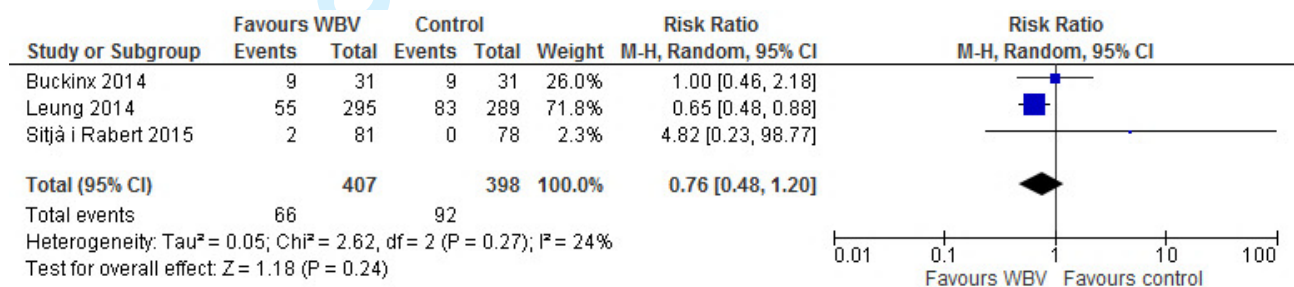

1  
2  
3  
4  
5  
6  
7  
8  
9  
10  
11  
12  
13  
14  
15  
16  
17  
18  
19  
20  
21  
22  
23  
24  
25  
26  
27  
28  
29  
30  
31  
32  
33  
34  
35  
36  
37  
38  
39  
40  
41  
42  
43  
44  
45  
46  
47  
48  
49  
50  
51  
52  
53  
54  
55  
56  
57  
58  
59  
60

Figure 5. The effect of whole-body vibration exercise (WBV) in forest plots on bone mineral density

Figure 5-a.

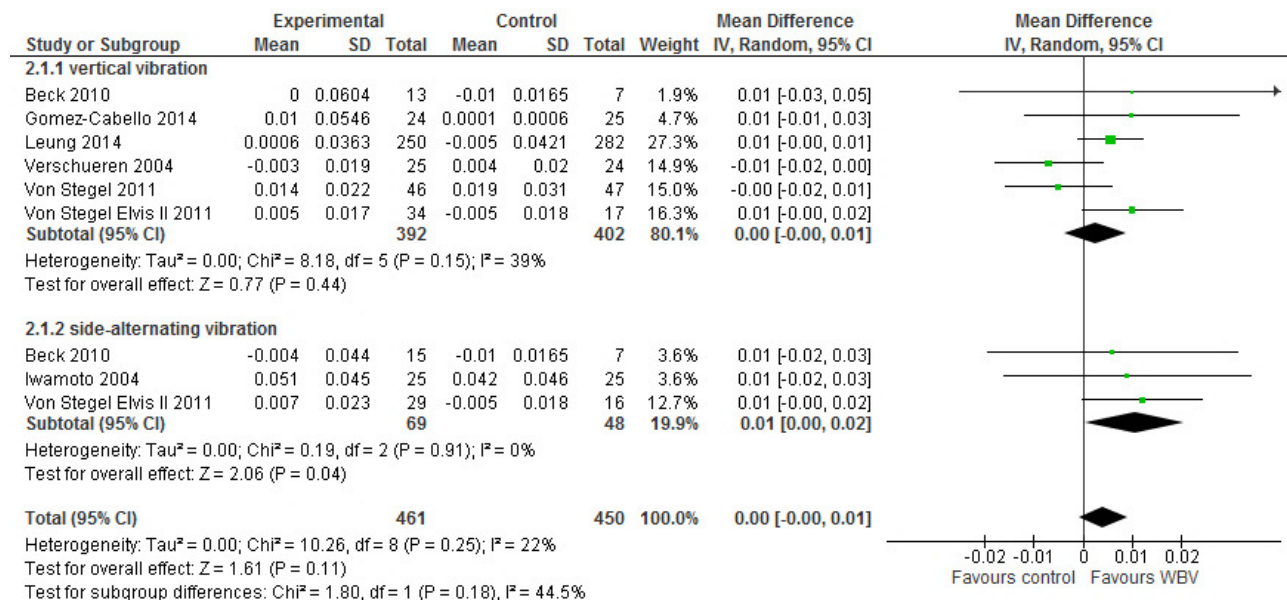

Figure 5-b.

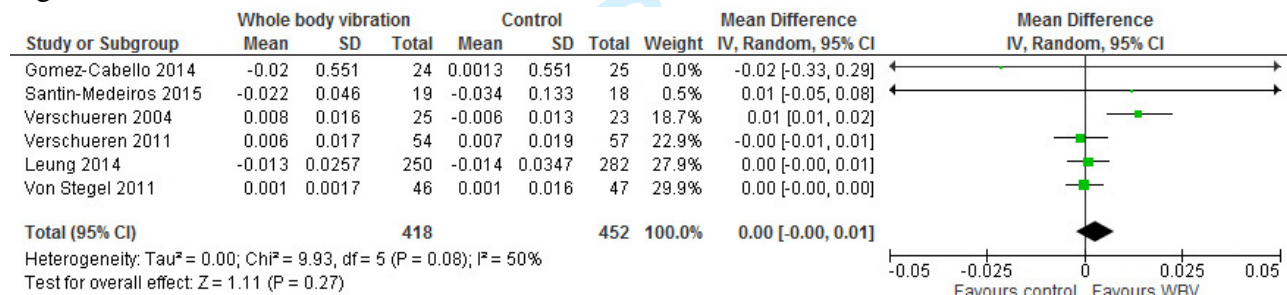

Figure 5-c.

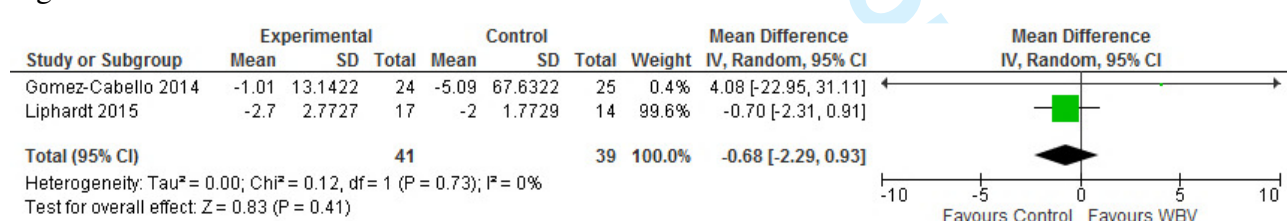

Figure 5-d.

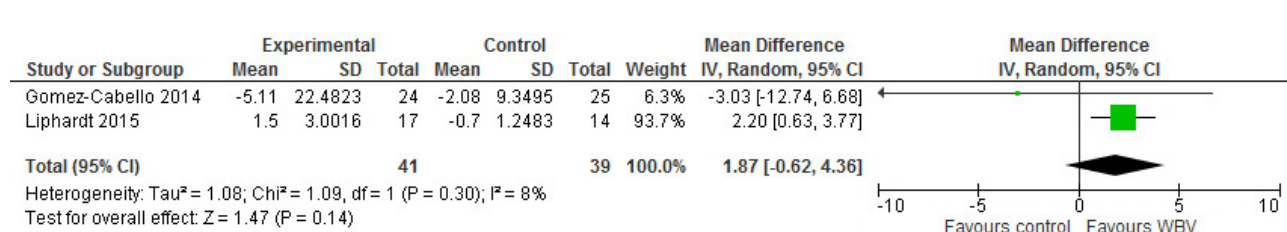

Figure 6. Presents the effect of whole body vibration exercise on bone turnover markers

Figure 6-a.

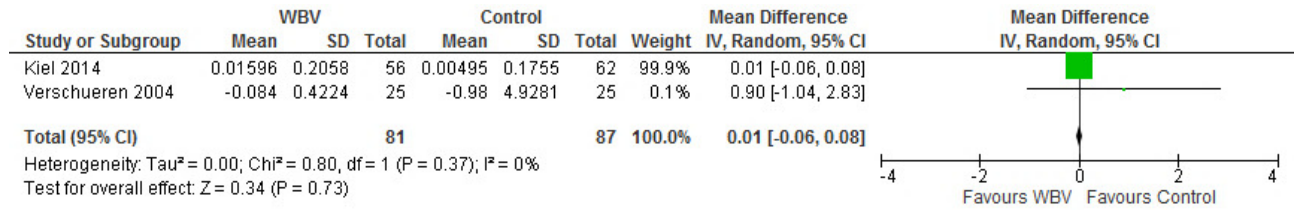

Figure 6-b.

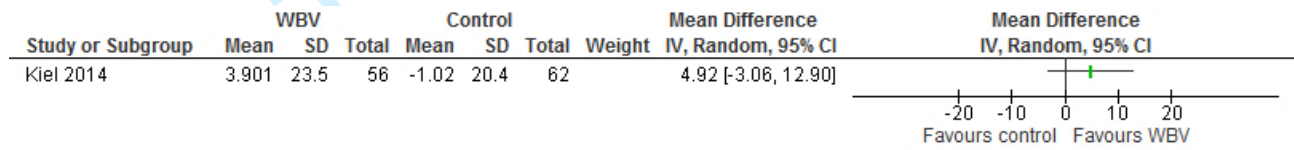

peer review only



1  
2  
3  
4  
5  
6  
7  
8  
9  
10  
11  
12  
13  
14  
15  
16  
17  
18  
19  
20  
21  
22  
23  
24  
25  
26  
27  
28  
29  
30  
31  
32  
33  
34  
35  
36  
37  
38  
39  
40  
41  
42  
43  
44  
45  
46  
47  
48  
49  
50  
51  
52  
53  
54  
55  
56  
57  
58  
59  
60

For peer review only

1 Supplement data Figure 1. presents supplement data on a) fall rate/ person years including adverse effect data on the effect of  
2 who  
3  
4  
5  
6  
7  
8  
9  
10  
11  
12  
13  
14  
15  
16  
17  
18  
19  
20  
21  
22  
23  
24  
25  
26  
27  
28  
29  
30  
31  
32  
33  
34  
35  
36  
37  
38  
39  
40  
41  
42  
43  
44  
45  
46  
47  
48  
49  
50  
51  
52  
53  
54  
55  
56  
57  
58  
59  
60

For peer review only

1  
2  
3  
4  
5  
6  
7  
8  
9  
10  
11  
12  
13  
14  
15  
16  
17  
18  
19  
20  
21  
22  
23  
24  
25  
26  
27  
28  
29  
30  
31  
32  
33  
34  
35  
36  
37  
38  
39  
40  
41  
42  
43  
44  
45  
46  
47  
48  
49  
50  
51  
52  
53  
54  
55  
56  
57  
58  
59  
60

Supplement data Figure 2. presents supplement data of whole-body vibration exercises (WBV) effect on bone architecture parameters with mean difference and 95% CI

For peer review only

Supplement data Figure 3. presents supplement data analysis for microarchitecture parameters of whole-body vibration exercises (WBV) effect on microarchitecture parameters with mean difference and 95% confidence intervals a.) analysis is with total trabecular BMD in tibia (mg HA/cm<sup>3</sup>), b) cortical porosity in % in tibia, c) total trabecular BMD for radius (mg HA/cm<sup>3</sup>) and d) cortical porosity in % for radius.

Supplement data figure 3-a.

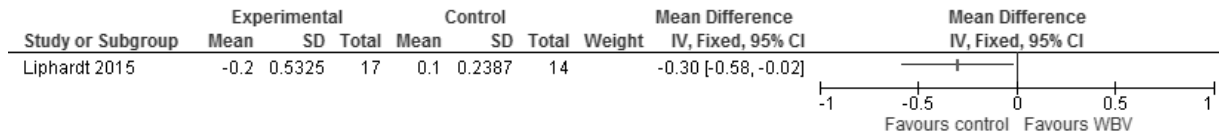

Supplement data figure 3-b.

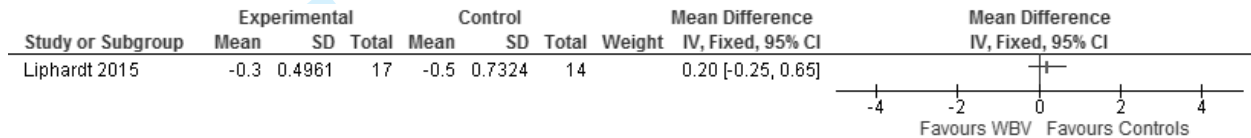

Supplement data figure 3-c.

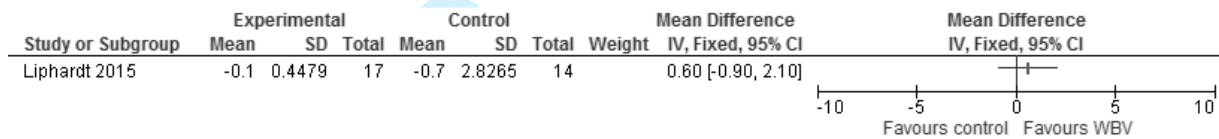

Supplement data figure 3-d.

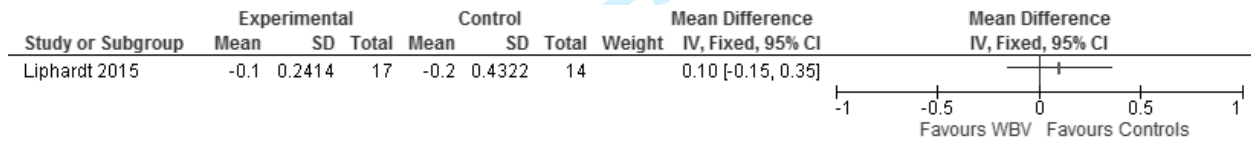

Supplement data Figure 4. presents supplement data of whole-body vibration exercises (WBV) effect on Broadband ultrasound attenuation (BUA) of calcaneus with mean difference and 95% CI. First study line is results from vertical vibration and second line is side alternating vibration, the control group is divided between the two.

Supplement data figure 4.

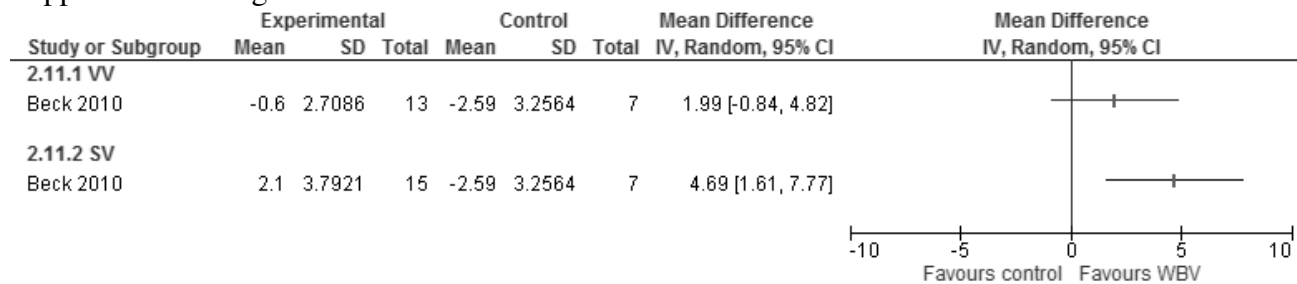

For peer review only

Supplement data Figure 5. presents reported effect on logarithmically transformed data of whole-body vibration exercises (WBV) effect on a) amino terminal propeptide of type I collagen (PINP) (marker of bone formation) with mean difference and 95% CI, and b) carboxy-terminal collagen crosslink (CTX) (marker of bone resorption) with weighted mean difference with 95% CI. First study line is results from side alternating vibration and second line is vertical vibration, the control group is divided between the two.

Supplement data Figure 5-a.

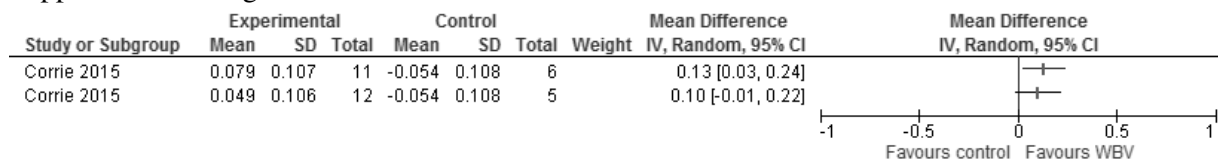

Supplement data Figure 5-b.

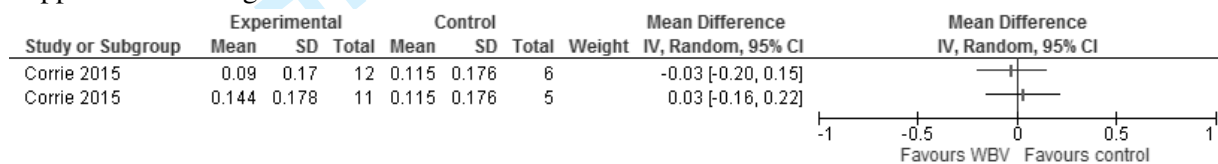

peer review only

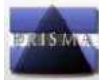

# PRISMA 2009 Checklist

1  
2  
3  
4  
5  
6  
7  
8  
9  
10  
11  
12  
13  
14  
15  
16  
17  
18  
19  
20  
21  
22  
23  
24  
25  
26  
27  
28  
29  
30  
31  
32  
33  
34  
35  
36  
37  
38  
39  
40  
41  
42  
43  
44  
45  
46  
47  
48  
49

| Section/topic                      | #  | Checklist item                                                                                                                                                                                                                                                                                              | Reported on page # |
|------------------------------------|----|-------------------------------------------------------------------------------------------------------------------------------------------------------------------------------------------------------------------------------------------------------------------------------------------------------------|--------------------|
| <b>TITLE</b>                       |    |                                                                                                                                                                                                                                                                                                             |                    |
| Title                              | 1  | Identify the report as a systematic review, meta-analysis, or both.                                                                                                                                                                                                                                         | 1                  |
| <b>ABSTRACT</b>                    |    |                                                                                                                                                                                                                                                                                                             |                    |
| Structured summary                 | 2  | Provide a structured summary including, as applicable: background; objectives; data sources; study eligibility criteria, participants, and interventions; study appraisal and synthesis methods; results; limitations; conclusions and implications of key findings; systematic review registration number. | 2                  |
| <b>INTRODUCTION</b>                |    |                                                                                                                                                                                                                                                                                                             |                    |
| Rationale                          | 3  | Describe the rationale for the review in the context of what is already known.                                                                                                                                                                                                                              | 3-4                |
| Objectives                         | 4  | Provide an explicit statement of questions being addressed with reference to participants, interventions, comparisons, outcomes, and study design (PICOS).                                                                                                                                                  | 4-5                |
| <b>METHODS</b>                     |    |                                                                                                                                                                                                                                                                                                             |                    |
| Protocol and registration          | 5  | Indicate if a review protocol exists, if and where it can be accessed (e.g., Web address), and, if available, provide registration information including registration number.                                                                                                                               | 7                  |
| Eligibility criteria               | 6  | Specify study characteristics (e.g., PICOS, length of follow-up) and report characteristics (e.g., years considered, language, publication status) used as criteria for eligibility, giving rationale.                                                                                                      | 4-6                |
| Information sources                | 7  | Describe all information sources (e.g., databases with dates of coverage, contact with study authors to identify additional studies) in the search and date last searched.                                                                                                                                  | 4                  |
| Search                             | 8  | Present full electronic search strategy for at least one database, including any limits used, such that it could be repeated.                                                                                                                                                                               | appendix           |
| Study selection                    | 9  | State the process for selecting studies (i.e., screening, eligibility, included in systematic review, and, if applicable, included in the meta-analysis).                                                                                                                                                   | 5-6                |
| Data collection process            | 10 | Describe method of data extraction from reports (e.g., piloted forms, independently, in duplicate) and any processes for obtaining and confirming data from investigators.                                                                                                                                  | 5-6                |
| Data items                         | 11 | List and define all variables for which data were sought (e.g., PICOS, funding sources) and any assumptions and simplifications made.                                                                                                                                                                       | 5-7                |
| Risk of bias in individual studies | 12 | Describe methods used for assessing risk of bias of individual studies (including specification of whether this was done at the study or outcome level), and how this information is to be used in any data synthesis.                                                                                      | 5-6                |
| Summary measures                   | 13 | State the principal summary measures (e.g., risk ratio, difference in means).                                                                                                                                                                                                                               | 6-7                |
| Synthesis of results               | 14 | Describe the methods of handling data and combining results of studies, if done, including measures of consistency (e.g., $I^2$ for each meta-analysis).                                                                                                                                                    | 6-7                |

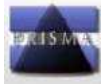

# PRISMA 2009 Checklist

Page 1 of 2

| Section/topic                 | #  | Checklist item                                                                                                                                                                                                                                                       | Reported on page #                     |
|-------------------------------|----|----------------------------------------------------------------------------------------------------------------------------------------------------------------------------------------------------------------------------------------------------------------------|----------------------------------------|
| Risk of bias across studies   | 15 | Specify any assessment of risk of bias that may affect the cumulative evidence (e.g., publication bias, selective reporting within studies).                                                                                                                         | 5-6<br>Table 3                         |
| Additional analyses           | 16 | Describe methods of additional analyses (e.g., sensitivity or subgroup analyses, meta-regression), if done, indicating which were pre-specified.                                                                                                                     | 6-7                                    |
| <b>RESULTS</b>                |    |                                                                                                                                                                                                                                                                      |                                        |
| Study selection               | 17 | Give numbers of studies screened, assessed for eligibility, and included in the review, with reasons for exclusions at each stage, ideally with a flow diagram.                                                                                                      | Figure 1                               |
| Study characteristics         | 18 | For each study, present characteristics for which data were extracted (e.g., study size, PICOS, follow-up period) and provide the citations.                                                                                                                         | Table 1                                |
| Risk of bias within studies   | 19 | Present data on risk of bias of each study and, if available, any outcome level assessment (see item 12).                                                                                                                                                            | Figure 2<br>Table 3                    |
| Results of individual studies | 20 | For all outcomes considered (benefits or harms), present, for each study: (a) simple summary data for each intervention group (b) effect estimates and confidence intervals, ideally with a forest plot.                                                             | Figure 3-6<br>Supplement<br>Figure 1-5 |
| Synthesis of results          | 21 | Present results of each meta-analysis done, including confidence intervals and measures of consistency.                                                                                                                                                              | Figure 3-6                             |
| Risk of bias across studies   | 22 | Present results of any assessment of risk of bias across studies (see Item 15).                                                                                                                                                                                      | Table 3                                |
| Additional analysis           | 23 | Give results of additional analyses, if done (e.g., sensitivity or subgroup analyses, meta-regression [see Item 16]).                                                                                                                                                | Supplement<br>figure 1                 |
| <b>DISCUSSION</b>             |    |                                                                                                                                                                                                                                                                      |                                        |
| Summary of evidence           | 24 | Summarize the main findings including the strength of evidence for each main outcome; consider their relevance to key groups (e.g., healthcare providers, users, and policy makers).                                                                                 | 18-19<br>Table 3                       |
| Limitations                   | 25 | Discuss limitations at study and outcome level (e.g., risk of bias), and at review-level (e.g., incomplete retrieval of identified research, reporting bias).                                                                                                        | 18-20                                  |
| Conclusions                   | 26 | Provide a general interpretation of the results in the context of other evidence, and implications for future research.                                                                                                                                              | 19-20                                  |
| <b>FUNDING</b>                |    |                                                                                                                                                                                                                                                                      |                                        |
| Funding                       | 27 | Describe sources of funding for the systematic review and other support (e.g., supply of data); role of funders for the systematic review only - <a href="http://bmjopen.bmj.com/site/about/guidelines.xhtml">http://bmjopen.bmj.com/site/about/guidelines.xhtml</a> | 20                                     |



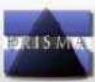

# PRISMA 2009 Checklist

1  
2  
3  
4  
5  
6  
7  
8  
9  
10  
11  
12  
13  
14  
15  
16  
17  
18  
19  
20  
21  
22  
23  
24  
25  
26  
27  
28  
29  
30  
31  
32  
33  
34  
35  
36  
37  
38  
39  
40  
41  
42  
43  
44  
45  
46  
47  
48  
49

From: Moher D, Liberati A, Tetzlaff J, Altman DG, The PRISMA Group (2009). Preferred Reporting Items for Systematic Reviews and Meta-Analyses: The PRISMA Statement. PLoS Med 6(7): e1000097. doi:10.1371/journal.pmed1000097

For more information, visit: [www.prisma-statement.org](http://www.prisma-statement.org).

Page 2 of 2

For peer review only

# BMJ Open

## The Effect Of Whole Body Vibration Exercise In Preventing Falls And Fractures: A Systematic Review And Meta-analysis

|                                 |                                                                                                                                                                                                                                                                                                                                                                                                                                                                                                                                                                                                                                                                                                                                                                                                                                                                                                                                                                                                                                                                             |
|---------------------------------|-----------------------------------------------------------------------------------------------------------------------------------------------------------------------------------------------------------------------------------------------------------------------------------------------------------------------------------------------------------------------------------------------------------------------------------------------------------------------------------------------------------------------------------------------------------------------------------------------------------------------------------------------------------------------------------------------------------------------------------------------------------------------------------------------------------------------------------------------------------------------------------------------------------------------------------------------------------------------------------------------------------------------------------------------------------------------------|
| Journal:                        | <i>BMJ Open</i>                                                                                                                                                                                                                                                                                                                                                                                                                                                                                                                                                                                                                                                                                                                                                                                                                                                                                                                                                                                                                                                             |
| Manuscript ID                   | bmjopen-2017-018342.R1                                                                                                                                                                                                                                                                                                                                                                                                                                                                                                                                                                                                                                                                                                                                                                                                                                                                                                                                                                                                                                                      |
| Article Type:                   | Research                                                                                                                                                                                                                                                                                                                                                                                                                                                                                                                                                                                                                                                                                                                                                                                                                                                                                                                                                                                                                                                                    |
| Date Submitted by the Author:   | 27-Sep-2017                                                                                                                                                                                                                                                                                                                                                                                                                                                                                                                                                                                                                                                                                                                                                                                                                                                                                                                                                                                                                                                                 |
| Complete List of Authors:       | Jepsen, Ditte; Odense Universitetshospital, Department of Geriatric Medicine; Syddansk Universitet Det Sundhedsvidenskabelige Fakultet, Institute of Clinical Research<br>Thomsen , Katja ; Odense Universitetshospital, Department of geriatric medicine; Syddansk Universitet Det Sundhedsvidenskabelige Fakultet, Institute of Clinical Research<br>Hansen, Stinus; Odense Universitetshospital, Department of Endocrinology; Syddansk Universitet Det Sundhedsvidenskabelige Fakultet, Institute of Clinical Research<br>Jørgensen, Niklas; Syddansk Universitet Det Sundhedsvidenskabelige Fakultet, OPEN- Odense Patient data Explorative Network; Rigshospitalet, Department of Clinical Biochemistry<br>Masud, Tahir ; Nottingham University Hospitals NHS Trust, Department of Geriatric Medicine; Syddansk Universitet Det Sundhedsvidenskabelige Fakultet, Institute of Clinical Research<br>Ryg, Jesper; Odense University Hospital, Department of Geriatric Medicine; Syddansk Universitet Det Sundhedsvidenskabelige Fakultet, Institute of Clinical Research |
| <b>Primary Subject Heading</b>: | Geriatric medicine                                                                                                                                                                                                                                                                                                                                                                                                                                                                                                                                                                                                                                                                                                                                                                                                                                                                                                                                                                                                                                                          |
| Secondary Subject Heading:      | Sports and exercise medicine                                                                                                                                                                                                                                                                                                                                                                                                                                                                                                                                                                                                                                                                                                                                                                                                                                                                                                                                                                                                                                                |
| Keywords:                       | Whole-body vibration, WBV, Exercise, Fractures, Accidental falls, Meta-analysis                                                                                                                                                                                                                                                                                                                                                                                                                                                                                                                                                                                                                                                                                                                                                                                                                                                                                                                                                                                             |
|                                 |                                                                                                                                                                                                                                                                                                                                                                                                                                                                                                                                                                                                                                                                                                                                                                                                                                                                                                                                                                                                                                                                             |

SCHOLARONE™  
Manuscripts

# The Effect Of Whole Body Vibration Exercise In Preventing Falls And Fractures: A Systematic Review And Meta-analysis

Ditte Beck Jepsen, MD, PhD student<sup>1,2</sup>, ditte.beck.jepsen2@rsyd.dk

Katja Thomsen, MD, PhD, ass. Professor<sup>2,3</sup>, Katja.Thomsen@rsyd.dk

Stinus Hansen MD, PhD<sup>2,4</sup>, Stinus.Jorn.Hansen@rsyd.dk

Niklas Rye Jørgensen MD, Professor<sup>5,6</sup>, Niklas.Rye.Joergensen@regionh.dk

Tahir Masud MD, Professor<sup>1,2,7</sup>, Tahir.Masud@nuh.nhs.uk

Jesper Ryg, MD, PhD, ass. Professor<sup>1,2</sup>, Jesper.Ryg@rsyd.dk

1: Department of Geriatric Medicine, Odense University Hospital, Denmark

2: Institute of Clinical Research, University of Southern Denmark, Denmark

3: Department of Geriatric Medicine, Odense University Hospital, Svendborg, Denmark

4: Department of Endocrinology, Odense University Hospital, Denmark

5: Department of Clinical Biochemistry, Rigshospitalet, Denmark

6: OPEN- Odense Patient data Explorative Network, Odense University Hospital/ University of Southern Denmark

7: Department of Geriatric Medicine, Nottingham University Hospitals Trust NHS, United Kingdom

Corresponding author

Ditte Beck Jepsen

Word count total: 4662

Word count abstract: 295

Figures: 6

Tables: 3

Appendix: Search string

Supplemental figures: 6

## Abstract

**Objective** - To investigate the effect of Whole Body Vibration exercise (WBV) on fracture risk in adults  $\geq$  50 years of age.

**Design** - A systematic review and meta-analysis calculating relative risk ratios, fall rate ratio, and absolute weighted mean difference using random effects models. Heterogeneity was estimated using  $I^2$  statistics and Cochrane Collaboration's risk of bias tool and the GRADE approach were used to evaluate quality of evidence and summarize conclusions.

**Data sources** - the databases PubMed, EMBASE, and the Cochrane Central Register from inception to April 2016, and reference lists of retrieved publications.

**Eligibility criteria for selecting studies** - randomized controlled trials examining the effect of WBV on fracture risk in adults  $\geq$  50 years of age. The primary outcomes were fractures, fall rates, and the proportion of participants who fell. Secondary outcomes were bone mineral density (BMD), bone microarchitecture, bone turnover markers, and calcaneal broadband attenuation (BUA).

**Results** - 15 papers (14 trials) met the inclusion criteria. Only one study had fracture data reporting a non-significant fracture reduction (RR=0.47, 95% CI 0.14-1.57,  $p=0.22$ ) (Moderate quality of evidence). Four studies ( $n=746$ ) showed that WBV reduced the rate of falls with a rate ratio of 0.67 (95% CI 0.50-0.89,  $p=0.0006$ ;  $I^2=19\%$ ) (moderate quality of evidence). Furthermore, data from three studies ( $n=805$ ) found a trend towards falls reduction (RR=0.76, 95% CI 0.48-1.20,  $p=0.24$ ;  $I^2=24\%$ ) (low quality of evidence). Finally moderate to low quality of evidence showed no overall effect on BMD and only sparse data were available regarding microarchitecture parameters, bone turnover markers, and BUA.

**Conclusions** - WBV reduces fall rate, but seems to have no overall effect on BMD or microarchitecture. The impact of WBV on fractures requires further larger adequately powered studies. This meta-analysis suggests that WBV may prevent fractures by reducing falls.

**Systematic review registration** - PROSPERO ID CRD42016036320.

Key words:

Whole-body vibration, WBV, Exercise, Fractures, Accidental falls, Bone strength, BMD, Meta-analysis

**Strengths and limitations of this study**

- This is the first systematic review comprehensively conducting a meta-analysis on the effect of Whole Body Vibration exercise (WBV) on the overall risk of fractures, including falls
- An extensive systematic literature search identified all available randomised controlled trials using WBV in adults aged 50 on falls, fractures, and bone parameters
- A risk of selection bias exists due to no inclusion of non-English language literature, grey literature, or adverse effects

## Introduction

Fragility fractures are associated with much morbidity, mortality, and cost to society (1, 2). In Europe, the direct medical cost of these fractures has been estimated at 31.7 billion Euros per year, expected to rise to 76.7 billion Euros by 2050 (3). Propensity to fall and osteoporosis are the major determinants of fragility fractures (1, 4, 5).

One third of the population over 65 years of age falls at least once a year (6). Increasing age, frailty, comorbidity, reduced muscle strength, and impaired balance contribute to the risk of falls (4, 6). In Europe 22 million women and 5.5 million men were estimated to have osteoporosis in 2010 (1). WHO criteria for diagnosing osteoporosis is based on measurement of bone mineral density (BMD), but there are also other important aspects of bone fragility including microarchitecture and bone turnover (7, 8). The combination of age-related bone loss and an increased risk of falls, cause a higher incidence of fragility fractures in people aged 50 years or more (1, 9). With an aging population the increased cost caused by fragility fractures poses a significant challenge to healthcare systems (1, 3). Reducing fracture risk with the dual approach of lowering fall risk and enhancing bone strength is therefore desirable (10).

Whole body vibration exercise (WBV) has been proposed as an exercise modality anabolic to bone, capable of enhancing balance, and improving muscle strength (11-14). Animal studies have showed that mechanical signals introduced via vibration stimulate bone formation and suppress bone resorption (15-17). The accelerations from vibration platforms are transmitted to the person standing on the plate from the feet to the adjacent muscles and bones. When the plate moves the adjacent muscles provide contractions as a reflex to the stimulus (18). Whole body vibration has been proposed to counteract aging's suppression on osteoblast activity thereby preventing bone loss (15). WBV with high magnitude (high frequency and/or amplitude) has shown to increase muscular activation and this technique has been suggested as an alternative to weight bearing exercise (18). WBV training protocols varies from a few minutes vibration up to 20 minutes depending on the peak acceleration.

1  
2  
3  
4  
5  
6  
7  
8  
9  
10  
11  
12  
13  
14  
15  
16  
17  
18  
19  
20  
21  
22  
23  
24  
25  
26  
27  
28  
29  
30  
31  
32  
33  
34  
35  
36  
37  
38  
39  
40  
41  
42  
43  
44  
45  
46  
47  
48  
49  
50  
51  
52  
53  
54  
55  
56  
57  
58  
59  
60

The vibration plates can be assessed at home, in the local community or at rehabilitation units with different forms of monitoring and supervision. The WBV is used as an intervention aimed at preventing bone loss, enhancing muscle strength and balance.

Several studies have investigated the role of WBV on BMD, muscle strength, and balance (11, 12, 14, 19-24). However, the results have been inconsistent perhaps due to differences in types of vibration studied; intervention designs, populations assessed, and study quality. Fewer studies have focused on the effect of WBV on falls and bone strength parameters other than BMD (19, 20, 25-27).

Previous systematic reviews on the effect of WBV on balance and muscle strength in older adults have reported improvement in lower extremity muscle strength or in certain balance measures (28-32). Systematic reviews focusing on BMD have shown inconsistent results (32-35), with some showing no overall effect (32), others a small increase in BMD of the hip (33) or no effect on the hip but an effect on lumbar spine (35), whilst some found a BMD increase in certain subgroups only (34). To the best of our knowledge no systematic review has comprehensively investigated the role of WBV on fragility fractures and overall risk of fragility fractures, including falls and bone quality.

The objectives of this systematic review were to address if WBV in adults over 50 years of age could affect the incidence of fractures, falls, as well as estimates of bone mass, architecture and turnover.

## Methods

### Data sources and searches

Literature searches were conducted in the following electronic bibliographic databases: PubMed, EMBASE, and The Cochrane Library (Cochrane Central Register of Controlled Trials (CENTRAL)). The searches were conducted from inception to fourth- of April 2016. Additionally we performed manual searches of the reference lists of retrieved publications and earlier reviews (29, 32-35). An updated search was conducted by end of January 2017, to check for any new relevant studies prior to submission.

The search string was structured with librarian assistance using the PICO method: P (population) = adults  $\geq 50$  years of age, I (intervention) = whole-body sinusoidal vibration (i.e. constant vibration frequency) from a platform, C (comparison) = no intervention, sham, normal care, or same exercise in both arms, and O (outcome) = fractures, falls, and bone property parameters.

The searches were conducted without filters or restrictions and the search string is available as appendix 1.

### Study selection

One author (DJ) screened title and abstracts. Two authors (DJ, KT) independently evaluated the full-text papers and eligibility. Conflicts were resolved by a third author (JR). The selection was conducted using the software Covidence (Covidence systematic review software, Veritas Health Innovation, Melbourne, Australia) and a standardized eligibility form.

1 Inclusion criteria: randomized controlled trials (RCT) investigating the effect of WBV on fractures, falls,  
2 and bone properties within the population  $\geq 50$  years of age. WBV had to be whole-body sinusoidal  
3 vibration (i.e. constant vibration frequency) from a platform that vibrates vertically or side alternating, with  
4 no restriction on frequency, amplitude, or magnitude. The participants had to stand during the WBV. The  
5 control groups had to have either no intervention, usual care, sham vibration, activity unlikely to influence  
6 bone or fall risk parameters, or exercise or interventions identical in both arms (where WBV was an add on  
7 in one group).  
8  
9

10  
11 Trials were ineligible if non RCT, animal studies, population age  $< 50$  years given by the mean age minus  
12 two times the standard deviation, or if the participants were younger than 50 years of age, non-English  
13 language publications, posters, or conference abstracts, and if vibration was applied locally, by electrical  
14 current, non-standing, with random frequencies, using vibrating insoles, or by ultrasound.  
15  
16  
17

#### 18 Data extraction and quality assessment

19  
20 Data was independently extracted by two authors (DJ, KT), using a standardized data extraction form. For  
21 all included studies information was gathered on country of origin, design, randomization, population,  
22 intervention, adherence, analyses per intention to treat (ITT) or per protocol, and results.  
23  
24

25 Primary outcomes of interest were fractures and falls, and secondary outcomes were bone parameters  
26 including BMD (spine and hip), bone microarchitecture (assessed by high resolution peripheral quantitative  
27 computed tomography (HRpQCT) or bone biopsy), bone turnover markers (carboxy-terminal collagen  
28 crosslink (CTX) (bone resorption) or amino terminal propeptide of type I collagen (PINP) (bone  
29 formation)), or calcaneal quantitative ultrasound (BUA).  
30  
31  
32  
33

34 Data was extracted from the intervention and control groups, and if the WBV was an add-on to exercise then  
35 the exercise and WBV arm was compared to the exercise arm.  
36

37 The numbers of fractures and the participants contributing with data were extracted in the groups.

38 Regarding falls, the number of falls, the number of participants who experienced falls, and the number of  
39 participants contributing with data and length of follow-up were extracted. To reduce the clinical  
40 heterogeneity, only falls data from the intervention periods of the studies were extracted.  
41  
42

43 For BMD, bone turnover markers, microarchitecture parameters, and BUA the absolute mean difference  
44 (with standard deviations) from baseline to follow-up were extracted in the intervention and control groups.  
45  
46  
47

48 If the data were reported different than stated above, the corresponding authors of the included studies were  
49 contacted in order to acquire the data.  
50

51 The risk of bias for each included study was assessed using the Cochrane 'Risk of bias tool' (36). The  
52 performance biases were divided in patient reported outcomes (falls) and bone property parameters. The  
53 quality of evidence was assessed for each outcome using the five GRADE considerations and summaries of  
54 findings were created using the GRADE guidelines (37).  
55  
56  
57  
58

#### 59 Strategy for data synthesis and analysis

60 The results across studies were pooled by numbers of events calculating relative risk of fractures and for  
For peer review only - <http://bmjopen.bmj.com/site/about/guidelines.xhtml>

1 experiencing one or more falls (fallers) with 95% CI. Fall incident rate ratio per patient year with 95% CI  
2 were calculated using the reported rate of falls (falls per person year) or the rate of falls in each group were  
3 calculated from the total number of falls and the total length of the intervention duration (person years) for  
4 participants contributing with data in each group using STATA (Stata Statistical Software: Release 14, TX:  
5 StataCorp LP). The mean differences in BMD, bone turnover markers, microarchitecture parameters, and  
6 BUA were pooled calculating the absolute mean difference and 95% CI. The mean differences were  
7 calculated subtracting the baseline means from the follow-up or by multiplying percent change with baseline  
8 means. The standard deviations (SD) were calculated using the formula  $((HCI-LCI)/2/TINV(0.05;n-1)*\sqrt{n})$ ,  
9 where HCI is the highest value of 95% CI, LCI the lowest value of 95% CI, and n the sample size of  
10 the group,  $TINV(0.05;n-1)$  = t value for a 95% confidence interval from a sample size of n, (36), by using p-  
11 values for change over time in Review Manager calculator (RevMan) (version 5.3, Copenhagen: The Nordic  
12 Cochrane Centre, The Cochrane Collaboration 2014), or by the formula  $SD = ((m_i - m_c) / TINV(p\text{-value};$   
13  $df)) / \sqrt{(1/n_i + 1/n_c)}$ , where  $m_i$  is the mean difference in the intervention group,  $m_c$  is the mean difference in  
14 the control group, df is degrees of freedom,  $n_i$  is the sample size in the intervention group, and  $n_c$  is the  
15 sample size in the control group (36). When cluster randomization was used adjustments were applied (36).  
16 The number of participants contributing with data in each group was used for the calculations if this was  
17 reported, otherwise the number of participants randomized to each group was extracted. Where possible the  
18 longest follow-up times were used (with two papers reporting three and six month data, six month data were  
19 used) (26, 27). In case of post hoc study extension, the originally planned duration was used (22).  
20 Calculations were performed using Excel (Microsoft Excel (2010)), and STATA14. To allow for variability  
21 among the participants and interventions, the random effect meta-analysis model in RevMan was used.  
22 Heterogeneity was assessed by forest plots and the I-squared statistics. Pre-assigned subgroup analyses for  
23 sinusoidal vertical and side-alternating WBV were done where possible.  
24

25 The review protocol was registered 1<sup>st</sup> of April 2016 in PROSPERO (ID:CRD42016036320) and reported  
26 according to the PRISMA 2009 statement, and the checklist was completed (38).  
27

## 28 Results

### 29 Study selection and characteristics

30 A total of 3,207 titles and abstracts were initially identified, and after removal of 959 duplicates, 2,248 titles  
31 and abstracts were screened for relevance. The majority of identified papers were excluded because they  
32 described animal studies, were not RCTs, or did not meet the definition of the intervention. A total of 107  
33 full text papers were read and matched to the inclusion and exclusion criteria. Selection of the included  
34 studies is illustrated in the PRISMA flow diagram (Figure 1). The updated search revealed no new relevant  
35 studies.  
36

### 37 Study characteristics

38 A total of 15 papers (14 studies) met the criteria for the qualitative synthesis and are described in Table 1.  
39 The studies were published from 2004 to 2015, with an accumulated population of 1,839 (ranging from 42  
40 For peer review only - <http://bmjopen.bmj.com/site/about/guidelines.xhtml>



1 (20) to 710 (21) participants in the included studies). The mean age of the overall population was 74 years,  
2 with 82% living independently and 90% being women. All studies were RCT with one trial using cluster-  
3 randomisation (21). The Six studies compared WBV to continued daily activities (20, 21, 26, 39-41), with  
4 one study using two different forms of WBV (39). Three studies compared WBV to exercise or wellness  
5 therapy (24, 25, 42), and one study compared WBV to exercise and to continued daily activities (12). Two  
6 studies compared WBV to sham (19, 22). One study compared WBV and high or low dose vitamin D  
7 supplementation to no training and high or low dose vitamin D supplementation (43). One study compared  
8 WBV and alendronate to no training and alendronate (23). Eight trials reported supervised training (19, 20,  
9 25, 26, 39-41, 43), two electronically monitored (21, 22), two using attendance logs (24, 42), and two did  
10 not state any form of measurement of adherence (12, 23).  
11  
12  
13  
14  
15  
16  
17  
18  
19  
20  
21  
22  
23  
24  
25  
26  
27  
28  
29  
30  
31  
32  
33  
34  
35  
36  
37  
38  
39  
40  
41  
42  
43  
44  
45  
46  
47  
48  
49  
50  
51  
52  
53  
54  
55  
56  
57  
58  
59  
60

Table 1. Description of the included studies

| Author and year (ref)                | Design                                                   | Setting                                              | Participants No.   | Women % | Age (mean, SD, range)        | Analysed   | Outcomes of interest                                           | Supervision           |
|--------------------------------------|----------------------------------------------------------|------------------------------------------------------|--------------------|---------|------------------------------|------------|----------------------------------------------------------------|-----------------------|
| Beck 2010 (39)                       | 3-arm RCT<br>LWBV vs. HWBV vs. continue daily activities | Australian independently living postmenopausal women | 47<br>(15, 17, 15) | 100     | 71.5±9.5                     | ITT/PP     | aBMD hip and spine, BUA of calcaneus, falls as adverse effects | yes                   |
| Beudart 2011 / Buckinx 2013 (27, 26) | 2-arm RCT<br>WBV vs. continue daily activities           | Belgium nursing home residents                       | 62<br>(31, 31)     | 76      | 83.2±7.9                     | ITT        | falls                                                          | yes                   |
| Corrie 2014 (19)                     | 3-arm RCT<br>vWBV vs. svWBV vs. sham                     | England referred to Geriatric falls clinic           | 61<br>(21, 20, 20) | 61      | 80.2±6.5                     | ITT        | turnover markers (CTX, P1NP)                                   | yes                   |
| Gomez-Cabello 2013 (40)              | 2-arm RCT<br>WBV vs. continue daily activities           | Spain non-institutionalised elderly                  | 49<br>(24, 25)     | 59      | WBV 75.2±4.7<br>CON 74.8±4.9 | ITT        | aBMD hip and spine, pQCT                                       | yes                   |
| Iwamoto 2004 (23)                    | 2-arm RCT<br>WBV + alendronate vs. alendronate           | Japan osteoporotic women                             | 50<br>(25, 25)     | 100     | 55-88                        | not stated | aBMD spine, falls as adverse effects                           | not stated            |
| Kiel 2015 (22)                       | 2-arm RCT<br>WBV vs. sham                                | North America independently living elderly           | 174<br>(89, 85)    | 67      | 82±7                         | ITT        | vBMD hip and spine, turnover markers (CTX, P1NP)               | electronic monitoring |
| Leung 2014 (21)                      | 2-arm cluster RCT<br>WBV vs. continue daily activities   | China ≥ 60 yr independently living women             | 710<br>(364, 346)  | 100     | 74.5±7.1<br>71.3±7.2         | ITT        | fractures, falls, aBMD hip and spine                           | electronic monitoring |
| Liphardt 2015 (20)                   | 2-arm RCT<br>WBV vs. continue daily activities           | Canada osteopenic women                              | 42<br>(22, 20)     | 100     | 58.5±3.3<br>59.1±4.6         | not stated | HRpQCT, aBMD                                                   | yes                   |
| Santin-Medeiros 2014 (41)            | 2-arm RCT<br>WBV vs. continue daily activities           | Spain women >79 yr                                   | 43<br>(25, 18)     | 100     | 82.4±5.7                     | ITT/PP     | aBMD hip                                                       | yes 8                 |

|    |                                     |                                                                                           |                                                          |                     |     |          |            |                                                  |                    |
|----|-------------------------------------|-------------------------------------------------------------------------------------------|----------------------------------------------------------|---------------------|-----|----------|------------|--------------------------------------------------|--------------------|
| 5  | Sitjà-Rabert 2015<br>(25)           | 2-arm RCT<br>WBV + exercise vs. exercise                                                  | Spain<br>nursing home residents >65<br>yr                | 159<br>(81, 79)     | 67  | 82       | ITT        | falls                                            | yes                |
| 8  | Von Stegel 2011<br>(42)             | 3-arm RCT<br>WBV + exercise vs. exercise vs.<br>wellness therapy                          | Germany<br>women ≥65 yr, living<br>independently         | 151<br>(50, 50, 51) | 100 | 68.5±3.1 | ITT        | falls, aBMD hip and<br>spine                     | attendance<br>list |
| 14 | Von Stegel<br>2011 Elvis II<br>(24) | 3-arm RCT<br>vWBV vs. svWBV vs. wellness<br>therapy                                       | Germany<br>women ≥65 yr, living<br>independently         | 108<br>(36, 36, 36) | 100 | 68.5±3.1 | ITT        | aBMD femoral neck<br>and spine                   | attendance<br>logs |
| 18 | Verschuereen 2004<br>(12)           | 3-arm RCT<br>WBV vs. exercise vs. no training                                             | Belgium<br>postmenopausal women non<br>institutionalized | 70<br>(25, 22, 23)  | 100 | 58-74    | not stated | aBMD hip and spine,<br>turnover markers<br>(CTX) | not stated         |
| 21 | Verschuereen 2011<br>(43)           | 4-arm RCT<br>WBV + HDvit vs. WBV + Dvit vs. no<br>training + HDvit vs. no training + Dvit | Belgium<br>women living in nursing<br>homes              | 113                 | 100 | 79.6     | ITT        | aBMD hip                                         | yes                |

Abbreviations: aBMD = areal bone mineral density, CON = controls, CTX = carboxy-terminal collagen crosslink, Dvit = conventional dose vitamin D, HDvit = high dose vitamin D, HR-pQCT = high resolution peripheral quantitative computed tomography, HWBV = high magnitude whole body vibration, ITT = intent to treat, LWBV = low magnitude whole body vibration, P1NP = amino terminal propeptide of type I collagen, PP = per protocol, pQCT = peripheral quantitative computed tomography, SD = standard deviation, svWBV = side-alternating whole-body vibration, vBMD = volumetric bone mineral density, vWBV = vertical whole-body vibration, WBV = whole body vibration exercise, and yr = years of age

The studies varied in the intervention protocols with differences in vibration design, duration, and follow-up (Table 2). Eleven studies used high magnitude WBV ( $\geq 1$  g in peak acceleration) (HWBV) (12, 19, 20, 23-26, 40-43) with two of these studies comparing vertical with side-alternating vibration and wellness therapy/sham vibration (19, 24). Two studies used low magnitude WBV ( $< 1$  g in peak acceleration) (LWBV) (21-22), and one study compared low magnitude WBV to high magnitude side alternating WBV (39). In the studies using high magnitude WBV five used side-alternating vibration (19, 20, 23, 24, 39) and nine studies used vertical vibration (12, 19, 24, 25, 39-43). Frequencies ranged from 12.5 - 40 Hertz, peak to peak displacement ranged from 0.7-4.2 mm, and peak acceleration from 0.3 - 8 g. The exercises were most often vibration spouts lasting from 15 seconds to 20 minutes, from every day to once a week, and the duration of the intervention were from 6 weeks to 24 months. In two studies the participants used flat soled shoes/gymnastic shoes (12, 24), two studies described the intervention shoeless (19, 26), while the other ten studies did not report a protocol for footwear (Table 2).

Table 2. Intervention parameters in the included studies

| Author and year (ref)               | Intervention (frequency, peak to peak displacement/ amplitude, peak acceleration) | Vibration type/ device | Protocol exercise                                      | Training time (total vibration per session, training frequency) | Duration | Footwear   |
|-------------------------------------|-----------------------------------------------------------------------------------|------------------------|--------------------------------------------------------|-----------------------------------------------------------------|----------|------------|
| Beck 2010 (39)                      | LWBV 30 Hz, not stated, 0.3 g                                                     | vWBV/ Juvent 1000DMT   | standing full upright no bending                       | 15 min, 2 days/week                                             | 8 months | not stated |
|                                     | HWBV 12.5 Hz, 0-14 mm amplitude, 1 g                                              | svWBV/ Galileo 2000    | knees slightly bent                                    | 6 min, 2 days/week                                              |          |            |
| Beudart 2013/ Buckinx 2014 (26, 27) | 30 Hz 2 mm amplitude, not stated                                                  | vWBV/ Vibrosphere      | standing on two feet knees flexed                      | 75 s, 3 days/week                                               | 6 months | shoeless   |
| Corrie 2014 (19)                    | vWBV 28.4 Hz, 1.3 mm peak-to-peak, 1.5 g                                          | vWBV/ Power plate      | standing with bent knees                               | 6 min, 3 days/week                                              | 12 weeks | shoeless   |
|                                     | svWBV 29.8 Hz, 2.9 mm peak-to-peak, 3.6 g                                         | sv/ Galileo 2000       |                                                        |                                                                 |          |            |
| Gomez-Cabello 2013 (40)             | 40 Hz, 2 mm amplitude, not stated                                                 | vWBV/ Pro5Power plate  | standing with knees slightly bent holding the handrail | 7.5 min, 3 days/week                                            | 11 weeks | not stated |

1  
2  
3  
4  
5  
6  
7  
8  
9  
10  
11  
12  
13  
14  
15  
16  
17  
18  
19  
20  
21  
22  
23  
24  
25  
26  
27  
28  
29  
30  
31  
32  
33  
34  
35  
36  
37  
38  
39  
40  
41  
42  
43  
44  
45  
46  
47  
48  
49  
50  
51  
52  
53  
54  
55  
56  
57  
58  
59  
60

|                                    |                                                       |                                |                                                                                                                                                             |                           |              |                     |
|------------------------------------|-------------------------------------------------------|--------------------------------|-------------------------------------------------------------------------------------------------------------------------------------------------------------|---------------------------|--------------|---------------------|
| Iwamoto 2004<br>(23)               | 20 Hz, 0.7-4.2 mm<br>peak to peak, not<br>stated      | svWBV/<br>Galileo              | standing with bent knees                                                                                                                                    | 4 min,<br>1 days/week     | 12<br>months | not stated          |
| Kiel 2015 (22)                     | 37 Hz, 0.09 mm<br>amplitude, 0.3 g                    | vWBV/<br>not stated            | upright relaxed stand                                                                                                                                       | 10 min,<br>7 days/week    | 24<br>months | not stated          |
| Leung 2014<br>(21)                 | 35 Hz, peak-to-<br>peak < 0.1 mm, 0.3<br>g            | vWBV/<br>not stated            | upright no without<br>bending knees                                                                                                                         | 20 min,<br>5 days/week    | 18<br>months | not stated          |
| Liphardt 2015<br>(20)              | 20 Hz, 3-4 mm<br>amplitude, not<br>stated             | svWBV/<br>Vibraflex<br>Galileo | stable position 30<br>degree knee flexion<br>angel                                                                                                          | 10 min,<br>2-3 days/week  | 12<br>months | not stated          |
| Santin-<br>Medeiros<br>2015 (41)   | 20 Hz, 2 mm<br>amplitude, not<br>stated               | vWBV/<br>Fitvibe Excel<br>Pro  | 18 different exercises,<br>squats                                                                                                                           | 6-6.5 min,<br>2 days/week | 8 months     | not stated          |
| Sitjà-Rabert<br>2015 (25)          | 30-35 Hz, 2-4 mm<br>amplitude, not<br>stated          | vWBV/<br>Powerplate            | 30 min static/dynamic<br>exercises                                                                                                                          | 3-6 min,<br>3 days/week   | 6 weeks      | not stated          |
| Von Stegel<br>2011 Elvis<br>(42)   | 25-35 Hz, 1.7 mm<br>amplitude, not<br>stated          | vWBV/<br>Vibrafit              | 45 min dancing, balance<br>and gymnastics and 15<br>min dynamic leg-<br>strengthening with<br>WBV and two at home<br>sessions (20 min) with<br>no vibration | 6 min,<br>2 days/week     | 18<br>months | not stated          |
| Von Stegel<br>2011 ElvisII<br>(24) | vvWBV, 35 Hz,<br>1.7 mm peak to<br>peak, 8 g          | vWBV/<br>Vibrafit              | standing position, seven<br>one or two-legged<br>dynamic leg<br>strengthening exercises                                                                     | 10 min,<br>3 days/week    | 18<br>months | flat-soled<br>shoes |
|                                    | svWBV 12.5 Hz,<br>12 mm peak-to-<br>peak, 8 g         | svWBV/<br>Qionic               |                                                                                                                                                             |                           |              |                     |
| Verschueren<br>2004 (12)           | 35-40 Hz, 1.7-2.5<br>mm<br>amplitude, 2.28-<br>5.09 g | vWBV/<br>Power plate           | static and dynamic<br>exercises on the<br>vibration platform                                                                                                | 20 min,<br>3 days/week    | 6 months     | gymnastic<br>shoes  |
| Verschueren<br>2011 (43)           | 30-40 Hz, not<br>stated, 1.6-2.2 g.                   | vWBV/<br>Power plate           | static and dynamic<br>exercises on the<br>vibration platform                                                                                                | 12 min,<br>3 days/week    | 6 months     | not stated          |

Abbreviations: g = 9.81 m/s<sup>2</sup>, HWBV = high magnitude vibration, Hz = Hertz, LWBV = low magnitude vibration, min = minutes, mm = millimetre, s = seconds, svWBV = side alternating whole body vibration, and vWBV = vertical whole body vibration.

## Outcomes

One study reported fractures as the primary outcome. A total of six studies reported fall data. Three authors were contacted to obtain data on fall rate (23, 25) and fall risk (42) and this way data were obtained from one trial (25).

Data on bone parameters were reported in percent change, or pre- and post-intervention measurements in eight studies. The corresponding authors were contacted (12, 19-23, 39, 41, 43), and data were obtained this way from three studies (19, 21, 22).

In two studies data were extracted from previous reviews (33, 34), which reported to have primary data available from the authors (12, 23, 41), and in the rest of the studies the outcomes were calculated as described in the method section.

## Risk of biases within studies

The majority of studies were categorized as having a low risk of bias in the randomization with unclear risk of bias in the allocation due to insufficient reporting in half of the studies. The performance bias was categorized as high risk when the participants reported falls and were not blinded to the intervention. One study used wellness therapy in the control group and did not inform the participants of the hypotheses, and was thus considered unclear in the risk of performance bias with respect to falls reporting (42). Non-blinding of participants were categorized as unclear risk of bias when the outcome were bone parameters. The risk of bias in selective reporting was categorized as low risk if the trial reported all stated outcomes in the papers and was conducted before 2005. After 2005 trials had to be registered online at a registry or having published a study protocol reporting the pre-specified outcomes. Figure 2 shows a summary of the risk of bias assessment.

## Fractures

One study reported fractures as a primary outcome (Risk Ratio (RR) 0.48 (95% CI 0.14-1.56), with an intra-cluster correlation coefficient of 0.000 (Figure 3).

## Falls

Four studies reported falls as primary outcome (21, 25, 26, 42). Three studies reported fallers and the number of falls in total in each group during the intervention (21, 25, 26) and one study reported the mean number of falls per participants (42). One study reported no events in the control arm in the six weeks intervention and adjusted rate ratio could not be calculated. Pooling the studies with falls reported as outcomes showed a fall rate ratio of 0.67 (95% CI 0.50-0.89,  $p=0.006$ ,  $I^2=19\%$ ) (Figure 4-a) in the intervention groups compared to non-intervention and a relative risk of experiencing falls of 0.76 (95% CI 0.48-1.20,  $p=0.24$ ,  $I^2=24\%$ ) (Figure 4-b).

Two trials reported falls as adverse effects (23, 39). A post hoc sensitivity analysis was conducted to assess if the inclusion of these trials would alter the result. In this analysis a fall rate/person years rate ratio of 0.65 (95% CI 0.50-0.85,  $p=0.002$ ,  $I^2=8\%$ ) was found and a relative risk of experiencing falls of 0.67 (95% CI 0.46-0.98,  $p=0.04$ ,  $I^2=13\%$ ) (Supplement data Fig 1 a-b).

Post hoc subgroup analyses were conducted to assess the association between the duration and the magnitude of the vibration and falls, duration over six months fall rate ratio of 0.61 (95% CI 0.47-0.80,  $p=0.0004$ ,  $I^2=0\%$ , 2 studies), duration over six months and relative risk of experiencing falls of 0.61 (95% CI 0.47-0.80,  $p=0.0004$ ,  $I^2=0\%$ , 2 studies), low magnitude vibration fall rate ratio of 0.56 (95% CI 0.40-0.78,  $p=0.0006$ , 1 study), high magnitude vibration fall rate ratio of 0.80 (95% CI 0.55-1.18,  $p=0.26$ ,  $I^2=0\%$ , 2 studies) (supplement data Fig 2 a-c).

### Bone Mineral Density

Seven studies reported data on lumbar spine BMD (12, 21, 23, 24, 39, 40, 42). The results showed no overall effect with a mean difference of 0.00 (95% CI -0.00-0.01,  $p=0.11$ ,  $I^2=22\%$ ) (Figure 5-a). Six studies reported data on total hip BMD (12, 21, 40-43) showing similar results with a mean difference of 0.00 (95% CI -0.00-0.01,  $p=0.27$ ,  $I^2=50\%$ ) (Figure 5-b). Subgroup analyses with vertical and side-alternation vibration explained 44.5% of the heterogeneity in the lumbar spine BMD, and side-alternation vibration showed a mean difference of 0.01 (95% CI 0.00-0.02,  $p=0.04$ ,  $I^2=0\%$ ) with 117 participants. All studies reporting BMD in total hip used vertical vibration.

One study reported change in total proximal femoral trabecular BMD and change in integral lumbar spine vertebral BMD (22). The results from the originally planned duration of 24 months showed no effect on integral lumbar spine vertebral BMD with a mean difference of 0.00 (95% CI -0.00-0.00) and total femoral trabecular BMD mean difference of 0.00 (95% CI -0.00-0.01) (Supplement data Fig 3 a-b). Two studies reported volumetric BMD (vBMD) of radius and tibia using HR-pQCT (20) or quantitative computed tomography (pQCT) scans (37). The results for the ultradistal site using HR-pQCT and a 4% site in tibia and radius using pQCT were combined in forestplots showing no statistically significant effects with a vBMD tibia mean difference of -0.68 (95% CI -2.29-0.93,  $p=0.41$ ,  $I^2=0$ ) and a vBMD radius mean difference of 1.87 (95% CI -0.62-4.36,  $p=0.30$ ,  $I^2=8$ ) (Figure 5 c-d).

### Bone microarchitecture

One study reported measurements of cortical porosity (Ct.Po) and trabecular BMD (tbBMD) (20) using HR-pQCT. We refrained from performing a meta-analysis due to the limited data (Supplement data Fig 4). In tibia, WBV compared to control showed an increase in mean difference in Ct.Po of 0.20 % (95% CI -0.25-0.65) and decrease in tbBMD mean difference -0.3 mg HA/cm<sup>3</sup> (95% CI -0.58-0.02). In radius, WBV

1 compared to no intervention showed an increase mean difference in Ct.Po of 0.10 % (95% CI -0.15-0.35)  
2 and decrease in tbBMD mean difference -0.90 mg HA/cm<sup>3</sup> (95% CI -0.90-2.10) (Supplement data Fig 4).  
3  
4  
5  
6

#### 7 Bone turnover markers

8 One study reported data on the bone resorption marker CTX (12) and two studies on both CTX and the bone  
9 formation marker P1NP (19, 22). One of the studies reported log transformed CTX and P1NP (19) and no  
10 untransformed data could be obtained from the authors. The result for the meta-analysis on CTX was a mean  
11 difference of 0.01 ng/mL (95% CI -0.06-0.08, p=0.73, I<sup>2</sup>=0) and with data available from only one trial the  
12 result for P1NP was a mean difference of 4.92 ng/mL (95% CI -3.06-12.90) (Figure 6 a-b).  
13  
14  
15  
16  
17  
18  
19

#### 20 Calcaneal BUA

21 A single study reported calcaneal BUA mean change in comparing two vibration groups with a control  
22 group (39), we refrained from performing a meta-analysis due to the limited data ( Supplement data Fig 5).  
23 The low magnitude vertical vibration group had a mean difference of 1.99 dB/MHz (95% CI-0.84- 4.82) and  
24 the high magnitude side-altering vibration group a mean change of 4.69 dB/MHz (95% CI 1.61-7.77)  
25 compared to the controls (Supplement data Fig 5).  
26  
27  
28  
29

#### 30 Quality assesment

31 Quality of evidence was assessed for each outcome (Table 3). For the outcome of fractures the evidence was  
32 downgraded for imprecision due to the 95% confidence interval around the pooled estimate of effect  
33 includes both the possibility of no effect and appreciable benefit. The evidence for falls rate was  
34 downgraded for study limitations due to non-blinding of the participants. The risk of falls was downgraded  
35 for imprecision and study limitations due to non-blinding of the participants. Bone parameters were all  
36 downgraded for indirectness since they are surrogate markers for bone strength. Regarding bone parameters  
37 the outcomes were downgraded for imprecision if the 95% confidence interval around the pooled estimate of  
38 effect includes both the possibility of no effect and appreciable benefit and for inconsistency if the I<sup>2</sup>  
39 statistics showed substantial heterogeneity. Publication bias could not be assessed by a funnel plot with  
40 Egger's test since all of the meta-analyses contained less than 10 studies (36).  
41  
42  
43  
44  
45  
46  
47  
48  
49  
50

51 **Table 3.** Summary of findings table presents the findings and the quality of each outcome using the GRADE  
52 considerations  
53

---

#### 54 **WBV compared to usual care for fracture risk**

---

#### 55 **Bibliography:**

---



| Outcomes                                            | № of participants (studies) Follow-up | Quality of the evidence (GRADE) | Relative effect (95% CI)              | Anticipated absolute effects |                                                         |
|-----------------------------------------------------|---------------------------------------|---------------------------------|---------------------------------------|------------------------------|---------------------------------------------------------|
|                                                     |                                       |                                 |                                       | Risk with usual care         | Risk difference with WBV                                |
| fractures                                           | 710<br>(1 RCT)                        | ⊕⊕⊕○<br>MODERATE <sup>a</sup>   | <b>RR 0.48</b><br>(0.14-1.56)         | 2 per 100                    | <b>1 fewer per 100</b><br>(2 fewer to 1 more)           |
| fall rate/person years                              | 746<br>(3 RCTs)                       | ⊕⊕⊕○<br>MODERATE <sup>b</sup>   | <b>Rate ratio 0.67</b><br>(0.50-0.89) | 34 per 100                   | <b>11 fewer per 100</b><br>(17 fewer to 4 fewer)        |
| The risk of experiencing falls (fallers)            | 805<br>(3 RCTs)                       | ⊕⊕○○<br>LOW <sup>c</sup>        | <b>RR 0.76</b><br>(0.48-1.20)         | 23 per 100                   | <b>6 fewer per 100</b><br>(12 fewer to 5 more)          |
| Total bone mineral density lumbar spine (BMD spine) | 911<br>(7 RCTs)                       | ⊕⊕⊕○<br>MODERATE <sup>d</sup>   | -                                     |                              | mean <b>0</b><br>(0 to 0.01 higher)                     |
| Bone mineral density total hip (BMD hip)            | 870<br>(6 RCTs)                       | ⊕⊕○○<br>LOW <sup>e</sup>        | -                                     |                              | mean <b>0</b><br>(0 to 0.01 higher)                     |
| Volumetric bone mineral density tibia               | 80<br>(2 RCTs)                        | ⊕⊕○○<br>LOW <sup>f</sup>        | -                                     |                              | mean <b>0.68 lower</b><br>(2.29 lower to 0.93 higher)   |
| Volumetric bone mineral density radius              | 80<br>(2 RCTs)                        | ⊕○○○<br>VERY LOW <sup>g</sup>   | -                                     |                              | mean <b>1.87 higher</b><br>(0.62 lower to 4.36 higher)  |
| Serum biomarker of bone resorption (CTX)            | 138<br>(2 RCTs)                       | ⊕⊕○○<br>LOW <sup>f</sup>        | -                                     |                              | mean <b>0.01 higher</b><br>(-0.06 lower to 0.08 higher) |

## WBV compared to usual care for fracture risk

### Bibliography:

| Outcomes                                 | № of participants (studies) Follow-up | Quality of the evidence (GRADE) | Relative effect (95% CI) | Anticipated absolute effects |                                                        |
|------------------------------------------|---------------------------------------|---------------------------------|--------------------------|------------------------------|--------------------------------------------------------|
|                                          |                                       |                                 |                          | Risk with usual care         | Risk difference with WBV                               |
| Serum biomarker of bone formation (P1NP) | 118 (1 RCT)                           | ⊕⊕○○<br>LOW <sup>f</sup>        | -                        |                              | mean <b>4.92 higher</b><br>(3.06 lower to 12.9 higher) |

\*The risk in the intervention group (and its 95% confidence interval) is based on the assumed risk in the comparison group and the relative effect of the intervention (and its 95% CI).

CI: Confidence interval; RR: Risk ratio

### GRADE Working Group grades of evidence

**High quality:** We are very confident that the true effect lies close to that of the estimate of the effect

**Moderate quality:** We are moderately confident in the effect estimate: The true effect is likely to be close to the estimate of the effect, but there is a possibility that it is substantially different

**Low quality:** Our confidence in the effect estimate is limited: The true effect may be substantially different from the estimate of the effect

**Very low quality:** We have very little confidence in the effect estimate: The true effect is likely to be substantially different from the estimate of effect

a. serious imprecision, due to the 95% confidence interval around the estimate of effect includes both the possibility of no effect and appreciable benefit.

b. serious study limitations- lack of blinding of the participants reporting falls.

c. serious study limitations- lack of blinding of the participants reporting fall, and serious imprecision, due to the 95% confidence interval around the pooled estimate of effect includes both the possibility of no effect and appreciable benefit.

d. indirectness (surrogate marker for bone strength).

e. indirectness, and statistical heterogeneity

f. indirectness, and imprecision due to the 95% confidence interval around the estimate of effect includes both the possibility of no effect and appreciable benefit.

g. indirectness, and imprecision due to the 95% confidence interval around the estimate of effect includes both the possibility of no effect and appreciable benefit and statistical heterogeneity.

### Discussion

This systematic review and meta-analysis provides evidence that whole-body vibration exercise reduces fall rate in adults above 50 years of age. We found a tendency in reduction of the proportion of fallers, no overall

1 effect on BMD whereas only sparse data were available regarding bone microarchitecture parameters, bone  
2 turnover markers, and BUA. One study reported fractures showing non-significant fracture reduction.  
3  
4

#### 5 Strengths and limitations

6 This study had some limitations. By not including non-English language literature and not extracting data  
7 from grey literature or adverse effects the risk of selection bias exists. Looking at the studies reporting falls  
8 as adverse effects in the included studies, the WBV reduces the falls rate and risk in agreement with our  
9 findings.  
10  
11  
12  
13

14  
15  
16 Only one study had fractures as primary outcome and had a low fracture rate (21). The studies contributing  
17 with falls data were unblinded which could be important when reporting falls. However, all studies included  
18 in the primary falls analysis did record falls prospectively limiting the risk of recall bias (21, 25, 26, 42). The  
19 populations in the studies consisted of 82% community dwelling adults with 90% being female, making the  
20 results generalizable only to people with similar characteristics.  
21  
22  
23  
24

25  
26 Strengths of this review include that the evidence is obtained from randomized controlled trials, followed the  
27 PRISMA guidelines of reporting, and was registered at PROSPERO to improve transparency. A thorough  
28 literature search was conducted with assistance from a research librarian and we furthermore performed a  
29 hand search of the reference lists of included papers and earlier reviews references (28, 29, 32-35). The  
30 risk of selection bias was reduced by having two independent reviewers select the papers and extract the  
31 data. In the systematic review all outcomes were assessed regarding quality using the GRADE guidelines  
32 where fracture is classified as a critical outcome (37). We classified falls as an important outcome, and  
33 bone parameters being of limited importance as surrogate makers for fracture risk (37). We only pooled  
34 homogeneous outcomes in the meta-analysis leading to low statistical heterogeneity in the falls analysis with  
35 moderate statistical heterogeneity regarding BMD of the hip and spine. Pre-assigned subgroup analysis for  
36 vertical vs. side-alternating vibration could explain 44.5% of the heterogeneity in the lumbar spine analysis,  
37 whereas regarding total hip BMD all studies used vertical vibration and no subgroup analysis was  
38 performed. Meta-regression analysis was not performed due to the insufficient number of studies in the  
39 analysis (36).  
40  
41  
42  
43  
44  
45  
46  
47  
48

#### 49 Comparisons with other studies and reviews

50 Prior reviews of exercise have shown that exercise programs designed to prevent falls in older adults also  
51 seem to prevent injuries caused by falls, including fractures (44, 45). The majority of these exercise  
52 programs included balance training, functional training, and strengthening exercises. Earlier reviews have  
53 shown that WBV have balance improving capabilities and the ability to improve muscle strength of the  
54  
55  
56  
57  
58  
59  
60

1 lower extremities (27-31), and WBV might thus prevent fractures by its fall reducing capacity or by  
2 lowering the impact of a fall.  
3

4 Our meta-analysis shows that rate of falls can be reduced, and suggests a reduction in the proportion of  
5 fallers. The number needed to treat to prevent one fall was 11 (Table 3). Sustaining a fall increases the risk  
6 of injury, and reducing the number of times an individual falls, even if not the number of fallers may have  
7 clinical and economic relevance to the individual and to society. Falls are very prevalent among the aging  
8 population with one in every three 65+ year olds experiencing a fall every year (6). Due to an ageing  
9 population a focus on interventions capable of reducing falls seems of utmost importance (10). Prior  
10 systematic reviews have shown that other exercise programmes can reduce fall rate through muscle strength  
11 and balance training, and it has been found that exercising for a period of more than three hours per week is  
12 associated with a larger decrease in fall rate (46). WBV exercise consists of shorter workouts and with the  
13 ability to stand as the only requirement for physical function. With the available data the analysis shows a  
14 fall reduction in the vibration groups with low heterogeneity and with the observational power of the post  
15 hoc subgroup analyses we found an association between studies with duration longer than 6 months and a  
16 larger reduction in falls.  
17  
18  
19  
20  
21  
22  
23  
24  
25

26 To our knowledge this is the first meta-analysis conducted on WBV and falls but earlier findings of a  
27 positive effect on surrogate markers for falls (balance and muscle strength) (27-31) can be viewed as an  
28 improvement in important risk factors for falls in agreement with our findings.  
29  
30

31 Our results on BMD are consistent with other systematic reviews, showing no overall effect on BMD (31-  
32 34). Earlier reviews suggested a positive effect on BMD in adolescents (32) and in a subgroup analysis with  
33 improvements after low-magnitude WBV on lumbar spine BMD (33) and high magnitude WBV on total hip  
34 BMD (32). We found a similar but small effect of side alternating vibration on lumbar spine BMD. In  
35 contrast to others, this systematic review also comprehensively assessed other bone parameters i.e. bone  
36 microarchitecture, turnover markers, and BUA. We found one study assessing cortical porosity and  
37 trabecular BMD of tibia and radius (20) with no overall effect, which is in line with results found in a  
38 younger age group (47). We found no effect on bone resorption markers in line with studies in younger  
39 participants (48, 49). One study in this review had a positive effect in bone formation markers, but with  
40 logarithmic transformed data it could not be pooled with non-transformed data (19) (Supplement data Fig 6).  
41 One study looked at BUA of the calcaneus showing a positive effect (39) in conflict with earlier findings  
42 from younger participants (47). Animal data suggest an effect of WBV on bone strength (15-18), but the  
43 same effect in humans is not evident. Reasons for this include diversities in training protocols, duration,  
44 adherence, damping of the vibration by the use of shoes, and different standing positions on the vibration  
45 plates.  
46  
47  
48  
49  
50  
51  
52  
53  
54  
55

56 In summary, the the evidence from this systematic review indicate that WBV may reduce fall rate with  
57 moderate certainty, and the risk of falls with low certainty. Future trials could enhance the certainty by  
58  
59  
60

1 systematically reporting falls when monitoring adverse effects, and if possible by blinding participants. The  
2 quality of evidence for the effect on bone parameters is moderate to low, partly since they are surrogate  
3 markers of fracture risk and future research should focus on the critical outcome fractures with larger trial  
4 sizes and adequate follow-up.  
5  
6  
7

## 8 9 **Conclusion**

10 In conclusion, our data shows a reduced rate of falls by WBV. Only one study reported fractures showing a  
11 non-significant reduction. We found no effect on BMD, and the data on microarchitecture and bone turnover  
12 markers were sparse. WBV exercise could be implemented in current falls prevention guidelines. It might  
13 potentially reduce fractures by reducing falls but the impact on fractures needs further larger adequately  
14 powered studies.  
15  
16  
17  
18  
19  
20

## 21 22 **Funding**

23 This study was supported by funding from the Odense University Hospital, The Region of Southern  
24 Denmark Ph.D. foundation, the Faculty of Health Sciences, University of Southern Denmark.  
25  
26  
27  
28

## 29 30 **Conflict of interest**

31 All authors have completed the ICMJE uniform disclosure form at and declare no conflict of interests. DJ  
32 has received research grants from the Odense University Hospital, The Region of Southern Denmark Ph.D.  
33 foundation, the Faculty of Health Sciences, University of Southern Denmark, and the Danish Osteoporosis  
34 Foundation. The funding parties have no influence on the study design, study conduct, results, or  
35 dissemination.  
36  
37  
38  
39  
40

## 41 42 **Author contributions**

43 All authors helped in the conception and design of the work and interpretation of data. Three authors  
44 reviewed the papers (DJ, KT, and JR) and two authors extracted the data (DJ, KT). DJ, TM, and JR did the  
45 first draft and all authors revised it critically for important intellectual content. All authors approved the final  
46 version for publication. DJ is guarantor.  
47  
48  
49  
50

## 51 52 **Data sharing statement**

53 No additional data are available.  
54  
55

## 56 57 **Acknowledgments**

58  
59  
60

1 We would like to thank associate professor Carsten Bøgh Juhl for extensive help and support in performing  
2 the statistical analyses and research librarian PhD Mette Brandt Eriksen for the help with the literature  
3 searches. We would also like to acknowledge Professor Dr. Douglas P. Kiel, PhD Mercè Sitjà-Rabert, and  
4 Dr. Katherine Brooke-Wavell for sending us the data from their studies and the grant from the National  
5 Institute on Aging (R01 AG025489) which generated the data from the VIBES trial .  
6  
7  
8  
9  
10  
11  
12  
13  
14  
15  
16  
17  
18  
19  
20  
21  
22  
23  
24  
25  
26  
27  
28  
29  
30  
31  
32  
33  
34  
35  
36  
37  
38  
39  
40  
41  
42  
43  
44  
45  
46  
47  
48  
49  
50  
51  
52  
53  
54  
55  
56  
57  
58  
59  
60

## References

1. Hernlund E, Svedbom A, Ivergard M, Compston J, Cooper C, Stenmark J, et al. Osteoporosis in the European Union: medical management, epidemiology and economic burden. A report prepared in collaboration with the International Osteoporosis Foundation (IOF) and the European Federation of Pharmaceutical Industry Associations (EFPIA). *Archives of osteoporosis*. 2013;8:136.
2. Johnell O, Kanis JA. An estimate of the worldwide prevalence and disability associated with osteoporotic fractures. *Osteoporos International* . 2006;17(12):1726-33.
3. Kanis JA, Johnell O. Requirements for DXA for the management of osteoporosis in Europe. *Osteoporos International* . 2005;16(3):229-38.
4. Tinetti ME, Doucette J, Claus E, Marottoli R. Risk factors for serious injury during falls by older persons in the community. *Journal of the American Geriatrics Society*. 1995;43(11):1214-21.
5. Cummings SR, Nevitt MC. Non-skeletal determinants of fractures: the potential importance of the mechanics of falls. Study of Osteoporotic Fractures Research Group. *Osteoporos International* . 1994;4 Suppl 1:67-70.
6. Blake AJ, Morgan K, Bendall MJ et al. Falls by elderly people at home: prevalence and associated factors. *Age Aging*1988; Nov 17(6): 365-72. -5.
7. Boutroy S, Khosla S, Sornay-Rendu E, Zanchetta MB, McMahon DJ, Zhang CA, et al. Microarchitecture and Peripheral BMD are Impaired in Postmenopausal White Women With Fracture Independently of Total Hip T-Score: An International Multicenter Study. *Journal of Bone and Mineral Research*. 2016;31(6):1158-66.
8. Vasikaran S, Eastell R, Bruyere O, Foldes AJ, Garnero P, Griesmacher A, et al. Markers of bone turnover for the prediction of fracture risk and monitoring of osteoporosis treatment: a need for international reference standards. *Osteoporos International* . 2011;22(2):391-420.
9. Curtis EM, van der Velde R, Moon RJ, van den Bergh JP, Geusens P, de Vries F, et al. Epidemiology of fractures in the United Kingdom 1988-2012: Variation with age, sex, geography, ethnicity and socioeconomic status. *Bone*. 2016;87:19-26.
10. Blain H, Masud T, Dargent-Molina P, Martin FC, Rosendahl E, van der Velde N, et al. A Comprehensive Fracture Prevention Strategy in Older Adults: The European Union Geriatric Medicine Society (EUGMS) Statement. *The journal of nutrition, health & aging*. 2016;20(6):647-52.
11. Bogaerts A, Delecluse C, Claessens AL, Coudyzer W, Boonen S, Verschueren SM. Impact of whole-body vibration training versus fitness training on muscle strength and muscle mass in older men: a 1-year randomized controlled trial. *The journals of gerontology Series A, Biological sciences and medical sciences*. 2007;62(6):630-5.
12. Verschueren SMP, Roelants M, Delecluse C, Swinnen S, Vanderschueren D, Boonen S. Effect of 6-month whole body vibration training on hip density, muscle strength, and postural control in postmenopausal women: A randomized controlled pilot study. *Journal of Bone and Mineral Research*. 2004;19(3):352-9.
13. Gusi N, Raimundo A, Leal A. Low-frequency vibratory exercise reduces the risk of bone fracture more than walking: a randomized controlled trial. *BMC musculoskeletal disorders*. 2006;7:92.
14. Cheung WH, Mok HW, Qin L, Sze PC, Lee KM, Leung KS. High-frequency whole-body vibration improves balancing ability in elderly women. *Arch Phys Med Rehabil*. 2007;88(7):852-7.
15. Rubin C, Turner AS, Bain S, Mallinckrodt C, McLeod K. Anabolism. Low mechanical signals strengthen long bones. *Nature*. 2001;412(6847):603-4.
16. Rubin C, Turner AS, Mallinckrodt C, Jerome C, McLeod K, Bain S. Mechanical strain, induced noninvasively in the high-frequency domain, is anabolic to cancellous bone, but not cortical bone. *Bone*. 2002;30(3):445-52.
17. Pichler K, Loreto C, Leonardi R, Reuber T, Weinberg AM, Musumeci G. RANKL is downregulated in bone cells by physical activity (treadmill and vibration stimulation training) in rat with glucocorticoid-induced osteoporosis. *Histology and histopathology*. 2013;28(9):1185-96.
18. Pollock RD, Woledge RC, Mills KR, Martin FC, Newham DJ. Muscle activity and acceleration during whole body vibration: effect of frequency and amplitude. *Clinical biomechanics (Bristol, Avon)*. 2010;25(8):840-6.

19. Corrie H, Brooke-Wavell K, Mansfield NJ, Cowley A, Morris R, Masud T. Effects of vertical and side-alternating vibration training on fall risk factors and bone turnover in older people at risk of falls. *Age Ageing*. 2015;44(1):115-22.
20. Liphardt AM, Schipilow J, Hanley DA, Boyd SK. Bone quality in osteopenic postmenopausal women is not improved after 12 months of whole-body vibration training. *Osteoporosis International*. 2015; 26(3):[911-20 pp.]
21. Leung KS, Li CY, Tse YK, Choy TK, Leung PC, Hung VWY, et al. Effects of 18-month low-magnitude high-frequency vibration on fall rate and fracture risks in 710 community elderly - A cluster-randomized controlled trial. *Osteoporosis International*. 2014;25(6):1785-95.
22. Kiel DP, Hannan MT, Barton BA, Bouxsein ML, Sisson E, Lang T, et al. Low-Magnitude Mechanical Stimulation to Improve Bone Density in Persons of Advanced Age: A Randomized, Placebo-Controlled Trial. *Journal of Bone and Mineral Research* 2015; 30(7):[1319-28 pp.]
23. Iwamoto J, Takeda T, Sato Y, Uzawa M. Effect of whole-body vibration exercise on lumbar bone mineral density, bone turnover, and chronic back pain in post-menopausal osteoporotic women treated with alendronate. *Aging Clin Exp Res*. 2004; 17(2):[157-63 pp.]
24. Stengel S, Kemmler W, Bebenek M, Engelke K, Kalender WA. Effects of whole-body vibration training on different devices on bone mineral density. *Medicine & Science in Sports & Exercise*. 2011; 43(6):[1071-9 pp.]
25. Sitjà-Rabert M, Martínez-Zapata MJ, Fort Vanmeerhaeghe A, Rey Abella F, Romero-Rodríguez D, Bonfill X. Effects of a whole body vibration (WBV) exercise intervention for institutionalized older people: a randomized, multicentre, parallel, clinical trial. *Journal of the American Medical Directors Association*. 2015; 16(2):[125-31 pp.]
26. Buckinx F, Beaudart C, Maquet D, Demonceau M, Crielaard JM, Reginster JY, et al. Evaluation of the impact of 6-month training by whole body vibration on the risk of falls among nursing home residents, observed over a 12-month period: a single blind, randomized controlled trial *Aging Clin Exp Res*. 2014; 26(4):[369-76 pp.]
27. Beaudart C, Maquet D, Mannarino M, Buckinx F, Demonceau M, Crielaard JM, et al. Effects of 3 months of short sessions of controlled whole body vibrations on the risk of falls among nursing home residents. *BMC geriatrics*. 2013;13:42
28. Lam FM, Lau RW, Chung RC, Pang MY. The effect of whole body vibration on balance, mobility and falls in older adults: a systematic review and meta-analysis. *Maturitas*. 2012;72(3):206-13.
29. Sitja-Rabert M, Rigau D, Fort Vanmeerghaeghe A, Romero-Rodríguez D, Bonastre Subirana M, Bonfill X. Efficacy of whole body vibration exercise in older people: a systematic review. *Disability and rehabilitation*. 2012;34(11):883-93.
30. Orr R. The effect of whole body vibration exposure on balance and functional mobility in older adults: a systematic review and meta-analysis. *Maturitas*. 2015;80(4):342-58.
31. Rogan S, de Bruin ED, Radlinger L, Joehr C, Wyss C, Stuck NJ, et al. Effects of whole-body vibration on proxies of muscle strength in old adults: a systematic review and meta-analysis on the role of physical capacity level. *European review of aging and physical activity : official journal of the European Group for Research into Elderly and Physical Activity*. 2015;12:12.
32. Lau RW, Liao LR, Yu F, Teo T, Chung RC, Pang MY. The effects of whole body vibration therapy on bone mineral density and leg muscle strength in older adults: a systematic review and meta-analysis. *Clinical rehabilitation*. 2011;25(11):975-88.
33. Slatkowska L, Alibhai SM, Beyene J, Cheung AM. Effect of whole-body vibration on BMD: a systematic review and meta-analysis. *Osteoporosis International* . 2010;21(12):1969-80.
34. Oliveira LC, Oliveira RG, Pires-Oliveira DA. Effects of whole body vibration on bone mineral density in postmenopausal women: a systematic review and meta-analysis. *Osteoporosis International* . 2016;27(10):2913-33.
35. Ma C, Liu A, Sun M, Zhu H, Wu H. Effect of whole-body vibration on reduction of bone loss and fall prevention in postmenopausal women: a meta-analysis and systematic review. *Journal of orthopaedic surgery and research*. 2016;11:24.
36. Higgins JPT GSe. *Cochrane Handbook for Systematic Reviews of Interventions* Version 5.1.0 [updated March 2011].



- 1 37 Schünemann H BJ, Guyatt G, Oxman A GRADE handbook for grading quality of evidence  
2 and strength of recommendations Updated October 2013. The GRADE Working Group,  
3 38. Moher D, Liberati A, Tetzlaff J, Altman DG. Preferred reporting items for systematic reviews  
4 and meta-analyses: the PRISMA statement. *Journal of clinical epidemiology*. 2009;62(10):1006-12.  
5 39. Beck BR, Norling TL. The effect of 8 mos of twice-weekly low- or higher intensity whole  
6 body vibration on risk factors for postmenopausal hip fracture. *American journal of physical medicine &*  
7 *rehabilitation*. 2010; 89(12):[997-1009 pp.].  
8 40. Gomez-Cabello A, Gonzalez-Aguero A, Morales S, Ara I, Casajus JA, Vicente-Rodriguez G.  
9 Effects of a short-term whole body vibration intervention on bone mass and structure in elderly people. *J Sci*  
10 *Med Sport*. 2014;17(2):160-4.  
11 41. Santin-Medeiros F, Santos-Lozano A, Rey-Lopez JP, Vallejo NG. Effects of eight months of  
12 whole body vibration training on hip bone mass in older women. *Nutr Hosp*. 2015;31(4):1654-9.  
13 42. Stengel S, Kemmler W, Engelke K, Kalender WA. Effects of whole body vibration on bone  
14 mineral density and falls: results of the randomized controlled ELVIS study with postmenopausal women.  
15 *Osteoporos International*. 2011; 22(1):[317-25 pp.].  
16 43. Verschueren SM, Bogaerts A, Delecluse C, Claessens AL, Haentjens P, Vanderschueren D, et  
17 al. The effects of whole-body vibration training and vitamin D supplementation on muscle strength, muscle  
18 mass, and bone density in institutionalized elderly women: a 6-month randomized, controlled trial. *Journal*  
19 *of Bone and Mineral Research* 2011; 26(1):[42-9 pp.].  
20 44. El-Khoury F, Cassou B, Charles MA, Dargent-Molina P. The effect of fall prevention exercise  
21 programmes on fall induced injuries in community dwelling older adults: systematic review and meta-  
22 analysis of randomised controlled trials. *BMJ (Clinical research ed)*. 2013;347:f6234  
23 45. Gillespie LD, Robertson MC, Gillespie WJ, Sherrington C, Gates S, Clemson LM, et al.  
24 Interventions for preventing falls in older people living in the community. *The Cochrane database of*  
25 *systematic reviews*. 2012(9):Cd007146  
26 46. Sherrington C, Michaleff ZA, Fairhall N, Paul SS, Tiedemann A1, Whitney J3, Cumming  
27 RG4, Herbert RD5, Close JC6, Lord SR. Exercise to prevent falls in older adults: an updated systematic  
28 review and meta-analysis. *Br J Sports Med*. 2016 Oct 4. pii: bjsports-2016-096547. doi: 10.1136/bjsports-  
29 2016-096547. [Epub ahead of print]  
30 47. Slatkowska L, Alibhai SM, Beyene J, Hu H, Cheung AM. Effect of 12 months of whole-body  
31 vibration therapy on bone density and structure in postmenopausal women: a randomized trial. *Ann Intern*  
32 *Med*. 2011 Nov 15;155(10):668-79, W205.  
33 48. Bembien DA, Palmer IJ. Effects of combined whole-body vibration and resistance training on  
34 muscular strength and bone metabolism in postmenopausal women. *Bone*. 2010 Sep;47(3):650-6. doi:  
35 10.1016/j.bone.2010.06.019. Epub 2010 Jun 25.  
36 49. Torvinen S1, Kannus P, Sievänen H, Järvinen TA, Pasanen M, Kontulainen S, Nenonen A,  
37 Järvinen TL, Paakkala T, Järvinen M, Vuori I. Effect of 8-month vertical whole body vibration on bone,  
38 muscle performance, and body balance: a randomized controlled study. *Journal of Bone and Mineral*  
39 *Research* . 2003 May;18(5):876-84.  
40  
41  
42  
43  
44  
45  
46  
47  
48  
49  
50  
51  
52  
53  
54  
55  
56  
57  
58  
59  
60

Figure 1. PRISMA Flow Diagram presenting the literature searches and the included studies

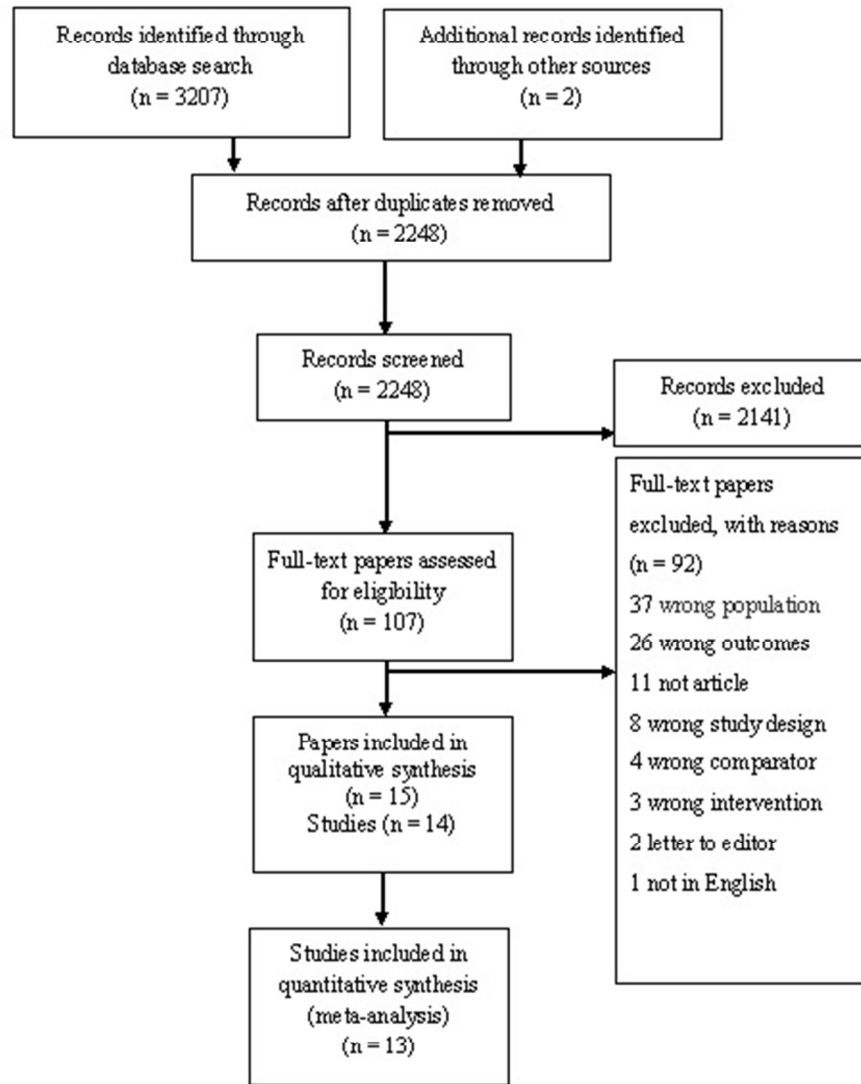

Figure 1. PRISMA Flow Diagram presenting the literature searches and the included studies.

110x132mm (300 x 300 DPI)

1  
2  
3  
4  
5  
6  
7  
8  
9  
10  
11  
12  
13  
14  
15  
16  
17  
18  
19  
20  
21  
22  
23  
24  
25  
26  
27  
28  
29  
30  
31  
32  
33  
34  
35  
36  
37  
38  
39  
40  
41  
42  
43  
44  
45  
46  
47  
48  
49  
50  
51  
52  
53  
54  
55  
56  
57  
58  
59  
60

|                          | Random sequence generation (selection bias) | Allocation concealment (selection bias) | Blinding of participants and personnel (performance bias): Falls | Blinding of participants and personnel (performance bias): Bone quality | Blinding of outcome assessment (detection bias) | Incomplete outcome data (attrition bias) | Selective reporting (reporting bias) |
|--------------------------|---------------------------------------------|-----------------------------------------|------------------------------------------------------------------|-------------------------------------------------------------------------|-------------------------------------------------|------------------------------------------|--------------------------------------|
| Beck 2010                | +                                           | +                                       | -                                                                | ?                                                                       | +                                               | +                                        | ?                                    |
| Buckinx 2014             | +                                           | +                                       | -                                                                |                                                                         | +                                               | +                                        | +                                    |
| Corrie 2015              | +                                           | +                                       |                                                                  | +                                                                       | +                                               | +                                        | +                                    |
| Gomez-Cabello 2014       | ?                                           | ?                                       |                                                                  | ?                                                                       | ?                                               | +                                        | ?                                    |
| Iwamoto 2004             | ?                                           | ?                                       | -                                                                | ?                                                                       | ?                                               | ?                                        | +                                    |
| Kiel 2014                | +                                           | +                                       |                                                                  | +                                                                       | +                                               | +                                        | +                                    |
| Leung 2014               | +                                           | +                                       | -                                                                | ?                                                                       | +                                               | +                                        | +                                    |
| Liphardt 2015            | +                                           | ?                                       |                                                                  | ?                                                                       | ?                                               | +                                        | ?                                    |
| Santin-Medeiros 2015     | +                                           | ?                                       |                                                                  | ?                                                                       | ?                                               | ?                                        | ?                                    |
| Sitjà i Rabert 2015      | +                                           | +                                       | -                                                                |                                                                         | +                                               | +                                        | +                                    |
| Verschueren 2004         | +                                           | ?                                       |                                                                  | ?                                                                       | +                                               | ?                                        | +                                    |
| Verschueren 2011         | +                                           | +                                       |                                                                  | ?                                                                       | +                                               | +                                        | ?                                    |
| Von Stegel 2011          | +                                           | ?                                       | ?                                                                | ?                                                                       | +                                               | +                                        | +                                    |
| Von Stegel Elvis II 2011 | +                                           | ?                                       |                                                                  | ?                                                                       | +                                               | +                                        | ?                                    |

Figure 2. The risk of bias assessment.

96x220mm (300 x 300 DPI)

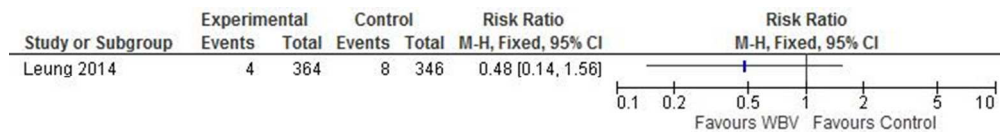

Figure 3. Effect of whole-body vibration (WBV) on the relative risk of experiencing a fracture

186x25mm (300 x 300 DPI)

For peer review only

1  
2  
3  
4  
5  
6  
7  
8  
9  
10  
11  
12  
13  
14  
15  
16  
17  
18  
19  
20  
21  
22  
23  
24  
25  
26  
27  
28  
29  
30  
31  
32  
33  
34  
35  
36  
37  
38  
39  
40  
41  
42  
43  
44  
45  
46  
47  
48  
49  
50  
51  
52  
53  
54  
55  
56  
57  
58  
59  
60

Figure 4-a. The rate ratio of the fall rate/person years

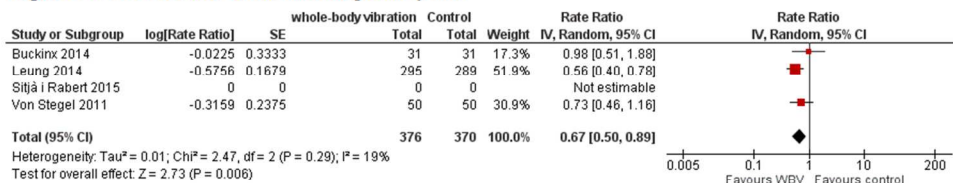

Figure 4-b. The risk ratio of experiencing one or more falls

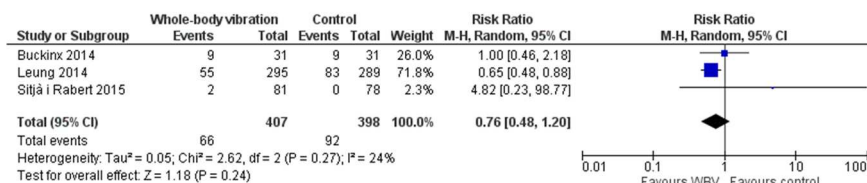

Figure 4. Forest plot of the effect of whole-body vibration (WBV).!! † Figure 4-a. The rate ratio of the fall rate/person years between the WBV and control group. Figure 4-b. The risk ratio of experiencing one or more falls. Area of each square is proportional to study weight in meta-analysis and horizontal lines represent exact 95% confidence intervals. Diamonds represent pooled effect estimates from random effects meta-analysis!! † .

197x103mm (300 x 300 DPI)

Figure 5-a. Mean difference in areal bone mineral density of the lumbar spine

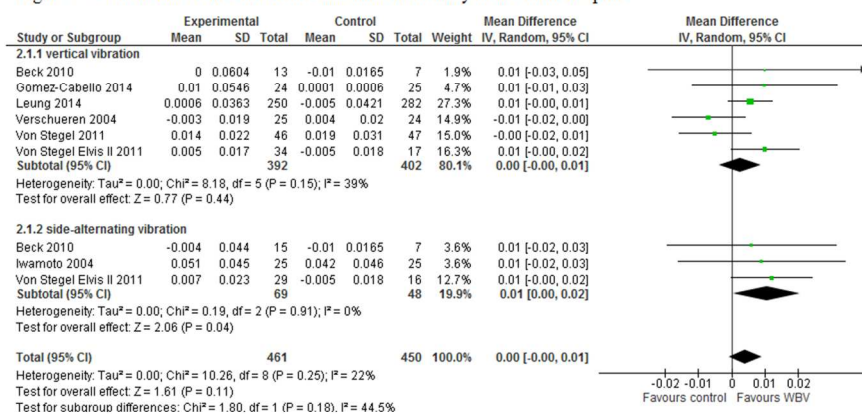

Figure 5-b. Mean difference in areal bone mineral density of total hip

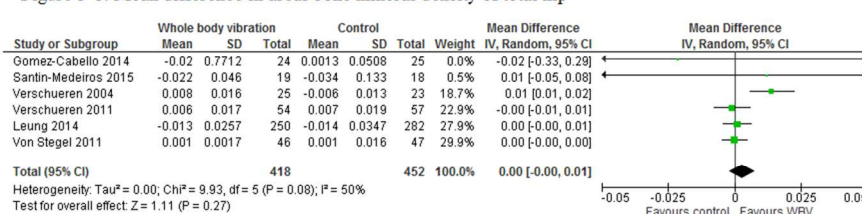

Figure 5-c. Mean difference in volumetric bone mineral density of the distal tibia

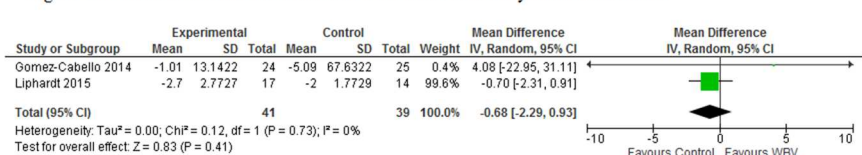

Figure 5-d. Mean difference in volumetric bone mineral density of the distal radius

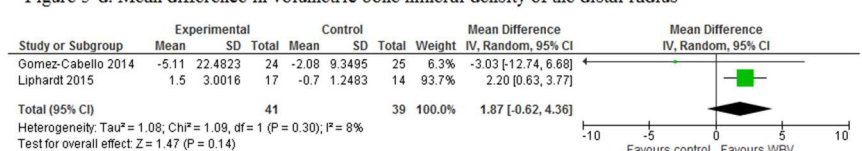

Figure 5. The effect of whole-body vibration exercise (WBV) in forest plots on a) areal bone mineral density (BMD) of the lumbar spine with weighted mean difference and 95% confidence intervals (CI), divided in subgroups with vertical vibration and side-alternating vibration, b) areal BMD in total hip with weighted mean difference and 95% CI, c) volumetric BMD of the distal tibia with weighted mean difference with 95% CI, and d) WBVs effect on volumetric BMD of the distal radius with weighted mean difference and 95% CI. Area of each square is proportional to study weight in meta-analysis and horizontal lines represent exact 95% confidence intervals. Diamonds represent pooled effect estimates from random effects meta-analysis.

201x254mm (300 x 300 DPI)

1  
2  
3  
4  
5  
6  
7  
8  
9  
10  
11  
12  
13  
14  
15  
16  
17  
18  
19  
20  
21  
22  
23  
24  
25  
26  
27  
28  
29  
30  
31  
32  
33  
34  
35  
36  
37  
38  
39  
40  
41  
42  
43  
44  
45  
46  
47  
48  
49  
50  
51  
52  
53  
54  
55  
56  
57  
58  
59  
60

Figure 6-a. Mean difference in bone resorption marker CTX

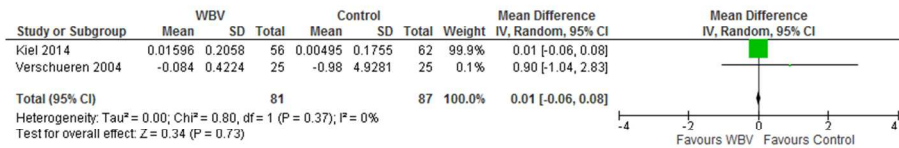

Figure 6-b. Mean difference in bone formation marker P1NP

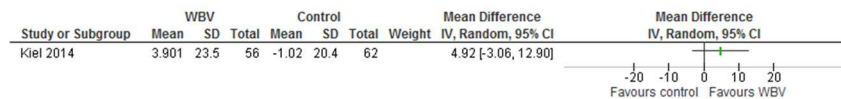

Figure 6. Presents the effect of whole body vibration exercise on bone resorption markers in forest plot with carboxy-terminal collagen crosslink (CTX) and the reported effect on bone formation marker amino terminal propeptide of type I collagen (P1NP). Area of each square is proportional to study weight in meta-analysis and horizontal lines represent exact 95% confidence intervals. Diamonds represent pooled effect estimates from random effects meta-analysis.

201x104mm (300 x 300 DPI)

Review only

1  
2  
3  
4 Appendix  
5

6 Appendix 1. The search string  
7

8 (vibration OR vibrations OR vibratory) AND (Fractures OR fracture OR DXA OR Dual-energy X-  
9 ray absorptiometry OR dual energy x-ray absorptiometry OR dual energy x ray absorptiometry OR  
10 dual-energy X ray absorptiometry OR BMD OR bone mineral density OR bone density OR bone  
11 mass OR bone quality OR bone qualities OR bone formation OR bone turnover OR accidental fall  
12 OR accidental falls OR falls OR fall OR falling OR bone biomarker OR bone biomarkers OR CTX  
13 OR P1NP OR carboxy-terminal collagen crosslink OR carboxy terminal crosslink OR amino-  
14 terminal propeptide of type I collagen OR amino terminal propeptide of type I collagen OR  
15 Calcaneal quantitative ultrasound OR QUS OR Bone Biopsy OR bone biopsies OR HRQCT OR  
16 High resolution peripheral quantitative computed tomography OR HRpQCT OR High resolution  
17 quantitative computed tomography)  
18  
19  
20  
21  
22  
23  
24  
25  
26  
27  
28  
29  
30  
31  
32  
33  
34  
35  
36  
37  
38  
39  
40  
41  
42  
43  
44  
45  
46  
47  
48  
49  
50  
51  
52  
53  
54  
55  
56  
57  
58  
59  
60



Supplement data Figure 1-a. Fall rate ratio/person years including adverse effect data

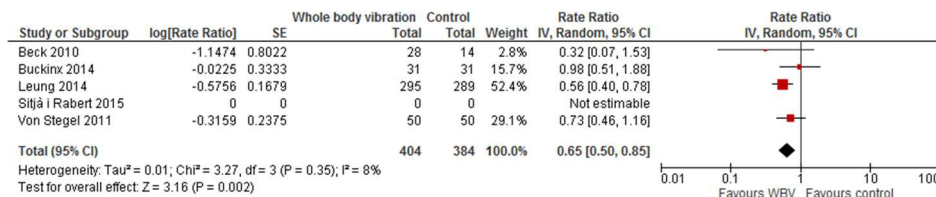

Supplement data Figure 1-b Risk ratio of experiencing falls including adverse effect data

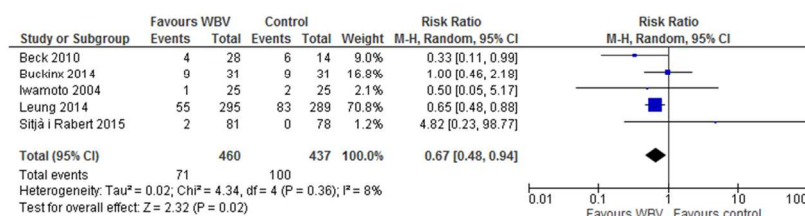

Supplement data Figure 1. presents supplement data on a) fall rate/ person years including adverse effect data on the effect of whole-body vibration (WBV) on rate ratio of the fall rate/person years between the whole-body vibration and control group and b) risk ratio of experiencing one or more falls including adverse effect data. Area of each square is proportional to study weight in meta-analysis and horizontal lines represent exact 95% confidence intervals. Diamonds represent pooled effect estimates from random effects meta-analysis.

201x151mm (300 x 300 DPI)

Figure 2-a. Post hoc subgroup analysis fall rate divided by duration

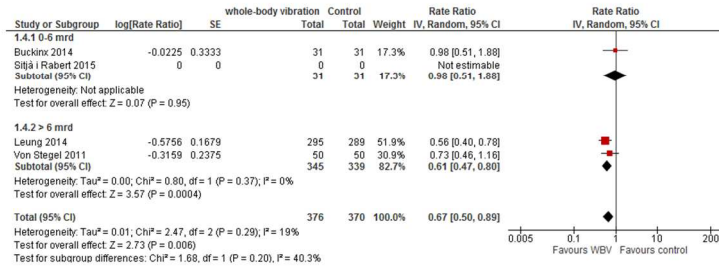

Figure 2-b. Post hoc subgroup fallers vs non fallers divided by duration

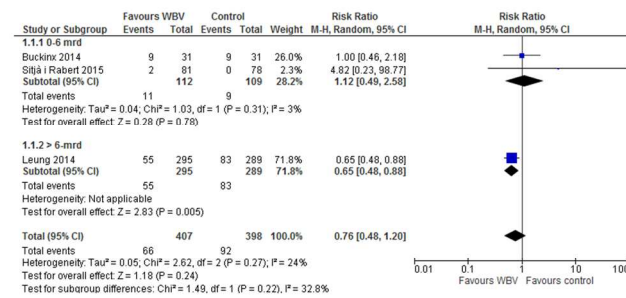

Figure 2-c. post hoc subgroup analysis fall rate ratio divided in High vs low magnitude vibration

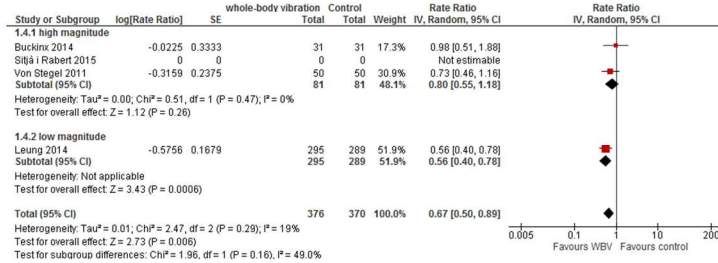

Supplement data Figure 2. presents post hoc subgroup analysis on a) fall rate/ person years divided in interventions of longer duration than six months, b) risk ratio of experiencing one or more falls divided in interventions of longer than six months, c) fall rate/ person years divided in high and low magnitude vibration. Area of each square is proportional to study weight in meta-analysis and horizontal lines represent exact 95% confidence intervals. Diamonds represent pooled effect estimates from random effects meta-analysis.

201x314mm (300 x 300 DPI)

1  
2  
3  
4  
5  
6  
7  
8  
9  
10  
11  
12  
13  
14  
15  
16  
17  
18  
19  
20  
21  
22  
23  
24  
25  
26  
27  
28  
29  
30  
31  
32  
33  
34  
35  
36  
37  
38  
39  
40  
41  
42  
43  
44  
45  
46  
47  
48  
49  
50  
51  
52  
53  
54  
55  
56  
57  
58  
59  
60

Supplement data Figure 3-a. vertebral integral BMD

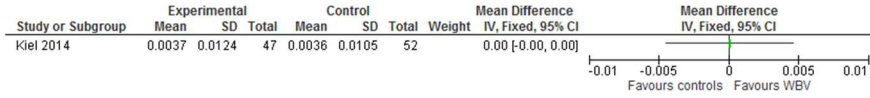

Supplement data Figure 3-b. femoral trabecular BMD

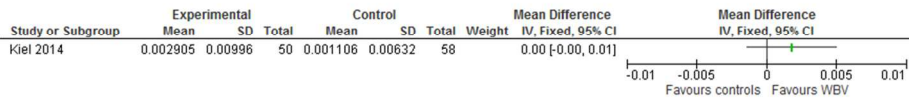

Supplement data Figure 3. Presents supplement data of whole-body vibration exercises (WBV) effect on bone architecture parameters with mean difference and 95% CI. a) mean difference change in vertebral integral bone mineral density and b) mean difference change in total femoral trabecular bone mineral density.

201x104mm (300 x 300 DPI)

review only

Supplement data figure 4-a. total trabecular BMD in tibia

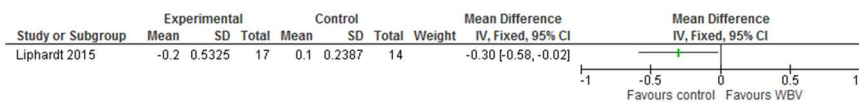

Supplement data figure 4-b. cortical porosity in % in tibia

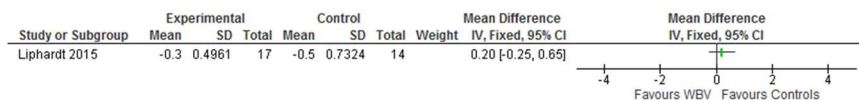

Supplement data figure 4-c. total trabecular BMD in radius

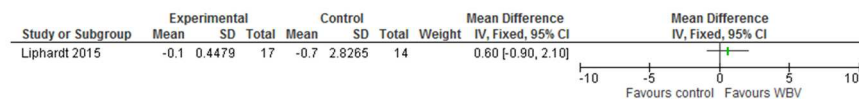

Supplement data figure 4-d. cortical porosity in % in radius

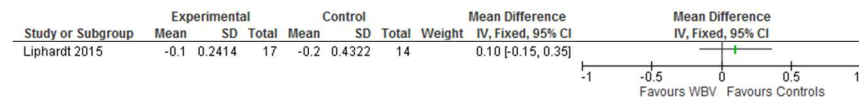

Supplement data Figure 4. presents supplement data analysis for microarchitecture parameters of whole-body vibration exercises (WBV) effect on microarchitecture parameters with mean difference and 95% confidence intervals a.) analyses is with total trabecular BMD in tibia (mg HA/cm<sup>3</sup>), b) cortical porosity in % in tibia, c) total trabecular BMD for radius (mg HA/cm<sup>3</sup>) and d) cortical porosity in % for radius.

201x193mm (300 x 300 DPI)

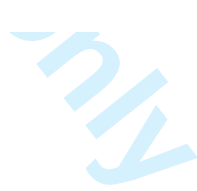

1  
2  
3  
4  
5  
6  
7  
8  
9  
10  
11  
12  
13  
14  
15  
16  
17  
18  
19  
20  
21  
22  
23  
24  
25  
26  
27  
28  
29  
30  
31  
32  
33  
34  
35  
36  
37  
38  
39  
40  
41  
42  
43  
44  
45  
46  
47  
48  
49  
50  
51  
52  
53  
54  
55  
56  
57  
58  
59  
60

Supplement data figure 5. Broadband ultrasound attenuation of calcaneus

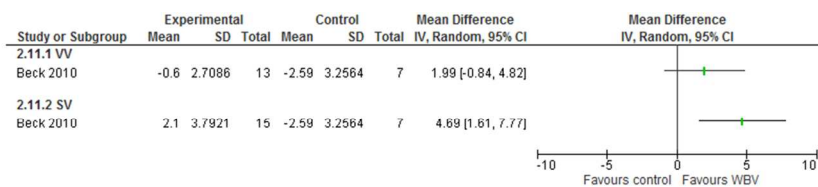

Supplement data Figure 5. presents supplement data of whole-body vibration exercises (WBV) effect on Broadband ultrasound attenuation (BUA) of calcaneus with mean difference and 95% CI. First study line is results from vertical vibration and second line is side alternating vibration, the control group is divided between the two.

201x85mm (300 x 300 DPI)

Peer review only

Supplement data Figure 6-a P1NP

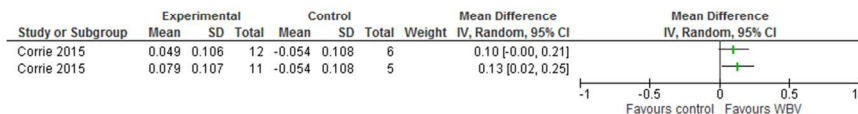

Supplement data Figure 6-b. CTX

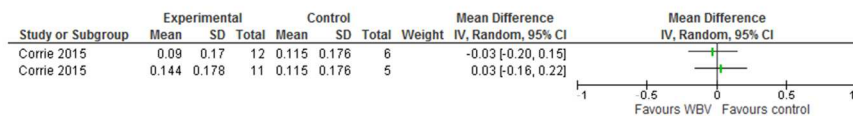

Supplement data Figure 6. presents reported effect on logarithmically transformed data of whole-body vibration exercises (WBV) effect on a) amino terminal propeptide of type I collagen (P1NP) (marker of bone formation) with mean difference and 95% CI, and b) carboxy-terminal collagen crosslink (CTX) (marker of bone resorption) with weighted mean difference with 95% CI. First study line is results from vertical vibration and second line is side alternating vibration, the control group is divided between the two.

201x122mm (300 x 300 DPI)

Review only



# PRISMA 2009 Checklist

1  
2  
3  
4  
5  
6  
7  
8  
9  
10  
11  
12  
13  
14  
15  
16  
17  
18  
19  
20  
21  
22  
23  
24  
25  
26  
27  
28  
29  
30  
31  
32  
33  
34  
35  
36  
37  
38  
39  
40  
41  
42  
43  
44  
45  
46  
47  
48  
49

| Section/topic                      | #  | Checklist item                                                                                                                                                                                                                                                                                              | Reported on page # |
|------------------------------------|----|-------------------------------------------------------------------------------------------------------------------------------------------------------------------------------------------------------------------------------------------------------------------------------------------------------------|--------------------|
| <b>TITLE</b>                       |    |                                                                                                                                                                                                                                                                                                             |                    |
| Title                              | 1  | Identify the report as a systematic review, meta-analysis, or both.                                                                                                                                                                                                                                         | 1                  |
| <b>ABSTRACT</b>                    |    |                                                                                                                                                                                                                                                                                                             |                    |
| Structured summary                 | 2  | Provide a structured summary including, as applicable: background; objectives; data sources; study eligibility criteria, participants, and interventions; study appraisal and synthesis methods; results; limitations; conclusions and implications of key findings; systematic review registration number. | 2                  |
| <b>INTRODUCTION</b>                |    |                                                                                                                                                                                                                                                                                                             |                    |
| Rationale                          | 3  | Describe the rationale for the review in the context of what is already known.                                                                                                                                                                                                                              | 3-4                |
| Objectives                         | 4  | Provide an explicit statement of questions being addressed with reference to participants, interventions, comparisons, outcomes, and study design (PICOS).                                                                                                                                                  | 4-5                |
| <b>METHODS</b>                     |    |                                                                                                                                                                                                                                                                                                             |                    |
| Protocol and registration          | 5  | Indicate if a review protocol exists, if and where it can be accessed (e.g., Web address), and, if available, provide registration information including registration number.                                                                                                                               | 6                  |
| Eligibility criteria               | 6  | Specify study characteristics (e.g., PICOS, length of follow-up) and report characteristics (e.g., years considered, language, publication status) used as criteria for eligibility, giving rationale.                                                                                                      | 4-6                |
| Information sources                | 7  | Describe all information sources (e.g., databases with dates of coverage, contact with study authors to identify additional studies) in the search and date last searched.                                                                                                                                  | 4-5                |
| Search                             | 8  | Present full electronic search strategy for at least one database, including any limits used, such that it could be repeated.                                                                                                                                                                               | appendix           |
| Study selection                    | 9  | State the process for selecting studies (i.e., screening, eligibility, included in systematic review, and, if applicable, included in the meta-analysis).                                                                                                                                                   | 5-6                |
| Data collection process            | 10 | Describe method of data extraction from reports (e.g., piloted forms, independently, in duplicate) and any processes for obtaining and confirming data from investigators.                                                                                                                                  | 5-6                |
| Data items                         | 11 | List and define all variables for which data were sought (e.g., PICOS, funding sources) and any assumptions and simplifications made.                                                                                                                                                                       | 5-6                |
| Risk of bias in individual studies | 12 | Describe methods used for assessing risk of bias of individual studies (including specification of whether this was done at the study or outcome level), and how this information is to be used in any data synthesis.                                                                                      | 5-6                |
| Summary measures                   | 13 | State the principal summary measures (e.g., risk ratio, difference in means).                                                                                                                                                                                                                               | 5-6                |
| Synthesis of results               | 14 | Describe the methods of handling data and combining results of studies, if done, including measures of consistency (e.g., $I^2$ for each meta-analysis).                                                                                                                                                    | 5-6                |

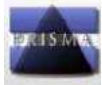

# PRISMA 2009 Checklist

Page 1 of 2

| Section/topic                 | #  | Checklist item                                                                                                                                                                                                                                                       | Reported on page #                     |
|-------------------------------|----|----------------------------------------------------------------------------------------------------------------------------------------------------------------------------------------------------------------------------------------------------------------------|----------------------------------------|
| Risk of bias across studies   | 15 | Specify any assessment of risk of bias that may affect the cumulative evidence (e.g., publication bias, selective reporting within studies).                                                                                                                         | 5-6<br>Table 3                         |
| Additional analyses           | 16 | Describe methods of additional analyses (e.g., sensitivity or subgroup analyses, meta-regression), if done, indicating which were pre-specified.                                                                                                                     | 5-6                                    |
| <b>RESULTS</b>                |    |                                                                                                                                                                                                                                                                      |                                        |
| Study selection               | 17 | Give numbers of studies screened, assessed for eligibility, and included in the review, with reasons for exclusions at each stage, ideally with a flow diagram.                                                                                                      | Figure 1                               |
| Study characteristics         | 18 | For each study, present characteristics for which data were extracted (e.g., study size, PICOS, follow-up period) and provide the citations.                                                                                                                         | Table 1                                |
| Risk of bias within studies   | 19 | Present data on risk of bias of each study and, if available, any outcome level assessment (see item 12).                                                                                                                                                            | Figure 2<br>Table 3                    |
| Results of individual studies | 20 | For all outcomes considered (benefits or harms), present, for each study: (a) simple summary data for each intervention group (b) effect estimates and confidence intervals, ideally with a forest plot.                                                             | Figure 3-6<br>Supplement<br>Figure 1-5 |
| Synthesis of results          | 21 | Present results of each meta-analysis done, including confidence intervals and measures of consistency.                                                                                                                                                              | Figure 3-6                             |
| Risk of bias across studies   | 22 | Present results of any assessment of risk of bias across studies (see Item 15).                                                                                                                                                                                      | Table 3                                |
| Additional analysis           | 23 | Give results of additional analyses, if done (e.g., sensitivity or subgroup analyses, meta-regression [see Item 16]).                                                                                                                                                | Supplement<br>figure 1                 |
| <b>DISCUSSION</b>             |    |                                                                                                                                                                                                                                                                      |                                        |
| Summary of evidence           | 24 | Summarize the main findings including the strength of evidence for each main outcome; consider their relevance to key groups (e.g., healthcare providers, users, and policy makers).                                                                                 | 18-19<br>Table 3                       |
| Limitations                   | 25 | Discuss limitations at study and outcome level (e.g., risk of bias), and at review-level (e.g., incomplete retrieval of identified research, reporting bias).                                                                                                        | 18-20                                  |
| Conclusions                   | 26 | Provide a general interpretation of the results in the context of other evidence, and implications for future research.                                                                                                                                              | 19-20                                  |
| <b>FUNDING</b>                |    |                                                                                                                                                                                                                                                                      |                                        |
| Funding                       | 27 | Describe sources of funding for the systematic review and other support (e.g., supply of data); role of funders for the systematic review only - <a href="http://bmjopen.bmj.com/site/about/guidelines.xhtml">http://bmjopen.bmj.com/site/about/guidelines.xhtml</a> | 20                                     |





# PRISMA 2009 Checklist

1  
2  
3  
4  
5  
6  
7  
8  
9  
10  
11  
12  
13  
14  
15  
16  
17  
18  
19  
20  
21  
22  
23  
24  
25  
26  
27  
28  
29  
30  
31  
32  
33  
34  
35  
36  
37  
38  
39  
40  
41  
42  
43  
44  
45  
46  
47  
48  
49

*From:* Moher D, Liberati A, Tetzlaff J, Altman DG, The PRISMA Group (2009). Preferred Reporting Items for Systematic Reviews and Meta-Analyses: The PRISMA Statement. PLoS Med 6(7): e1000097. doi:10.1371/journal.pmed1000097

For more information, visit: [www.prisma-statement.org](http://www.prisma-statement.org).

Page 2 of 2

For peer review only

# BMJ Open

## Trends and correlates of the public's perception of the healthcare system in the European Union from 2009 to 2013

|                                 |                                                                                                                                                                                                                                                                                                                                                             |
|---------------------------------|-------------------------------------------------------------------------------------------------------------------------------------------------------------------------------------------------------------------------------------------------------------------------------------------------------------------------------------------------------------|
| Journal:                        | <i>BMJ Open</i>                                                                                                                                                                                                                                                                                                                                             |
| Manuscript ID                   | bmjopen-2017-018178.R2                                                                                                                                                                                                                                                                                                                                      |
| Article Type:                   | Research                                                                                                                                                                                                                                                                                                                                                    |
| Date Submitted by the Author:   | 29-Sep-2017                                                                                                                                                                                                                                                                                                                                                 |
| Complete List of Authors:       | AlSaud, AlJohara; Imperial College London, Department of Primary Care and Public Health, School of Public Health<br>Taddese, Henock; Imperial College London, Department of Primary Care and Public Health, School of Public Health<br>Filippidis, Filippos; Imperial College London, Department of Primary Care and Public Health, School of Public Health |
| <b>Primary Subject Heading</b>: | Health services research                                                                                                                                                                                                                                                                                                                                    |
| Secondary Subject Heading:      | Health policy, Public health                                                                                                                                                                                                                                                                                                                                |
| Keywords:                       | Health policy < HEALTH SERVICES ADMINISTRATION & MANAGEMENT, Quality in health care < HEALTH SERVICES ADMINISTRATION & MANAGEMENT, PUBLIC HEALTH                                                                                                                                                                                                            |
|                                 |                                                                                                                                                                                                                                                                                                                                                             |

SCHOLARONE™  
Manuscripts

1  
2  
3 **Trends and correlates of the public's perception of the healthcare system in the**  
4  
5 **European Union from 2009 to 2013**  
6  
7

8  
9  
10 AlJohara M. AlSaud<sup>a</sup>, Henock B. Taddese<sup>a</sup>, Filippos T. Filippidis<sup>a</sup>  
11

12  
13  
14 <sup>a</sup> Department of Primary Care and Public Health, School of Public Health, Imperial College  
15  
16 London, United Kingdom  
17  
18

19  
20  
21 **Corresponding author:**

22  
23 Filippos T Filippidis

24  
25 Address: School of Public Health, Imperial College London, 310 Reynolds Building, St.

26  
27 Dunstan's Road, London W6 8RP, United Kingdom  
28

29  
30 Tel: +44 (0)20 7594 7142

31  
32 Email: f.filippidis@imperial.ac.uk  
33  
34

35  
36 Word count: 3,486

37  
38 Number of tables: 2

39  
40 Number of figures: 2  
41  
42  
43

44  
45 **Competing Interests:**

46  
47 No conflicts of interest have been declared.  
48  
49

50  
51 **Sources of Funding:**

52  
53 This research received no specific grant from any funding agency in the public, commercial or  
54  
55 non-for-profit sectors.  
56  
57  
58  
59  
60

## ABSTRACT

**Objective:** The aim of the study is to assess trends in public perceptions of health systems in 27 European Union (EU) member states following the financial crisis (2009 – 2013), in order to discuss observed changes in the context of the financial crisis.

**Design:** Repeated cross-sectional studies.

**Setting:** 27 EU countries.

**Participants:** EU citizens aged 15 years and older.

**Methods:** The study mainly uses the Eurobarometer Social Climate Surveys, conducted annually between 2009 and 2013, thereby analysing 116,706 observations. A multilevel logistic regression was carried out to analyse trends over time and the factors associated with citizens' perceptions of their healthcare systems.

**Results:** Europeans generally exhibit positive perceptions of their national healthcare systems, 64.0% (95% CI 63.6-64.4%). However, we observed a significant drop in positive perceptions in the years following the crisis, especially within countries most affected by the crisis. Concerning fiscal characteristics, wealthier countries and those dedicating higher proportion of their national income to health were more likely to maintain positive perceptions. At the individual level, perceptions of healthcare systems were significantly associated with respondents' self-perceptions of their social status, financial capacity and overall satisfaction in life.

**Conclusions:** Our finding confirms previous observations that citizens' perceptions of their healthcare systems may reflect their overall prospects within the broader socio-economic systems they live in; which have in-turn been affected by the financial crisis and the policy measures instituted in response.

**Strengths and limitations of this study**

- This study uses a large sample size and includes data from 27 EU countries.
- The cross-sectional nature of the study limits the potential to make causal associations between the crisis and changes in the perceptions.
- The Eurobarometer survey used a single question to assess citizens' perceptions, rather than using composite indices to be able to capture the multidimensional nature of 'public perception', more comprehensively.

## Introduction

The global financial crisis that started in 2008 has precipitated major economic and financial impacts, and prompted austerity policy responses across Europe; majorly austerity and public sector retrenchment policies.[1 2] Most of the healthcare reforms following the financial crisis involved cuts to public services and a related increase in citizens' out-of-pocket expenditure, which in turn affected people's access to care.[1 3] The broader socio-economic effects of the crisis such as rising unemployment, income reduction, increased out of pocket spending (through coinsurance and shared payments) and retrenchment of welfare support were more pronounced in the most affected countries, which had also instituted stringent austerity measures (e.g. Greece, Spain, Ireland and Portugal).[1 4] Whilst a full account of the effects of the crisis in terms of mortality and morbidity rates may take several years, early health effects have already been documented in these countries in the form of rising mental disorders, high suicide rates and deteriorating access to services.[1 4 5] In contrast, some countries followed a different path in their responses to the crisis by implementing a fiscal stimulus package and investing in social protection (Germany) or protecting their health budgets (Belgium, Denmark, the UK).[1]

In light of the above, there is growing interest in studying the consequences of the crisis on health systems, as well as the different trajectories of healthcare systems across countries which may correlate to the differences in the type of policy responses adopted to mitigate the effects of the crisis. In this regard, mortality and morbidity data as well as healthcare access and quality data constitute the primary measures of interest for gauging effects on health systems. Beyond these measures, public perception metrics have also become integral to cross-country and across-time comparisons of health systems; which are in turn a reflection of the shift towards people centered health systems and the corresponding emphasis on responsiveness of

1  
2  
3 health systems.[6 7] Technically, public perception surveys are known to represent a mixture of  
4  
5 citizens' personal experiences with the healthcare system on the one hand, and their broader  
6  
7 views of the system on the other.[8] Unlike satisfaction surveys, where patients are typically  
8  
9 surveyed after an episode of service utilization to evaluate their experiences in receiving care,  
10  
11 the results of public perception surveys are known to be influenced by wide ranging factors:  
12  
13 respondents' views on the general state-of-affairs in the country[8]; the national political debate  
14  
15 around the nature, effectiveness and constitution of the health system; culture of support for the  
16  
17 welfare state in the country; and portrayals of the health system in the media.[6 9] Still, findings  
18  
19 of public perception surveys are used to compare and explain distinct changes over time in  
20  
21 healthcare systems in different countries[6 7]; to validate and argue for the impacts of particular  
22  
23 health policy reforms[10]; to counter expert opinions on the ranking of national health  
24  
25 systems[8]; and to ascertain people's perspectives on aspects of health policy such as levels of  
26  
27 government financing of health care[11].  
28  
29  
30  
31  
32

33  
34 The aim of our study is to assess trends in public perceptions of health systems in 27 European  
35  
36 Union (EU) member states between 2009 and 2013, in order to discuss observed changes in  
37  
38 the context of the financial crisis and the European governments' responses to it.  
39  
40  
41  
42  
43  
44  
45  
46  
47  
48  
49  
50  
51  
52  
53  
54  
55  
56  
57  
58  
59  
60

## Methods

### *Data Sources*

To evaluate EU citizens' perceptions of their healthcare systems, this study used data from the Eurobarometer Social Climate survey between 2009 and 2013 as well as other public data sources. The Eurobarometer is a series of public opinion surveys that consists of approximately 1,000 face-to-face interviews per country with individuals aged 15 years and older.[12]

A multi-stage random (probability) sampling design was applied in all member-states.[13] To ensure the samples are representative of the population, each sample was weighted according to a national weighting procedure for sex, age, and region. Since country samples are approximately the same size (n=1000), population size weighting factors were used to ensure that each country is represented in proportion to its population size.[14] The sample sizes for the countries included in each survey wave are presented in Supplementary Table 1. The specific Eurobarometer waves that were analysed were 71.2 (2009), 73.5 (2010), 75.4 (2011), 77.4 (2012), and 79.4 (2013). Their sample size for each wave were 26,756, 26,691, 26,840, 26,622, and 26,680 respectively.

### *Measures*

The variable representing citizens' perception of the healthcare system is based on the question, 'How would you judge the current situation in each of the following: healthcare provision in (OUR COUNTRY)?'. Responses were dichotomized into 'positive perceptions' ('Very good' and 'Rather good') and 'negative perceptions' ('Very bad' and 'Rather bad'). 'Don't know' responses were treated as missing responses and were excluded from the analysis.



1  
2  
3 The individual-level factors were treated as categorical variables in the model. Age was divided  
4 into seven groups (15-24, 25-34, 35-44, 45-54, 55-64, 65-74, 75 years and older), with the  
5 oldest age group (75 years and older) set as the reference group. Gender was reported as male  
6 and female. Area of residence was divided into three groups ('Rural area or village', 'Small or  
7 middle sized town', and 'Large town') based on self-report. Respondents' marital status was  
8 divided into three categories ('Single', 'Married or Living with a partner', and 'Separated,  
9 Divorced, or Widowed').  
10  
11  
12  
13  
14  
15  
16  
17  
18  
19

20 The Eurobarometer survey lacked a specific question regarding income, whereby the following  
21 question was used as proxy for measuring financial status: 'During the last twelve months,  
22 would you say you had difficulties to pay your bills at the end of the month?'. Possible answers  
23 were categorised into two ('Almost never' vs. 'From time to time' and 'Most of the time'). Self-  
24 perception of respondents' position in society was assessed with a question asking what level  
25 they would place themselves in. The survey offered 10 levels (1 being the lowest level). For  
26 simplicity three categories were created for the purposes of analysis (Low= levels 1-4, Middle=  
27 levels 5-6, High= levels 7-10). Individuals were also asked about their age of completion of full-  
28 time education ( $\leq 15$ , 16-19, 20-22,  $\geq 23$  years old).  
29  
30  
31  
32  
33  
34  
35  
36  
37  
38  
39  
40  
41

42 The Eurobarometer Social Climate survey also asked respondents about their overall  
43 satisfaction with the life they lead. Recent studies have not analyzed this factor in depth,  
44 however Cleary and McNeil[15] suggest a correlation between an individual's satisfaction with  
45 healthcare and their overall life satisfaction. Therefore, the variable was included in the model.  
46 The possible answers respondents could choose from were 'Very satisfied', 'Fairly satisfied',  
47 'Not very satisfied', and 'Not at all satisfied'. The four categories were included in the model,  
48 with 'Not at all satisfied' set as the reference group.  
49  
50  
51  
52  
53  
54  
55  
56  
57  
58  
59  
60

1  
2  
3 Given that various studies have demonstrated an association between citizens' perceptions of  
4 the healthcare system and national level macro-economic and social indicators, we collected  
5 these data from the World Bank and the World Health Organization to include in the analysis.[16  
6  
7  
8  
9  
10 17] GDP per capita, total expenditure on health as % of GDP, and government expenditure on  
11 health as % of total expenditure on health were included in the model and were treated as  
12  
13 continuous variables (Supplementary tables 2 & 3). The GDP variable was recoded so that  
14 results are presented for \$1000 changes in GDP per capita. Government expenditure on health  
15 as % of total expenditure on health was also recoded so that results are presented for a 10%  
16  
17  
18  
19  
20  
21 increase.

### 22 23 24 25 *Statistical Analysis*

26  
27 A multilevel logistic regression (member state being the higher level of analysis) was carried out  
28 in STATA v.13.0 in order to analyze trends over time and the factors associated with citizens'  
29 perceptions of their healthcare system. The dependent variable in the analysis was citizens'  
30 perceptions of the healthcare system. The independent variables included in the model were  
31 year of the survey, gender, age, marital status, area of residence (rural, small town or large  
32 town), employment status, place/level in society, difficulty paying bills, education, life  
33 satisfaction, GDP per capita, total expenditure on health as % of GDP, and government  
34 expenditure on health as % of total expenditure on health. The year variable included in the  
35 model was treated as a categorical variable. The dataset initially included 133,589 observations,  
36 however due to a lack of sufficient data regarding national-level variables, Lithuania was  
37 excluded from the analysis (accounting for 5,135 missing observations). The remainder of the  
38 missing observations related to 'Don't know' responses in the survey, which were also excluded  
39 from the analysis. Survey weights provided in the original Eurobarometer datasets were used in  
40 descriptive analyses, as needed, in order to account for the complexity of the study design.  
41  
42  
43  
44  
45  
46  
47  
48  
49  
50  
51  
52  
53  
54  
55  
56  
57  
58  
59  
60

1  
2  
3 A sensitivity analysis was performed excluding life satisfaction from the model, since the  
4  
5 direction of causality could be debatable. Finally, in order to examine trends in individual  
6  
7 countries and explore differences in citizens' perceptions across the various countries, logistic  
8  
9 regressions were conducted including the 'year' variable and individual-level variables for each  
10  
11 EU member state separately.  
12  
13  
14  
15  
16  
17  
18  
19  
20  
21  
22  
23  
24  
25  
26  
27  
28  
29  
30  
31  
32  
33  
34  
35  
36  
37  
38  
39  
40  
41  
42  
43  
44  
45  
46  
47  
48  
49  
50  
51  
52  
53  
54  
55  
56  
57  
58  
59  
60

For peer review only

## Results

A complete description of survey respondents' socio-demographic characteristics for the corresponding years can be found in Supplementary Table 1. European citizens tend to have a positive perception of their healthcare system, which can be seen in the descriptive statistics presented in Table 1. In 2009, 64.9% of respondents, across the EU, stated that healthcare provision in their country was either 'Very good' or 'Rather good'. This proportion was about the same in 2013, and there appears to be little variation from year to year. The unadjusted relationships between positive perceptions of healthcare provision and socio-demographic characteristics are shown in Table 1, in which the proportion of positive perceptions exceeded 50% in almost all the groups, except for those who stated they were not satisfied with their lives overall. Regarding the national-level variables, there appears to be an increasing trend in the proportion of positive perceptions when moving from the lowest quartile to the highest quartile for GDP per capita, total expenditure on health as % of GDP, and government expenditure on health as % of total expenditure on health.

The number of observations included in the multi-level logistic regression analysis after accounting for missing data was 116,706. Looking at the regression results presented in Table 2, there appears to be significant decrease in positive perceptions. Respondents in 2013 had 15% lower odds (95% CI 10-20%) of having a positive perception of healthcare provision in comparison to respondents in 2009 (p-value <0.001).

With regards to individual-level variables, the unadjusted and adjusted results appear to be compatible. Respondents who had difficulty paying their bills 'sometimes or most of the time' had approximately 20% lower odds (95% CI 16-21%) of reporting that healthcare provision in their country was good when compared to those who 'almost never' had difficulty paying their bills (Table 2). Moreover, self-perceptions of position in society (society level) appear to be

1  
2  
3 positively and significantly related to good perceptions of the healthcare system. Those who  
4  
5 considered themselves to belong to higher ranks in society had 27% higher odds (95% CI 21-  
6  
7 32%) of having good perception than those who placed themselves in a low societal level.  
8  
9 Regarding life satisfaction, individuals who were 'very satisfied' with the life they lead had five  
10  
11 times the odds of having a good perception of healthcare provision, relative to individuals who  
12  
13 were 'not at all satisfied'.  
14  
15

16  
17  
18 GDP per capita and total expenditure on health as a percent of GDP were positively and  
19  
20 significantly associated to good perceptions of healthcare systems. The odds of reporting good  
21  
22 perceptions of the healthcare system increased by 8% (95% CI 7-9%) for every \$1,000 increase  
23  
24 in GDP per capita. A positive association was also evident between total expenditure on health  
25  
26 and healthcare perceptions, in which a 1% increase in total expenditure on health as a percent  
27  
28 of GDP increased the odds that citizens would have a good perception of their healthcare  
29  
30 system by 17% (95% CI 11-24%).  
31  
32  
33  
34  
35  
36

### 37 *Country Specific Results*

38  
39 The proportion of individuals who reported positive perceptions of their country's healthcare  
40  
41 system varied between countries. The unadjusted proportions for each of the countries between  
42  
43 2009 and 2013 can be found in Supplementary Table 4. Overall, data from Belgium, the  
44  
45 Netherlands, Luxembourg, and Austria revealed the highest proportions of positive perceptions.  
46  
47 At the other end of the spectrum were Greece, Bulgaria, and Romania which had the lowest  
48  
49 proportion of respondents reporting positive perceptions (below 30%). Figure 1 illustrates the  
50  
51 change in perceptions across countries over the years, specifically comparing the percent of  
52  
53 respondents with good perceptions of the healthcare system in 2009 and 2013. In examining  
54  
55  
56  
57  
58  
59  
60

1  
2  
3 the results, it is evident that Greece and Spain experienced the greatest drop in positive  
4  
5 perceptions between 2009 and 2013.  
6  
7

8  
9 The results of the regression analyses for both Greece and Spain show that respondents in  
10  
11 2013 had 61% (95% CI 50-70%) and 65% (95% CI 56-72%) lower odds of reporting positive  
12  
13 perceptions than respondents in 2009. In total, in seven member states the odds of positive  
14  
15 perceptions were significantly lower in 2013 compared to 2009; odds of positive perceptions  
16  
17 were higher in 2013 than in 2009 in twelve member states (Figure 2).  
18  
19

20  
21  
22 In the sensitivity analysis, excluding 'life satisfaction' from the model appeared to have the  
23  
24 greatest impact on the association between education and perceptions, as well as employment  
25  
26 status and perceptions. Individuals who completed full-time education at the age of twenty-three  
27  
28 years or older had 12% (95% CI 6-18%) higher odds of reporting good perceptions of  
29  
30 healthcare provision in their country compared to individuals who were fifteen years and below  
31  
32 when they exited full time education or those who had no full-time education. Furthermore, the  
33  
34 direction of the association between employment status and perceptions was reversed in the  
35  
36 sensitivity analysis. The key findings from the regression analysis however were fairly similar to  
37  
38 those in the sensitivity analysis.  
39  
40  
41  
42  
43  
44  
45  
46  
47  
48  
49  
50  
51  
52  
53  
54  
55  
56  
57  
58  
59  
60

## Discussion

### *Main Findings*

We found that there was a reduction in positive perceptions of healthcare systems over the years following the financial crisis in Europe. Our analysis also showed that higher national income per capita and higher spending on health were associated with better perceptions throughout the financial crisis. In addition, we observed starkly different trends among member states over the years following the financial crisis, with those hit the hardest by the financial crisis reporting the greatest declines in positive perceptions.

Our finding that the biggest drop in perceptions has occurred in Spain and Greece is in line with evidence from other studies regarding negative health effects documented so far in these countries.[1 4 5] Conversely, countries such as Germany and Denmark, which have either opted to invest in further social protection or decided to protect public spending on health appear to have seen an improvement in the public's perception of the healthcare systems, although we did not formally test whether national policies were associated with changes in perceptions.

These changes in perceptions may not be entirely informed by people's first-hand experiences of the changes precipitated by the policy choices on the healthcare systems, but may be reflective of the general mood precipitated nationally by these policies, essentially highlighting the role of factors 'external' to the health systems. These external factors include the nature of the political debates around the crisis and proposed policy measures, media representation of the changes, and shifts in the general outlook regarding the overall state-of-affairs in the countries.[6 9] Indeed, perceptions of public expenditure retrenchment can have a major influence on public perception. Wendt et al.[18] found public expenditure on health to be a significant determinant of perceptions, irrespective of whether there was a corresponding increase in other sources of finance, such as the private sector. In addition, total health

1  
2  
3 expenditure has been found to be associated with perceptions of safety in healthcare, which  
4  
5 arguably impacts overall perceptions of the health system.[19]  
6  
7  
8

9  
10 The socio-demographic variables also revealed the importance of factors external to the health  
11 system in influencing people's perception. Positive perceptions were more frequent among  
12 people with no financial difficulties and those who regarded themselves as having high status in  
13 society. Bleich et al.[9] report similar findings and we share their explanation that this is possibly  
14 the result of people drawing on their general outlooks and their prospects in life as they  
15 participate in these surveys. To add further credence to this argument, the strongest association  
16 in our study was found between perceptions of health systems and people's self-reported levels  
17 of satisfaction with life in general. This association between overall outlook on life in general and  
18 perceptions of the state of the health care system has long been recognized. [15] Across the  
19 EU, individuals who were older and had lower social status were also found to be more satisfied  
20 with the health system, findings which have been reported previously with regards to both  
21 patient satisfaction and overall perception of the health system. [20-22] These associations may  
22 be explained by different notions of what qualifies as a good healthcare system among different  
23 population groups. [20] For example, younger and highly educated individuals may expect more  
24 out of their healthcare system leading to lower satisfaction if those expectations are not met.  
25  
26  
27  
28  
29  
30  
31  
32  
33  
34  
35  
36  
37  
38  
39  
40  
41  
42  
43

44 The decline in positive perceptions of healthcare services identified in our regression analysis is  
45 not reflected in the unadjusted estimates, which seem to be fairly stable over time across the  
46 EU. Consistent with previous research, [9] we found that perceptions of healthcare systems  
47 were positively associated with GDP per capita. Almost all member states experienced an  
48 increase in GDP between 2009 and 2013, which may explain the discrepancy between  
49 unadjusted and adjusted results.  
50  
51  
52  
53  
54  
55  
56  
57  
58  
59  
60



### *Strengths and Limitations*

We analysed a multiyear dataset covering 27 EU member states to assess trends in public perceptions of national health systems in the aftermath of the financial crisis of 2008. The study used a large sample size coming from a far larger number of countries than similar studies in the past, which had enrolled utmost 21 countries. This has enabled us to study a wide range of countries, which had contrasting experiences and policy responses to the crisis. The cross-sectional nature of the study limits the potential to make causal associations between the crisis and changes in the perceptions; still, the samples were nationally representative, thereby making comparisons meaningful.

Furthermore, the study is guided by critical understanding of the nature of public perception studies, which stipulate that public perception is at least partly explained by factors external to the health system. Studies have determined that people's direct experiences with the healthcare system merely inform up to 13% of their perceptions of national health systems.[6 9] This has specifically guided the selection of factors chosen to test for associations with people's perceptions of their national health systems as well as in the interpretation of the findings. The Eurobarometer survey used a single question to assess citizens' perceptions, rather than using composite indices to be able to capture the multidimensional nature of 'public perception', more comprehensively.[23] Interpreting single item measures may be quite difficult, given that the dimensions of healthcare provision cannot be fully captured in one question.[23] In this study for instance, respondents may have a different understanding of what qualifies as 'very good' healthcare provision. It is also important to note that we could not compare our findings with trends in views about other services that may have also changed during the study period; hence, we were unable to distinguish trends in views about the healthcare system from overall trends about society.

1  
2  
3  
4  
5  
6  
7  
8  
9  
10  
11  
12  
13  
14  
15  
16  
17  
18  
19  
20  
21  
22  
23  
24  
25  
26  
27  
28  
29  
30  
31  
32  
33  
34  
35  
36  
37  
38  
39  
40  
41  
42  
43  
44  
45  
46  
47  
48  
49  
50  
51  
52  
53  
54  
55  
56  
57  
58  
59  
60

Another limitation of the study was the exclusion of Lithuania from the analysis, due to a lack of sufficient data regarding its national-level indicators. Additionally, 10.1% of all observations had missing values for some of the variables and could not be included in the regression analysis. Chi-square tests were conducted, which revealed significant differences with respect to socio-demographic characteristics between those who were included and those who were excluded from the analysis, which introduces into the study a potential bias due to missing data. This may have affected the associations observed between healthcare perceptions and the individual-level variables analyzed in the study.

### *Policy Implications and Conclusions*

Public perceptions of health systems are considered critical for assessment and comparison of national health systems. Our findings suggest that people's perceptions of their countries' health systems are intertwined with their assessment of their overall wellbeing and prospects more generally. This strongly indicates that perception of health systems cannot be viewed in separation to the overall social and economic outlooks of countries. Countries aiming to improve the public's confidence in their health systems need to frame and propagate policy measures as part of a holistic effort aimed at improving social protection and welfare. Finally, we join previous papers[6 9] in calling for studies exploring the ways in which the factors 'external' to health systems shape the public's perception of health systems.

### **Data sharing statement**

The datasets are publicly available at the GESIS Data Archive at [www.gesis.org](http://www.gesis.org).

1  
2  
3  
4  
5  
6  
7  
8  
9  
10  
11  
12  
13  
14  
15  
16  
17  
18  
19  
20  
21  
22  
23  
24  
25  
26  
27  
28  
29  
30  
31  
32  
33  
34  
35  
36  
37  
38  
39  
40  
41  
42  
43  
44  
45  
46  
47  
48  
49  
50  
51  
52  
53  
54  
55  
56  
57  
58  
59  
60

**Authors' contribution**

FTF conceived the study and AMA conducted the data analysis. AMA, FTF and HBT contributed to data interpretation and manuscript preparation.

**Acknowledgements**

None.

For peer review only

## References

1. Karanikolos M, Mladovsky P, Cylus J, et al. Financial crisis, austerity, and health in Europe. *Lancet* 2013;**381**(9874):1323-31 doi: 10.1016/S0140-6736(13)60102-6[published Online First: Epub Date]].
2. McKee M, Karanikolos M, Belcher P, et al. Austerity: a failed experiment on the people of Europe. *Clin Med (Lond)* 2012;**12**(4):346-50
3. Palladino R, Lee JT, Hone T, et al. The Great Recession And Increased Cost Sharing In European Health Systems. *Health Aff (Millwood)* 2016;**35**(7):1204-13 doi: 10.1377/hlthaff.2015.1170[published Online First: Epub Date]].
4. Simou E, Koutsogeorgou E. Effects of the economic crisis on health and healthcare in Greece in the literature from 2009 to 2013: a systematic review. *Health Policy* 2014;**115**(2-3):111-9 doi: 10.1016/j.healthpol.2014.02.002[published Online First: Epub Date]].
5. Parmar D, Stavropoulou C, Ioannidis JP. Health outcomes during the 2008 financial crisis in Europe: systematic literature review. *BMJ* 2016;**354**:i4588 doi: 10.1136/bmj.i4588[published Online First: Epub Date]].
6. Papanicolas I, Cylus J, Smith PC. An analysis of survey data from eleven countries finds that 'satisfaction' with health system performance means many things. *Health Aff (Millwood)* 2013;**32**(4):734-42 doi: 10.1377/hlthaff.2012.1338[published Online First: Epub Date]].
7. Hero JO, Blendon RJ, Zaslavsky AM, et al. Understanding What Makes Americans Dissatisfied With Their Health Care System: An International Comparison. *Health Aff (Millwood)* 2016;**35**(3):502-9 doi: 10.1377/hlthaff.2015.0978[published Online First: Epub Date]].
8. Blendon RJ, Kim M, Benson JM. The public versus the World Health Organization on health system performance. *Health Aff (Millwood)* 2001;**20**(3):10-20

- 1  
2  
3 9. Bleich SN, Ozaltin E, Murray CK. How does satisfaction with the health-care system relate to  
4  
5 patient experience? Bull World Health Organ 2009;**87**(4):271-8  
6
- 7  
8 10. Grosso AL, Van Ryzin GG. Public management reform and citizen perceptions of the UK  
9  
10 health system. International review of administrative sciences 2012;**78**(3):494-513 doi:  
11  
12 10.1177/0020852312442658[published Online First: Epub Date]].  
13
- 14 11. Kikuzawa S, Olafsdottir S, Pescosolido BA. Similar pressures, different contexts: public  
15  
16 attitudes toward government intervention for health care in 21 nations. J Health Soc  
17  
18 Behav 2008;**49**(4):385-99 doi: 10.1177/002214650804900402[published Online First:  
19  
20 Epub Date]].  
21
- 22 12. European Commission. Special Eurobarometer 429. Attitudes of Europeans towards  
23  
24 tobacco, 2015.  
25
- 26 13. gesis. Eurobarometer Data Service Sampling and Fieldwork Secondary Eurobarometer  
27  
28 Data Service Sampling and Fieldwork 2016. [http://www.gesis.org/eurobarometer-data-](http://www.gesis.org/eurobarometer-data-service/survey-series/standard-special-eb/sampling-and-fieldwork/)  
29  
30 [service/survey-series/standard-special-eb/sampling-and-fieldwork/](http://www.gesis.org/eurobarometer-data-service/survey-series/standard-special-eb/sampling-and-fieldwork/)  
31  
32
- 33 14. gesis. Eurobarometer Data Service Weighting Overview. Secondary Eurobarometer Data  
34  
35 Service Weighting Overview 2016. [http://www.gesis.org/eurobarometer-data-](http://www.gesis.org/eurobarometer-data-service/survey-series/standard-special-eb/weighting-overview/)  
36  
37 [service/survey-series/standard-special-eb/weighting-overview/](http://www.gesis.org/eurobarometer-data-service/survey-series/standard-special-eb/weighting-overview/).  
38  
39
- 40 15. Cleary PD, McNeil BJ. Patient satisfaction as an indicator of quality care. Inquiry  
41  
42 1988;**25**(1):25-36  
43
- 44 16. The World Bank. International Comparison Program database. Secondary International  
45  
46 Comparison Program database 2016.  
47  
48 <http://data.worldbank.org/indicator/NY.GDP.PCAP.PP.CD?view=chart>  
49  
50
- 51 17. WHO. Global Health Observatory Data. Secondary Global Health Observatory Data 2016.  
52  
53 <http://www.who.int/gho/countries/en/>  
54
- 55 18. Wendt C, Kohl J, Mischke M, et al. How do Europeans perceive their healthcare system?  
56  
57 Patterns of satisfaction and preference for state involvement in the field of healthcare.  
58  
59

1  
2  
3 European Sociological Review 2009;**26**(2):177-92 doi: 10.1093/esr/jcp014[published  
4  
5 Online First: Epub Date]].

- 6  
7  
8 19. Filippidis FT, Mian SS, Millett C. Perceptions of quality and safety and experience of  
9  
10 adverse events in 27 European Union healthcare systems, 2009-2013. Int J Qual Health  
11  
12 Care 2016 doi: 10.1093/intqhc/mzw097[published Online First: Epub Date]].
- 13  
14 20. Young GJ, Meterko M, Desai KR. Patient satisfaction with hospital care: effects of  
15  
16 demographic and institutional characteristics. Medical care 2000;**38**(3):325-34  
17  
18  
19 21. Sofaer S, Firminger K. Patient perceptions of the quality of health services. Annual review of  
20  
21 public health 2005;**26**:513-59 doi:  
22  
23 10.1146/annurev.publhealth.25.050503.153958[published Online First: Epub Date]].
- 24  
25 22. Jackson JL, Chamberlin J, Kroenke K. Predictors of patient satisfaction. Social science &  
26  
27 medicine 2001;**52**(4):609-20  
28  
29 23. Hudak PL, Wright JG. The characteristics of patient satisfaction measures. Spine (Phila Pa  
30  
31 1976) 2000;**25**(24):3167-77.  
32  
33  
34  
35  
36  
37  
38  
39  
40  
41  
42  
43  
44  
45  
46  
47  
48  
49  
50  
51  
52  
53  
54  
55  
56  
57  
58  
59  
60

Table 1. Descriptive statistics of positive perceptions of healthcare provision among EU citizens between 2009 and 2013

| Variable                                     | % of respondents with positive perceptions of healthcare provision | 95% Confidence Interval |
|----------------------------------------------|--------------------------------------------------------------------|-------------------------|
| <b>Year</b>                                  |                                                                    |                         |
| 2009                                         | 64.9                                                               | 64.0-65.8               |
| 2010                                         | 64.9                                                               | 64.0-65.8               |
| 2011                                         | 62.9                                                               | 62.0-63.8               |
| 2012                                         | 63.3                                                               | 62.4-64.2               |
| 2013                                         | 64.0                                                               | 63.1-64.9               |
| <b>Gender</b>                                |                                                                    |                         |
| Male                                         | 65.3                                                               | 64.7-65.8               |
| Female                                       | 62.8                                                               | 62.3-63.3               |
| <b>Age</b>                                   |                                                                    |                         |
| 75 years and older                           | 70.1                                                               | 68.8-71.4               |
| 65-74 years                                  | 64.5                                                               | 63.4-65.6               |
| 55-64 years                                  | 61.9                                                               | 60.9-62.8               |
| 45-54 years                                  | 62.2                                                               | 61.2-63.4               |
| 35-44 years                                  | 61.6                                                               | 60.7-62.6               |
| 25-34 years                                  | 62.6                                                               | 61.6-63.6               |
| 15-24 years                                  | 68.9                                                               | 67.8-70.0               |
| <b>Marital Status</b>                        |                                                                    |                         |
| Single                                       | 68.1                                                               | 67.2-68.9               |
| Married or Living with a partner             | 62.9                                                               | 62.3-63.4               |
| Separated/<br>Divorced/Widowed               | 62.3                                                               | 61.4-63.3               |
| <b>Area of Residence</b>                     |                                                                    |                         |
| Rural area or village                        | 63.8                                                               | 63.1-64.4               |
| Small/Middle town                            | 65.3                                                               | 64.6-65.9               |
| Large town                                   | 62.1                                                               | 61.4-62.9               |
| <b>Employment Status</b>                     |                                                                    |                         |
| Unemployed                                   | 57.3                                                               | 55.9-58.7               |
| Not working                                  | 64.8                                                               | 64.2-65.4               |
| Employed                                     | 64.5                                                               | 63.9-65.0               |
| <b>Society Level</b>                         |                                                                    |                         |
| Low                                          | 53.6                                                               | 52.7-54.4               |
| Middle                                       | 65.1                                                               | 64.5-65.7               |
| High                                         | 71.2                                                               | 70.4-71.9               |
| <b>Difficulty Paying Bills</b>               |                                                                    |                         |
| Almost Never                                 | 70.8                                                               | 70.3-71.3               |
| Sometimes or Most of the time                | 53.4                                                               | 52.7-54.0               |
| <b>Education</b>                             |                                                                    |                         |
| 15 years and below or No full time education | 61.6                                                               | 60.7-62.5               |
| 16-19 years                                  | 62.6                                                               | 62.0-63.2               |

|                                                                                     |             |                  |
|-------------------------------------------------------------------------------------|-------------|------------------|
| <b>20-22 years</b>                                                                  | 68.4        | 67.3-69.4        |
| <b>23 years and older</b>                                                           | 68.4        | 67.4-69.3        |
| <b>Life Satisfaction</b>                                                            |             |                  |
| <b>Not at all satisfied</b>                                                         | 26.5        | 24.9-28.1        |
| <b>Not very satisfied</b>                                                           | 39.1        | 38.1-40.1        |
| <b>Fairly satisfied</b>                                                             | 67.4        | 66.9-67.9        |
| <b>Very satisfied</b>                                                               | 82.5        | 81.8-83.2        |
| <b>GDP per capita<br/>(PPP current intl. \$)</b>                                    |             |                  |
| <b>Lower quartile</b>                                                               | 30.0        | 29.3-30.7        |
| <b>2<sup>nd</sup> quartile</b>                                                      | 60.3        | 59.5-61.1        |
| <b>3<sup>rd</sup> quartile</b>                                                      | 71.6        | 71.0-72.3        |
| <b>Upper quartile</b>                                                               | 80.4        | 79.6-81.2        |
| <b>Total expenditure on health<br/>as % of GDP</b>                                  |             |                  |
| <b>Lower quartile</b>                                                               | 32.8        | 32.0-33.6        |
| <b>2<sup>nd</sup> quartile</b>                                                      | 58.8        | 57.8-59.7        |
| <b>3<sup>rd</sup> quartile</b>                                                      | 69.1        | 68.3-69.8        |
| <b>Upper quartile</b>                                                               | 77.5        | 76.9-78.1        |
| <b>Government expenditure on<br/>health as % of total<br/>expenditure on health</b> |             |                  |
| <b>Lower quartile</b>                                                               | 34.4        | 33.8-35.1        |
| <b>2<sup>nd</sup> quartile</b>                                                      | 57.2        | 56.4-58.0        |
| <b>3<sup>rd</sup> quartile</b>                                                      | 67.3        | 66.6-68.0        |
| <b>Upper quartile</b>                                                               | 76.0        | 75.2-76.7        |
| <b>Overall</b>                                                                      | <b>64.0</b> | <b>63.6-64.4</b> |

Notes: Weighted percentages were included in the table; all values were rounded to the first decimal place.



Table 2. Results of multi-level logistic regression illustrating adjusted trends and associations of positive perceptions of healthcare provision among EU citizens between 2009 and 2013

| Variable                                             | Odds Ratio | P-value | 95% Confidence Interval |
|------------------------------------------------------|------------|---------|-------------------------|
| <b>Year</b>                                          |            |         |                         |
| <b>2009*</b>                                         |            |         |                         |
| <b>2010</b>                                          | 0.98       | 0.510   | 0.94-1.03               |
| <b>2011</b>                                          | 0.79       | <0.001  | 0.75-0.84               |
| <b>2012</b>                                          | 0.85       | <0.001  | 0.80-0.90               |
| <b>2013</b>                                          | 0.85       | <0.001  | 0.80-0.90               |
| <b>Gender</b>                                        |            |         |                         |
| <b>Male*</b>                                         |            |         |                         |
| <b>Female</b>                                        | 0.89       | <0.001  | 0.87-0.92               |
| <b>Age</b>                                           |            |         |                         |
| <b>75 years and older*</b>                           |            |         |                         |
| <b>65-74 years</b>                                   | 0.82       | <0.001  | 0.77-0.88               |
| <b>55-64 years</b>                                   | 0.75       | <0.001  | 0.70-0.80               |
| <b>45-54 years</b>                                   | 0.75       | <0.001  | 0.70-0.80               |
| <b>35-44 years</b>                                   | 0.77       | <0.001  | 0.71-0.82               |
| <b>25-34 years</b>                                   | 0.80       | <0.001  | 0.74-0.86               |
| <b>15-24 years</b>                                   | 0.90       | 0.010   | 0.83-0.98               |
| <b>Marital Status</b>                                |            |         |                         |
| <b>Single*</b>                                       |            |         |                         |
| <b>Married or Living with a partner</b>              | 0.93       | 0.001   | 0.89-0.97               |
| <b>Separated/ Divorced/Widowed</b>                   | 0.97       | 0.266   | 0.92-1.02               |
| <b>Area of Residence</b>                             |            |         |                         |
| <b>Rural area or village*</b>                        |            |         |                         |
| <b>Small/Middle town</b>                             | 1.03       | 0.069   | 1.00-1.07               |
| <b>Large town</b>                                    | 1.01       | 0.552   | 0.97-1.05               |
| <b>Employment Status</b>                             |            |         |                         |
| <b>Unemployed*</b>                                   |            |         |                         |
| <b>Not working</b>                                   | 0.98       | 0.551   | 0.93-1.04               |
| <b>Employed</b>                                      | 0.91       | 0.001   | 0.87-0.96               |
| <b>Society Level</b>                                 |            |         |                         |
| <b>Low*</b>                                          |            |         |                         |
| <b>Middle</b>                                        | 1.12       | <0.001  | 1.08-1.16               |
| <b>High</b>                                          | 1.27       | <0.001  | 1.21-1.32               |
| <b>Difficulty Paying Bills</b>                       |            |         |                         |
| <b>Almost never*</b>                                 |            |         |                         |
| <b>Sometimes or Most of the time</b>                 | 0.81       | <0.001  | 0.79-0.84               |
| <b>Education</b>                                     |            |         |                         |
| <b>15 years and below or no full time education*</b> |            |         |                         |
| <b>16-19 years</b>                                   | 0.97       | 0.098   | 0.93-1.01               |
| <b>20-22 years</b>                                   | 1.02       | 0.494   | 0.97-1.08               |
| <b>23 years and older</b>                            | 1.03       | 0.219   | 0.98-1.09               |

|                                                                             |      |        |           |
|-----------------------------------------------------------------------------|------|--------|-----------|
| <b>Life Satisfaction</b>                                                    |      |        |           |
| <b>Not at all satisfied*</b>                                                |      |        |           |
| <b>Not very satisfied</b>                                                   | 1.63 | <0.001 | 1.52-1.75 |
| <b>Fairly satisfied</b>                                                     | 3.56 | <0.001 | 3.33-3.82 |
| <b>Very satisfied</b>                                                       | 5.65 | <0.001 | 5.23-6.10 |
| <b>GDP per capita</b>                                                       | 1.08 | <0.001 | 1.07-1.09 |
| <b>Total expenditure on health as % of GDP</b>                              | 1.17 | <0.001 | 1.11-1.24 |
| <b>Government expenditure on health as % of total expenditure on health</b> | 1.02 | 0.684  | 0.91-1.15 |

\* Reference category

Notes: Odds Ratios (OR) and 95% CI rounded to two decimal places; OR for GDP per capita refers to a \$1000 increase; OR for total expenditure on health as % of GDP refers to a 1% increase; OR for government expenditure on health as % of total expenditure on health refers to a 10% increase.

1  
2  
3  
4  
5  
6  
7  
8  
9  
10  
11  
12  
13  
14  
15  
16  
17  
18  
19  
20  
21  
22  
23  
24  
25  
26  
27  
28  
29  
30  
31  
32  
33  
34  
35  
36  
37  
38  
39  
40  
41  
42  
43  
44  
45  
46  
47  
48  
49  
50  
51  
52  
53  
54  
55  
56  
57  
58  
59  
60

Figure 1. Proportion of respondents with positive perceptions of healthcare provision in 27 EU member-states in 2009 and 2013

For peer review only

1  
2  
3 Figure 2. Adjusted trends (OR and 95% CI) of positive perceptions of healthcare provision for  
4 each of the 27 EU member-states comparing perceptions in 2013 to 2009  
5  
6  
7  
8  
9  
10  
11  
12  
13  
14  
15  
16  
17  
18  
19  
20  
21  
22  
23  
24  
25  
26  
27  
28  
29  
30  
31  
32  
33  
34  
35  
36  
37  
38  
39  
40  
41  
42  
43  
44  
45  
46  
47  
48  
49  
50  
51  
52  
53  
54  
55  
56  
57  
58  
59  
60

For peer review only

1  
2  
3  
4  
5  
6  
7  
8  
9  
10  
11  
12  
13  
14  
15  
16  
17  
18  
19  
20  
21  
22  
23  
24  
25  
26  
27  
28  
29  
30  
31  
32  
33  
34  
35  
36  
37  
38  
39  
40  
41  
42  
43  
44  
45  
46  
47  
48  
49  
50  
51  
52  
53  
54  
55  
56  
57  
58  
59  
60

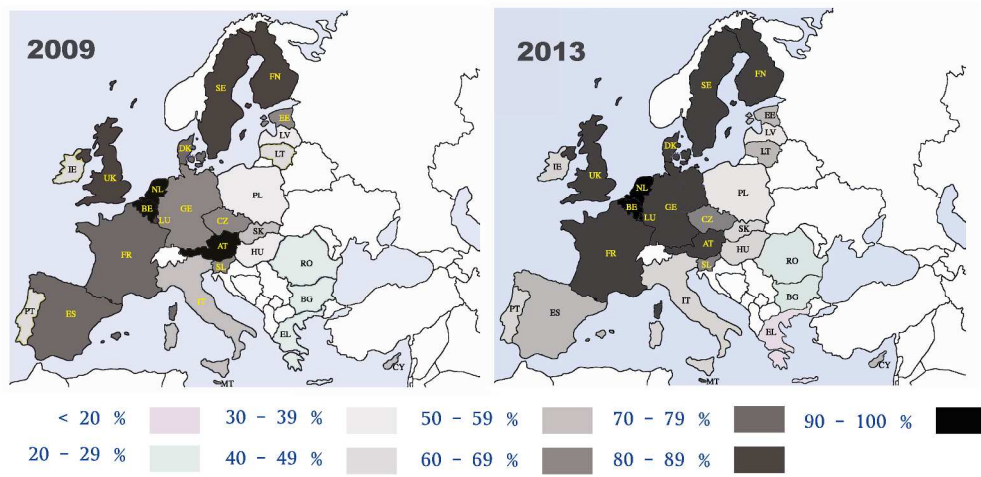

Figure 1. Proportion of respondents with positive perceptions of healthcare provision in 27 EU member-states in 2009 and 2013

279x139mm (300 x 300 DPI)

review only

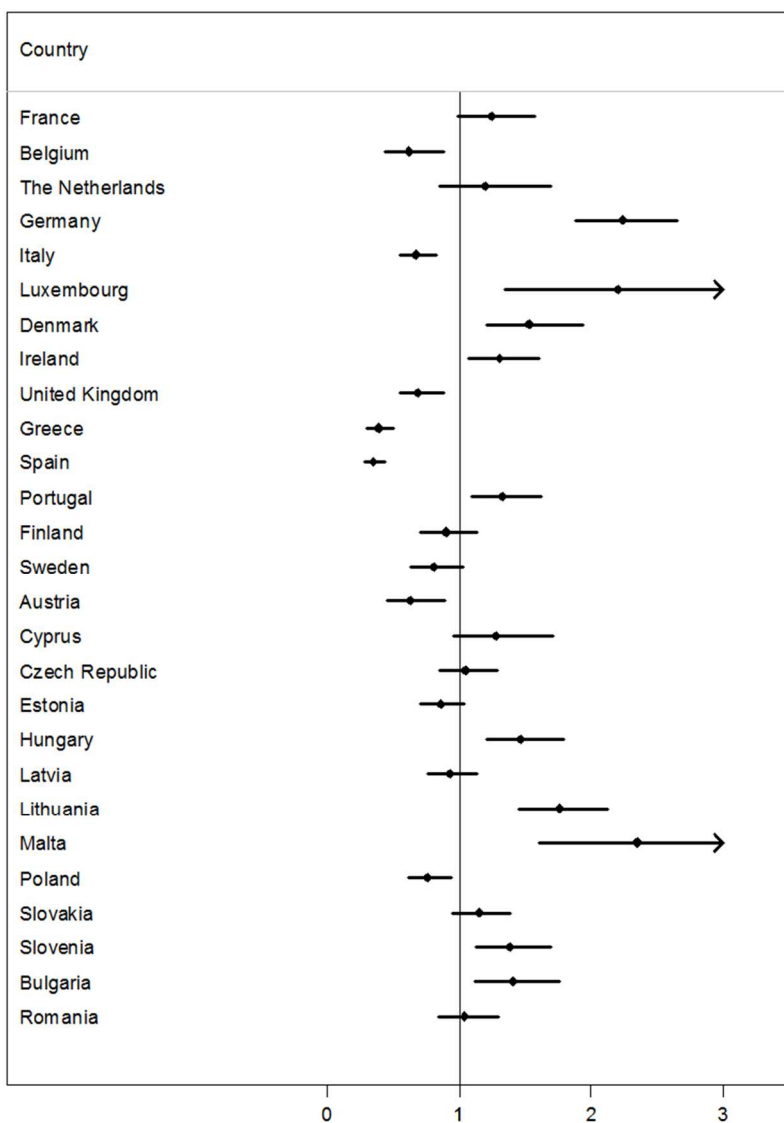

Figure 2. Adjusted trends (OR and 95% CI) of positive perceptions of healthcare provision for each of the 27 EU member-states comparing perceptions in 2013 to 2009

70x94mm (300 x 300 DPI)

Supplementary Table 1. Respondents' socio-demographic characteristics for each survey wave

| Characteristic                                                     | 2009             | 2010             | 2011             | 2012             | 2013             |
|--------------------------------------------------------------------|------------------|------------------|------------------|------------------|------------------|
| <b>Gender</b>                                                      |                  |                  |                  |                  |                  |
| <b>Male (%)</b>                                                    | 48.3 (47.3-49.2) | 48.3 (47.4-49.3) | 48.3 (47.4-49.3) | 48.3 (47.4-49.3) | 48.3 (47.4-49.3) |
| <b>Female (%)</b>                                                  | 51.7 (50.8-52.7) | 51.7 (50.7-52.6) | 51.7 (50.7-52.6) | 51.7 (50.7-52.6) | 51.7 (50.7-52.6) |
| <b>Age in years (mean)</b>                                         | 46.1 (45.8-46.5) | 46.4 (46.0-46.8) | 46.7 (46.3-47.0) | 46.7 (46.4-47.1) | 46.8 (46.5-47.2) |
| <b>Marital Status</b>                                              |                  |                  |                  |                  |                  |
| <b>Single (%)</b>                                                  | 21.8 (21.0-22.6) | 22.3 (21.5-23.1) | 21.6 (20.8-22.4) | 22.1 (21.3-22.9) | 20.4 (19.6-21.2) |
| <b>Married or living with a partner (%)</b>                        | 63.1 (62.2-64.0) | 63.0 (62.1-63.9) | 63.8 (62.9-64.7) | 62.7 (61.8-63.7) | 64.7 (63.8-65.6) |
| <b>Separated/Divorced/Widowed (%)</b>                              | 15.1 (14.4-15.7) | 14.8 (14.1-15.4) | 14.6 (14.0-15.2) | 15.2 (14.6-15.8) | 15.0 (14.4-15.6) |
| <b>Area of Residence</b>                                           |                  |                  |                  |                  |                  |
| <b>Living in rural area or village (%)</b>                         | 34.5 (33.6-35.4) | 34.7 (33.8-35.6) | 33.6 (32.8-34.5) | 32.2 (31.3-33.1) | 32.2 (31.3-33.0) |
| <b>Living in a small/middle town (%)</b>                           | 40.1 (39.2-41.1) | 39.3 (38.4-40.3) | 41.0 (40.1-42.0) | 43.1 (42.1-44.0) | 42.8 (41.9-43.7) |
| <b>Living in a large town (%)</b>                                  | 25.4 (24.6-26.2) | 26.0 (25.2-26.8) | 25.3 (24.6-26.2) | 24.8 (24.0-25.6) | 25.0 (24.3-25.9) |
| <b>Employment Status</b>                                           |                  |                  |                  |                  |                  |
| <b>Unemployed (%)</b>                                              | 8.4 (7.9-9.0)    | 8.2 (7.7-8.7)    | 7.5 (7.0-7.9)    | 9.6 (9.1-10.2)   | 9.8 (9.3-10.4)   |
| <b>Not working (%)</b>                                             | 41.6 (40.7-42.6) | 43.5 (42.6-44.5) | 43.5 (42.5-44.4) | 41.4 (40.5-42.3) | 41.3 (40.4-42.2) |
| <b>Employed (%)</b>                                                | 49.9 (49.0-50.9) | 48.3 (47.4-49.2) | 49.1 (48.1-50.0) | 49.0 (48.0-49.9) | 48.9 (47.9-49.8) |
| <b>Society Level</b>                                               |                  |                  |                  |                  |                  |
| <b>Low (%)</b>                                                     | 23.8 (23.0-24.6) | 22.2 (21.4-23.0) | 20.8 (20.0-21.5) | 23.1 (22.3-23.9) | 23.8 (23.0-24.6) |
| <b>Middle (%)</b>                                                  | 52.3 (51.4-53.3) | 51.3 (50.3-52.2) | 52.1 (51.2-53.1) | 52.4 (51.4-53.4) | 51.8 (50.8-52.7) |
| <b>High (%)</b>                                                    | 23.9 (23.1-24.7) | 26.5 (25.7-27.4) | 27.1 (26.3-27.9) | 24.5 (23.7-25.3) | 24.4 (23.6-25.3) |
| <b>Financial Situation</b>                                         |                  |                  |                  |                  |                  |
| <b>Difficulty paying bills 'almost never' (%)</b>                  | 60.7 (60.0-61.6) | 61.2 (60.3-62.1) | 62.3 (61.4-63.2) | 59.8 (58.8-60.7) | 60.8 (60.0-61.7) |
| <b>Difficulty paying bills 'sometimes or most of the time' (%)</b> | 39.3 (38.4-40.2) | 38.9 (37.9-39.7) | 37.7 (36.8-38.6) | 40.2 (39.3-41.2) | 39.2 (38.3-40.1) |
| <b>Education</b>                                                   |                  |                  |                  |                  |                  |

|                                                                                |                  |                  |                  |                  |                  |
|--------------------------------------------------------------------------------|------------------|------------------|------------------|------------------|------------------|
| <b>Completed education at 15 years and below or no full time education (%)</b> | 24.2 (23.3-25.0) | 23.8 (22.9-24.6) | 24.6 (23.8-25.4) | 22.7 (21.9-23.5) | 20.4 (19.7-21.2) |
| <b>Completed education at 16-19 years of age (%)</b>                           | 47.1 (46.2-48.0) | 47.3 (46.3-48.2) | 46.4 (45.5-47.4) | 47.0 (46.1-48.0) | 48.2 (47.3-49.1) |
| <b>Completed education at 20-22 years of age (%)</b>                           | 14.0 (13.4-14.7) | 13.9 (13.3-14.6) | 13.5 (12.9-14.2) | 14.2 (13.6-14.9) | 14.9 (14.2-15.6) |
| <b>Completed education at 23 years or older (%)</b>                            | 14.7 (14.1-15.4) | 15.1 (14.4-15.7) | 15.4 (14.8-16.1) | 16.1 (15.4-16.8) | 16.5 (15.8-17.2) |
| <b>Life Satisfaction</b>                                                       |                  |                  |                  |                  |                  |
| <b>Not at all satisfied with the life they lead (%)</b>                        | 4.3 (3.9-4.6)    | 5.1 (4.8-5.5)    | 4.4 (4.1-4.7)    | 5.2 (4.8-5.6)    | 5.7 (5.3-6.1)    |
| <b>Not very satisfied with the life they lead (%)</b>                          | 15.8 (15.2-16.5) | 15.4 (14.8-16.1) | 14.0 (13.4-14.7) | 18.4 (17.7-19.1) | 17.1 (16.4-17.8) |
| <b>Fairly satisfied with the life they lead (%)</b>                            | 57.8 (56.9-58.7) | 57.8 (56.9-58.8) | 56.8 (55.9-57.7) | 56.8 (55.8-57.7) | 55.4 (54.5-56.3) |
| <b>Very satisfied with the life they lead (%)</b>                              | 22.1 (21.3-22.9) | 21.6 (20.8-22.4) | 24.8 (24.0-25.6) | 19.6 (18.9-20.4) | 21.8 (21.0-22.6) |

Notes: Weighted percentages were included in the table; all values were rounded to first decimal place; numbers may not add up exactly to 100% due to rounding errors; values in parentheses indicate 95% Confidence Intervals (CI).



Supplementary Table 2. GDP per capita of 27 EU member states between 2009 and 2013

| Country        | 2009    | 2010    | 2011    | 2012    | 2013    |
|----------------|---------|---------|---------|---------|---------|
| France         | 34797.5 | 35891.3 | 37325.3 | 37473.6 | 39209.6 |
| Belgium        | 37629.4 | 39257.8 | 40858.7 | 41927.6 | 43059.8 |
| Netherlands    | 44386.5 | 44773.9 | 46388.3 | 46448.9 | 47954.5 |
| Germany        | 37112.9 | 39639.5 | 42142.5 | 43600.1 | 44184.8 |
| Italy          | 34159.2 | 34740.1 | 35901.3 | 35931.1 | 35761.6 |
| Luxembourg     | 80306.1 | 84589.8 | 91073.3 | 90788.3 | 95928.6 |
| Denmark        | 39612.1 | 41835.8 | 43314.1 | 43873.9 | 45270.1 |
| Ireland        | 41866.5 | 43249.6 | 45673.5 | 46063.3 | 47599.7 |
| United Kingdom | 36361.9 | 35879.8 | 36590.2 | 37569.3 | 39111.2 |
| Greece         | 30652.2 | 28981.4 | 26626.5 | 25980.1 | 26753.1 |
| Spain          | 32796.7 | 32372.9 | 32530.1 | 32235.6 | 32842.4 |
| Portugal       | 26208.9 | 26943   | 26932.4 | 27125.2 | 27929.9 |
| Finland        | 37534.5 | 38322.9 | 40251.4 | 40437.6 | 40831.7 |
| Sweden         | 39657.2 | 41756   | 43709.2 | 44433.7 | 45067.4 |
| Austria        | 40620.4 | 41892.8 | 44022.4 | 45858.2 | 47416.3 |
| Cyprus         | 34087.7 | 33957.9 | 32983   | 31920.4 | 30587.4 |
| Czech Republic | 27008.8 | 27069.6 | 28604.2 | 28727.9 | 30043.6 |
| Estonia        | 20206.2 | 21113.1 | 23954.9 | 25921   | 27169.3 |
| Hungary        | 20860.6 | 21576.7 | 22603.2 | 22701.5 | 24037.2 |
| Latvia         | 17032.9 | 17409.9 | 19450.9 | 21122.3 | 22559   |
| Lithuania      | 18277.9 | 20085.1 | 22541.6 | 24475.1 | 26511.1 |
| Malta          | 25828.6 | 26690   | 28177.5 | 28355.7 | 29525.6 |
| Poland         | 19139.5 | 20883.1 | 22520   | 23598.6 | 24493.8 |
| Slovakia       | 23172.3 | 24515.7 | 25167.5 | 26091.3 | 27414.2 |
| Slovenia       | 27506.3 | 27607.7 | 28513.5 | 28481.7 | 29097.6 |
| Bulgaria       | 14870.8 | 15084.3 | 15603   | 16097.8 | 16573.5 |
| Romania        | 15815.2 | 16579.8 | 17624.5 | 18952   | 19576.6 |

\*Notes: GDP per capita, PPP (current international \$)

Supplementary Table 3. Total expenditure on health as a percentage of GDP for 27 EU member states between 2009 and 2013

| Country        | 2009 | 2010 | 2011 | 2012 | 2013 |
|----------------|------|------|------|------|------|
| France         | 11.6 | 11.6 | 11.5 | 11.6 | 11.7 |
| Belgium        | 10.7 | 10.6 | 10.6 | 10.9 | 11.2 |
| Netherlands    | 11.9 | 12.1 | 12.1 | 12.7 | 12.9 |
| Germany        | 11.8 | 11.7 | 11.2 | 11.3 | 11.3 |
| Italy          | 9.4  | 9.4  | 9.2  | 9.2  | 9.1  |
| Luxembourg     | 8.1  | 7.7  | 7.4  | 7.2  | 7.1  |
| Denmark        | 11.5 | 11.1 | 10.9 | 11   | 10.6 |
| Ireland        | 9.9  | 9.2  | 8.7  | 8.9  | 8.9  |
| United Kingdom | 9.7  | 9.4  | 9.2  | 9.3  | 9.1  |
| Greece         | 10.2 | 9.5  | 9.8  | 9.3  | 9.8  |
| Spain          | 9.6  | 9.6  | 9.4  | 9.3  | 8.9  |
| Portugal       | 10.8 | 10.9 | 10.4 | 9.9  | 9.7  |
| Finland        | 9.2  | 9    | 8.9  | 9.1  | 9.4  |
| Sweden         | 9.9  | 9.5  | 9.5  | 9.6  | 9.7  |
| Austria        | 11.2 | 11.1 | 10.9 | 11.1 | 11   |
| Cyprus         | 7.4  | 7.3  | 7.6  | 7.4  | 7.4  |
| Czech Republic | 7.8  | 7.4  | 7.5  | 7.5  | 7.2  |
| Estonia        | 6.9  | 6.2  | 5.8  | 5.9  | 5.7  |
| Hungary        | 7.7  | 8.1  | 8    | 8    | 8    |
| Latvia         | 6.8  | 6.6  | 6.1  | 5.9  | 5.7  |
| Lithuania      | N/A  | N/A  | N/A  | N/A  | N/A  |
| Malta          | 8.3  | 8.3  | 9.5  | 8.7  | 8.7  |
| Poland         | 7.2  | 7    | 6.9  | 6.8  | 6.7  |
| Slovakia       | 9.2  | 8.5  | 8    | 8.1  | 8.2  |
| Slovenia       | 9.4  | 9.1  | 9.1  | 9.4  | 9.2  |
| Bulgaria       | 7.2  | 7.6  | 7.4  | 7.4  | 7.6  |
| Romania        | 5.6  | 5.9  | 5.6  | 5.6  | 5.3  |

Supplementary Table 4. Proportion of respondents with good perceptions of healthcare provision by country

| Country        | 2009             | 2010             | 2011             | 2012             | 2013             |
|----------------|------------------|------------------|------------------|------------------|------------------|
| France         | 78.9 (76.2-81.3) | 80.5 (77.9-82.9) | 73.7 (70.8-76.3) | 81.3 (78.7-83.6) | 83.0 (80.5-85.2) |
| Belgium        | 94.0 (92.4-95.4) | 92.8 (91.1-94.3) | 94.7 (93.2-95.9) | 95.6 (94.1-96.7) | 90.2 (88.1-92.0) |
| Netherlands    | 91.3 (89.3-92.9) | 89.7 (87.4-91.6) | 89.4 (87.2-91.3) | 91.6 (89.4-93.3) | 92.7 (90.8-94.3) |
| Germany        | 62.4 (59.6-65.1) | 65.7 (62.9-68.5) | 66.2 (63.4-68.9) | 81.2 (78.8-83.4) | 80.8 (78.5-82.9) |
| Italy          | 55.6 (52.4-58.8) | 53.6 (50.5-56.7) | 56.6 (53.5-59.7) | 41.1 (38.0-44.2) | 44.6 (41.5-47.7) |
| Luxembourg     | 87.7 (84.4-90.3) | 93.9 (91.4-95.7) | 91.8 (89.1-93.9) | 93.7 (90.7-95.8) | 94.1 (91.4-96.0) |
| Denmark        | 77.5 (74.7-80.1) | 76.1 (73.3-78.7) | 74.9 (72.0-77.7) | 83.8 (81.2-86.1) | 83.2 (80.5-85.6) |
| Ireland        | 41.4 (38.3-44.6) | 43.3 (40.1-46.6) | 44.5 (41.3-47.7) | 45.4 (42.2-48.7) | 45.5 (42.3-48.7) |
| United Kingdom | 87.3 (85.0-89.3) | 88.5 (86.3-90.4) | 85.0 (82.7-87.1) | 86.5 (84.1-88.6) | 84.0 (81.6-86.2) |
| Greece         | 29.9 (27.1-32.8) | 23.4 (20.8-26.2) | 22.8 (20.2-25.6) | 9.1 (7.5-11.1)   | 13.0 (11.0-15.3) |
| Spain          | 78.9 (76.3-81.4) | 79.5 (76.8-81.9) | 72.9 (70.0-75.6) | 69.2 (66.2-72.0) | 56.3 (53.2-59.4) |
| Portugal       | 46.5 (43.2-49.7) | 39.1 (36.1-42.3) | 46.4 (43.3-49.4) | 35.8 (32.9-38.9) | 47.8 (44.6-50.9) |
| Finland        | 82.7 (80.1-85.0) | 80.3 (77.6-82.8) | 78.4 (75.5-81.0) | 81.7 (78.9-84.2) | 80.9 (78.0-83.5) |
| Sweden         | 84.1 (81.5-86.4) | 85.5 (82.9-87.7) | 78.2 (75.0-81.0) | 87.3 (84.7-89.5) | 82.0 (78.9-84.7) |
| Austria        | 90.5 (88.3-92.3) | 91.8 (89.9-93.4) | 94.1 (92.4-95.5) | 91.0 (88.9-92.6) | 87.6 (85.4-89.6) |
| Cyprus         | 56.9 (52.1-61.5) | 60.4 (55.9-64.7) | 59.5 (55.0-63.7) | 53.2 (48.8-57.6) | 57.0 (52.6-61.3) |
| Czech Republic | 67.2 (64.0-70.3) | 75.3 (72.5-77.9) | 64.5 (61.4-67.4) | 68.6 (65.6-71.4) | 69.4 (66.4-72.1) |
| Estonia        | 61.0 (57.7-64.1) | 63.5 (60.4-66.5) | 59.8 (56.6-62.9) | 63.1 (59.9-66.1) | 56.4 (53.2-59.7) |
| Hungary        | 34.2 (31.2-37.4) | 36.8 (33.8-40.0) | 33.5 (30.6-36.6) | 32.3 (29.4-35.4) | 43.8 (40.7-47.0) |
| Latvia         | 37.2 (34.0-40.5) | 30.8 (27.9-33.8) | 31.8 (29.0-34.8) | 30.1 (27.3-33.1) | 38.5 (35.3-41.9) |
| Lithuania      | 40.6 (37.5-43.7) | 38.6 (35.6-41.7) | 39.6 (36.6-42.7) | 40.0 (36.9-43.1) | 56.0 (52.9-59.1) |
| Malta          | 75.8 (70.9-80.1) | 81.2 (77.2-84.6) | 82.7 (78.9-85.9) | 82.6 (78.7-86.0) | 88.8 (85.3-91.6) |
| Poland         | 37.4 (34.2-40.7) | 33.2 (30.2-36.4) | 32.6 (29.5-35.8) | 21.4 (18.8-24.4) | 30.6 (27.6-33.8) |
| Slovakia       | 50.1 (46.7-53.5) | 58.5 (55.4-61.5) | 39.0 (35.8-42.3) | 43.2 (39.9-46.5) | 49.0 (45.8-52.3) |

|                 |                         |                         |                         |                         |                         |
|-----------------|-------------------------|-------------------------|-------------------------|-------------------------|-------------------------|
| <b>Slovenia</b> | 62.1 (58.9-65.2)        | 66.7 (63.7-69.7)        | 68.9 (65.9-71.8)        | 71.0 (68.1-73.8)        | 68.7 (65.7-71.5)        |
| <b>Bulgaria</b> | 23.3 (20.6-26.1)        | 25.9 (23.1-28.8)        | 28.6 (25.8-31.5)        | 22.3 (19.7-25.1)        | 29.2 (26.3-32.2)        |
| <b>Romania</b>  | 26.4 (23.6-29.4)        | 17.1 (14.8-19.6)        | 13.0 (11.1-15.2)        | 19.1 (16.7-21.8)        | 26.6 (23.9-29.5)        |
| <b>Overall</b>  | <b>64.9 (64.0-65.8)</b> | <b>64.9 (64.0-65.8)</b> | <b>62.9 (62.0-63.8)</b> | <b>63.3 (62.4-64.2)</b> | <b>64.0 (63.1-64.9)</b> |

Notes: Weighted percentages were included in the table (special weights were used for Germany and the UK respectively); All values rounded to one decimal place; values in parentheses indicate 95% confidence intervals.

For peer review only

STROBE Statement—Checklist of items that should be included in reports of *cross-sectional studies*

|                              | Item No | Recommendation                                                                                                                                                                                    | Reported on page |
|------------------------------|---------|---------------------------------------------------------------------------------------------------------------------------------------------------------------------------------------------------|------------------|
| <b>Title and abstract</b>    | 1       | (a) Indicate the study's design with a commonly used term in the title or the abstract                                                                                                            | 2                |
|                              |         | (b) Provide in the abstract an informative and balanced summary of what was done and what was found                                                                                               |                  |
| <b>Introduction</b>          |         |                                                                                                                                                                                                   |                  |
| Background/rationale         | 2       | Explain the scientific background and rationale for the investigation being reported                                                                                                              | 4                |
| Objectives                   | 3       | State specific objectives, including any prespecified hypotheses                                                                                                                                  | 5                |
| <b>Methods</b>               |         |                                                                                                                                                                                                   |                  |
| Study design                 | 4       | Present key elements of study design early in the paper                                                                                                                                           | 6, 7             |
| Setting                      | 5       | Describe the setting, locations, and relevant dates, including periods of recruitment, exposure, follow-up, and data collection                                                                   | 6, 7             |
| Participants                 | 6       | (a) Give the eligibility criteria, and the sources and methods of selection of participants                                                                                                       | 6, 7             |
| Variables                    | 7       | Clearly define all outcomes, exposures, predictors, potential confounders, and effect modifiers. Give diagnostic criteria, if applicable                                                          | 6-8              |
| Data sources/<br>measurement | 8*      | For each variable of interest, give sources of data and details of methods of assessment (measurement). Describe comparability of assessment methods if there is more than one group              | 6-8              |
| Bias                         | 9       | Describe any efforts to address potential sources of bias                                                                                                                                         | 8-9              |
| Study size                   | 10      | Explain how the study size was arrived at                                                                                                                                                         | 6                |
| Quantitative variables       | 11      | Explain how quantitative variables were handled in the analyses. If applicable, describe which groupings were chosen and why                                                                      | 7-9              |
| Statistical methods          | 12      | (a) Describe all statistical methods, including those used to control for confounding                                                                                                             | 8-9              |
|                              |         | (b) Describe any methods used to examine subgroups and interactions                                                                                                                               | 8-9              |
|                              |         | (c) Explain how missing data were addressed                                                                                                                                                       | 8                |
|                              |         | (d) If applicable, describe analytical methods taking account of sampling strategy                                                                                                                | 8                |
|                              |         | (e) Describe any sensitivity analyses                                                                                                                                                             | 9                |
| <b>Results</b>               |         |                                                                                                                                                                                                   |                  |
| Participants                 | 13*     | (a) Report numbers of individuals at each stage of study—eg numbers potentially eligible, examined for eligibility, confirmed eligible, included in the study, completing follow-up, and analysed | n/a              |
|                              |         | (b) Give reasons for non-participation at each stage                                                                                                                                              | n/a              |
|                              |         | (c) Consider use of a flow diagram                                                                                                                                                                | n/a              |
| Descriptive data             | 14*     | (a) Give characteristics of study participants (eg demographic, clinical, social) and information on exposures and potential confounders                                                          | Sup.<br>Table 1  |
|                              |         | (b) Indicate number of participants with missing data for each variable of interest                                                                                                               | Sup.<br>Table 1  |
| Outcome data                 | 15*     | Report numbers of outcome events or summary measures                                                                                                                                              | n/a              |
| Main results                 | 16      | (a) Give unadjusted estimates and, if applicable, confounder-adjusted estimates and their precision (eg, 95% confidence interval). Make clear                                                     | Tables 2         |

|                          |    |                                                                                                                                                                            |       |
|--------------------------|----|----------------------------------------------------------------------------------------------------------------------------------------------------------------------------|-------|
|                          |    | which confounders were adjusted for and why they were included                                                                                                             |       |
|                          |    | (b) Report category boundaries when continuous variables were categorized                                                                                                  | 7-8   |
|                          |    | (c) If relevant, consider translating estimates of relative risk into absolute risk for a meaningful time period                                                           | n/a   |
| Other analyses           | 17 | Report other analyses done—eg analyses of subgroups and interactions, and sensitivity analyses                                                                             | 12    |
| <b>Discussion</b>        |    |                                                                                                                                                                            |       |
| Key results              | 18 | Summarise key results with reference to study objectives                                                                                                                   | 13    |
| Limitations              | 19 | Discuss limitations of the study, taking into account sources of potential bias or imprecision. Discuss both direction and magnitude of any potential bias                 | 14-15 |
| Interpretation           | 20 | Give a cautious overall interpretation of results considering objectives, limitations, multiplicity of analyses, results from similar studies, and other relevant evidence | 15-16 |
| Generalisability         | 21 | Discuss the generalisability (external validity) of the study results                                                                                                      | 15    |
| <b>Other information</b> |    |                                                                                                                                                                            |       |
| Funding                  | 22 | Give the source of funding and the role of the funders for the present study and, if applicable, for the original study on which the present article is based              | 1     |

\*Give information separately for exposed and unexposed groups.

**Note:** An Explanation and Elaboration article discusses each checklist item and gives methodological background and published examples of transparent reporting. The STROBE checklist is best used in conjunction with this article (freely available on the Web sites of PLoS Medicine at <http://www.plosmedicine.org/>, Annals of Internal Medicine at <http://www.annals.org/>, and Epidemiology at <http://www.epidem.com/>). Information on the STROBE Initiative is available at [www.strobe-statement.org](http://www.strobe-statement.org).

# BMJ Open

## Trends and correlates of the public's perception of the healthcare system in the European Union: a multi-level analysis of Eurobarometer survey data from 2009 to 2013

|                                 |                                                                                                                                                                                                                                                                                                                                                             |
|---------------------------------|-------------------------------------------------------------------------------------------------------------------------------------------------------------------------------------------------------------------------------------------------------------------------------------------------------------------------------------------------------------|
| Journal:                        | <i>BMJ Open</i>                                                                                                                                                                                                                                                                                                                                             |
| Manuscript ID                   | bmjopen-2017-018178.R3                                                                                                                                                                                                                                                                                                                                      |
| Article Type:                   | Research                                                                                                                                                                                                                                                                                                                                                    |
| Date Submitted by the Author:   | 08-Nov-2017                                                                                                                                                                                                                                                                                                                                                 |
| Complete List of Authors:       | AlSaud, AlJohara; Imperial College London, Department of Primary Care and Public Health, School of Public Health<br>Taddese, Henock; Imperial College London, Department of Primary Care and Public Health, School of Public Health<br>Filippidis, Filippos; Imperial College London, Department of Primary Care and Public Health, School of Public Health |
| <b>Primary Subject Heading</b>: | Health services research                                                                                                                                                                                                                                                                                                                                    |
| Secondary Subject Heading:      | Health policy, Public health                                                                                                                                                                                                                                                                                                                                |
| Keywords:                       | Health policy < HEALTH SERVICES ADMINISTRATION & MANAGEMENT, Quality in health care < HEALTH SERVICES ADMINISTRATION & MANAGEMENT, PUBLIC HEALTH                                                                                                                                                                                                            |
|                                 |                                                                                                                                                                                                                                                                                                                                                             |

SCHOLARONE™  
Manuscripts

1  
2  
3 **Trends and correlates of the public's perception of the healthcare system in the**  
4  
5 **European Union: a multi-level analysis of Eurobarometer survey data from 2009 to 2013**  
6  
7

8  
9  
10 AlJohara M. AlSaud<sup>a</sup>, Henock B. Taddese<sup>a</sup>, Filippos T. Filippidis<sup>a</sup>  
11

12  
13  
14 <sup>a</sup> Department of Primary Care and Public Health, School of Public Health, Imperial College  
15  
16 London, United Kingdom  
17  
18

19  
20  
21 **Corresponding author:**

22  
23 Filippos T Filippidis

24  
25 Address: School of Public Health, Imperial College London, 310 Reynolds Building, St.

26  
27 Dunstan's Road, London W6 8RP, United Kingdom  
28

29  
30 Tel: +44 (0)20 7594 7142

31  
32 Email: f.filippidis@imperial.ac.uk  
33  
34

35  
36 Word count: 3,486

37  
38 Number of tables: 2

39  
40 Number of figures: 2  
41  
42  
43

44  
45 **Competing Interests:**

46  
47 No conflicts of interest have been declared.  
48  
49

50  
51 **Sources of Funding:**

52  
53 This research received no specific grant from any funding agency in the public, commercial or  
54  
55 non-for-profit sectors.  
56  
57  
58  
59  
60



## ABSTRACT

**Objective:** The aim of the study is to assess trends in public perceptions of health systems in 27 European Union (EU) member states following the financial crisis (2009 – 2013), in order to discuss observed changes in the context of the financial crisis.

**Design:** Repeated cross-sectional studies.

**Setting:** 27 EU countries.

**Participants:** EU citizens aged 15 years and older.

**Methods:** The study mainly uses the Eurobarometer Social Climate Surveys, conducted annually between 2009 and 2013, thereby analysing 116,706 observations. A multilevel logistic regression was carried out to analyse trends over time and the factors associated with citizens' perceptions of their healthcare systems.

**Results:** Europeans generally exhibit positive perceptions of their national healthcare systems, 64.0% (95% CI 63.6-64.4%). However, we observed a significant drop in positive perceptions in the years following the crisis, especially within countries most affected by the crisis. Concerning fiscal characteristics, wealthier countries and those dedicating higher proportion of their national income to health were more likely to maintain positive perceptions. At the individual level, perceptions of healthcare systems were significantly associated with respondents' self-perceptions of their social status, financial capacity and overall satisfaction in life.

**Conclusions:** Our finding confirms previous observations that citizens' perceptions of their healthcare systems may reflect their overall prospects within the broader socio-economic systems they live in; which have in-turn been affected by the financial crisis and the policy measures instituted in response.

**Strengths and limitations of this study**

- This study uses a large sample size and includes data from 27 EU countries.
- The cross-sectional nature of the study limits the potential to make causal associations between the crisis and changes in the perceptions.
- The Eurobarometer survey used a single question to assess citizens' perceptions, rather than using composite indices to be able to capture the multidimensional nature of 'public perception', more comprehensively.

## Introduction

The global financial crisis that started in 2008 has precipitated major economic and financial impacts, and prompted austerity policy responses across Europe; majorly austerity and public sector retrenchment policies.[1 2] Most of the healthcare reforms following the financial crisis involved cuts to public services and a related increase in citizens' out-of-pocket expenditure, which in turn affected people's access to care.[1 3] The broader socio-economic effects of the crisis such as rising unemployment, income reduction, increased out of pocket spending (through coinsurance and shared payments) and retrenchment of welfare support were more pronounced in the most affected countries, which had also instituted stringent austerity measures (e.g. Greece, Spain, Ireland and Portugal).[1 4] Whilst a full account of the effects of the crisis in terms of mortality and morbidity rates may take several years, early health effects have already been documented in these countries in the form of rising mental disorders, high suicide rates and deteriorating access to services.[1 4 5] In contrast, some countries followed a different path in their responses to the crisis by implementing a fiscal stimulus package and investing in social protection (Germany) or protecting their health budgets (Belgium, Denmark, the UK).[1]

In light of the above, there is growing interest in studying the consequences of the crisis on health systems, as well as the different trajectories of healthcare systems across countries which may correlate to the differences in the type of policy responses adopted to mitigate the effects of the crisis. In this regard, mortality and morbidity data as well as healthcare access and quality data constitute the primary measures of interest for gauging effects on health systems. Beyond these measures, public perception metrics have also become integral to cross-country and across-time comparisons of health systems; which are in turn a reflection of the shift towards people centered health systems and the corresponding emphasis on responsiveness of

1  
2  
3 health systems.[6 7] Technically, public perception surveys are known to represent a mixture of  
4  
5 citizens' personal experiences with the healthcare system on the one hand, and their broader  
6  
7 views of the system on the other.[8] Unlike satisfaction surveys, where patients are typically  
8  
9 surveyed after an episode of service utilization to evaluate their experiences in receiving care,  
10  
11 the results of public perception surveys are known to be influenced by wide ranging factors:  
12  
13 respondents' views on the general state-of-affairs in the country[8]; the national political debate  
14  
15 around the nature, effectiveness and constitution of the health system; culture of support for the  
16  
17 welfare state in the country; and portrayals of the health system in the media.[6 9] Still, findings  
18  
19 of public perception surveys are used to compare and explain distinct changes over time in  
20  
21 healthcare systems in different countries[6 7]; to validate and argue for the impacts of particular  
22  
23 health policy reforms[10]; to counter expert opinions on the ranking of national health  
24  
25 systems[8]; and to ascertain people's perspectives on aspects of health policy such as levels of  
26  
27 government financing of health care[11].  
28  
29  
30  
31  
32

33 The aim of our study is to assess trends in public perceptions of health systems in 27 European  
34  
35 Union (EU) member states between 2009 and 2013, in order to discuss observed changes in  
36  
37 the context of the financial crisis and the European governments' responses to it.  
38  
39  
40  
41  
42  
43  
44  
45  
46  
47  
48  
49  
50  
51  
52  
53  
54  
55  
56  
57  
58  
59  
60

## Methods

### *Data Sources*

To evaluate EU citizens' perceptions of their healthcare systems, this study used data from the Eurobarometer Social Climate survey between 2009 and 2013 as well as other public data sources. The Eurobarometer is a series of public opinion surveys that consists of approximately 1,000 face-to-face interviews per country with individuals aged 15 years and older.[12]

A multi-stage random (probability) sampling design was applied in all member-states.[13] To ensure the samples are representative of the population, each sample was weighted according to a national weighting procedure for sex, age, and region. Since country samples are approximately the same size (n=1000), population size weighting factors were used to ensure that each country is represented in proportion to its population size.[14] The sample sizes for the countries included in each survey wave are presented in Supplementary Table 1. The specific Eurobarometer waves that were analysed were 71.2 (2009), 73.5 (2010), 75.4 (2011), 77.4 (2012), and 79.4 (2013). Their sample size for each wave were 26,756, 26,691, 26,840, 26,622, and 26,680 respectively.

### *Measures*

The variable representing citizens' perception of the healthcare system is based on the question, 'How would you judge the current situation in each of the following: healthcare provision in (OUR COUNTRY)?'. Responses were dichotomized into 'positive perceptions' ('Very good' and 'Rather good') and 'negative perceptions' ('Very bad' and 'Rather bad'). 'Don't know' responses were treated as missing responses and were excluded from the analysis.

1  
2  
3 The individual-level factors were treated as categorical variables in the model. Age was divided  
4 into seven groups (15-24, 25-34, 35-44, 45-54, 55-64, 65-74, 75 years and older), with the  
5 oldest age group (75 years and older) set as the reference group. Gender was reported as male  
6 and female. Area of residence was divided into three groups ('Rural area or village', 'Small or  
7 middle sized town', and 'Large town') based on self-report. Respondents' marital status was  
8 divided into three categories ('Single', 'Married or Living with a partner', and 'Separated,  
9 Divorced, or Widowed').  
10  
11  
12  
13  
14  
15  
16  
17  
18  
19

20 The Eurobarometer survey lacked a specific question regarding income, whereby the following  
21 question was used as proxy for measuring financial status: 'During the last twelve months,  
22 would you say you had difficulties to pay your bills at the end of the month?'. Possible answers  
23 were categorised into two ('Almost never' vs. 'From time to time' and 'Most of the time'). Self-  
24 perception of respondents' position in society was assessed with a question asking what level  
25 they would place themselves in. The survey offered 10 levels (1 being the lowest level). For  
26 simplicity three categories were created for the purposes of analysis (Low= levels 1-4, Middle=  
27 levels 5-6, High= levels 7-10). Individuals were also asked about their age of completion of full-  
28 time education ( $\leq 15$ , 16-19, 20-22,  $\geq 23$  years old).  
29  
30  
31  
32  
33  
34  
35  
36  
37  
38  
39  
40  
41

42 The Eurobarometer Social Climate survey also asked respondents about their overall  
43 satisfaction with the life they lead. Recent studies have not analyzed this factor in depth,  
44 however Cleary and McNeil[15] suggest a correlation between an individual's satisfaction with  
45 healthcare and their overall life satisfaction. Therefore, the variable was included in the model.  
46 The possible answers respondents could choose from were 'Very satisfied', 'Fairly satisfied',  
47 'Not very satisfied', and 'Not at all satisfied'. The four categories were included in the model,  
48 with 'Not at all satisfied' set as the reference group.  
49  
50  
51  
52  
53  
54  
55  
56  
57  
58  
59  
60

1  
2  
3 Given that various studies have demonstrated an association between citizens' perceptions of  
4 the healthcare system and national level macro-economic and social indicators, we collected  
5 these data from the World Bank and the World Health Organization to include in the analysis.[16  
6  
7  
8  
9  
10 17] GDP per capita, total expenditure on health as % of GDP, and government expenditure on  
11 health as % of total expenditure on health were included in the model and were treated as  
12 continuous variables (Supplementary tables 2 & 3). The GDP variable was recoded so that  
13 results are presented for \$1000 changes in GDP per capita. Government expenditure on health  
14 as % of total expenditure on health was also recoded so that results are presented for a 10%  
15  
16  
17  
18  
19  
20  
21 increase.

### 22 23 24 25 *Statistical Analysis*

26  
27 A multilevel logistic regression (member state being the higher level of analysis) was carried out  
28 in STATA v.13.0 in order to analyze trends over time and the factors associated with citizens'  
29 perceptions of their healthcare system. The dependent variable in the analysis was citizens'  
30 perceptions of the healthcare system. The independent variables included in the model were  
31 year of the survey, gender, age, marital status, area of residence (rural, small town or large  
32 town), employment status, place/level in society, difficulty paying bills, education, life  
33 satisfaction, GDP per capita, total expenditure on health as % of GDP, and government  
34 expenditure on health as % of total expenditure on health. The year variable included in the  
35 model was treated as a categorical variable. The dataset initially included 133,589 observations,  
36 however due to a lack of sufficient data regarding national-level variables, Lithuania was  
37 excluded from the analysis (accounting for 5,135 missing observations). The remainder of the  
38 missing observations related to 'Don't know' responses in the survey, which were also excluded  
39 from the analysis. Survey weights provided in the original Eurobarometer datasets were used in  
40 descriptive analyses, as needed, in order to account for the complexity of the study design.  
41  
42  
43  
44  
45  
46  
47  
48  
49  
50  
51  
52  
53  
54  
55  
56  
57  
58  
59  
60

1  
2  
3 A sensitivity analysis was performed excluding life satisfaction from the model, since the  
4 direction of causality could be debatable. Finally, in order to examine trends in individual  
5 countries and explore differences in citizens' perceptions across the various countries, logistic  
6 regressions were conducted including the 'year' variable and individual-level variables for each  
7 EU member state separately.  
8  
9  
10  
11  
12  
13  
14  
15  
16  
17  
18  
19  
20  
21  
22  
23  
24  
25  
26  
27  
28  
29  
30  
31  
32  
33  
34  
35  
36  
37  
38  
39  
40  
41  
42  
43  
44  
45  
46  
47  
48  
49  
50  
51  
52  
53  
54  
55  
56  
57  
58  
59  
60

For peer review only



## Results

A complete description of survey respondents' socio-demographic characteristics for the corresponding years can be found in Supplementary Table 1. European citizens tend to have a positive perception of their healthcare system, which can be seen in the descriptive statistics presented in Table 1. In 2009, 64.9% of respondents, across the EU, stated that healthcare provision in their country was either 'Very good' or 'Rather good'. This proportion was about the same in 2013, and there appears to be little variation from year to year. The unadjusted relationships between positive perceptions of healthcare provision and socio-demographic characteristics are shown in Table 1, in which the proportion of positive perceptions exceeded 50% in almost all the groups, except for those who stated they were not satisfied with their lives overall. Regarding the national-level variables, there appears to be an increasing trend in the proportion of positive perceptions when moving from the lowest quartile to the highest quartile for GDP per capita, total expenditure on health as % of GDP, and government expenditure on health as % of total expenditure on health.

The number of observations included in the multi-level logistic regression analysis after accounting for missing data was 116,706. Looking at the regression results presented in Table 2, there appears to be significant decrease in positive perceptions. Respondents in 2013 had 15% lower odds (95% CI 10-20%) of having a positive perception of healthcare provision in comparison to respondents in 2009 (p-value <0.001).

With regards to individual-level variables, the unadjusted and adjusted results appear to be compatible. Respondents who had difficulty paying their bills 'sometimes or most of the time' had approximately 20% lower odds (95% CI 16-21%) of reporting that healthcare provision in their country was good when compared to those who 'almost never' had difficulty paying their bills (Table 2). Moreover, self-perceptions of position in society (society level) appear to be

1  
2  
3 positively and significantly related to good perceptions of the healthcare system. Those who  
4 considered themselves to belong to higher ranks in society had 27% higher odds (95% CI 21-  
5 32%) of having good perception than those who placed themselves in a low societal level.  
6  
7 Regarding life satisfaction, individuals who were 'very satisfied' with the life they lead had five  
8 times the odds of having a good perception of healthcare provision, relative to individuals who  
9 were 'not at all satisfied'.  
10  
11

12  
13  
14  
15  
16  
17  
18 GDP per capita and total expenditure on health as a percent of GDP were positively and  
19 significantly associated to good perceptions of healthcare systems. The odds of reporting good  
20 perceptions of the healthcare system increased by 8% (95% CI 7-9%) for every \$1,000 increase  
21 in GDP per capita. A positive association was also evident between total expenditure on health  
22 and healthcare perceptions, in which a 1% increase in total expenditure on health as a percent  
23 of GDP increased the odds that citizens would have a good perception of their healthcare  
24 system by 17% (95% CI 11-24%).  
25  
26  
27  
28  
29  
30  
31  
32  
33  
34  
35  
36

### 37 *Country Specific Results*

38  
39 The proportion of individuals who reported positive perceptions of their country's healthcare  
40 system varied between countries. The unadjusted proportions for each of the countries between  
41 2009 and 2013 can be found in Supplementary Table 4. Overall, data from Belgium, the  
42 Netherlands, Luxembourg, and Austria revealed the highest proportions of positive perceptions.  
43  
44 At the other end of the spectrum were Greece, Bulgaria, and Romania which had the lowest  
45 proportion of respondents reporting positive perceptions (below 30%). Figure 1 illustrates the  
46 change in perceptions across countries over the years, specifically comparing the percent of  
47 respondents with good perceptions of the healthcare system in 2009 and 2013. In examining  
48  
49  
50  
51  
52  
53  
54  
55  
56  
57  
58  
59  
60

1  
2  
3 the results, it is evident that Greece and Spain experienced the greatest drop in positive  
4  
5 perceptions between 2009 and 2013.  
6  
7

8  
9 The results of the regression analyses for both Greece and Spain show that respondents in  
10  
11 2013 had 61% (95% CI 50-70%) and 65% (95% CI 56-72%) lower odds of reporting positive  
12  
13 perceptions than respondents in 2009. In total, in seven member states the odds of positive  
14  
15 perceptions were significantly lower in 2013 compared to 2009; odds of positive perceptions  
16  
17 were higher in 2013 than in 2009 in twelve member states (Figure 2).  
18  
19

20  
21  
22 In the sensitivity analysis, excluding 'life satisfaction' from the model appeared to have the  
23  
24 greatest impact on the association between education and perceptions, as well as employment  
25  
26 status and perceptions. Individuals who completed full-time education at the age of twenty-three  
27  
28 years or older had 12% (95% CI 6-18%) higher odds of reporting good perceptions of  
29  
30 healthcare provision in their country compared to individuals who were fifteen years and below  
31  
32 when they exited full time education or those who had no full-time education. Furthermore, the  
33  
34 direction of the association between employment status and perceptions was reversed in the  
35  
36 sensitivity analysis. The key findings from the regression analysis however were fairly similar to  
37  
38 those in the sensitivity analysis.  
39  
40  
41  
42  
43  
44  
45  
46  
47  
48  
49  
50  
51  
52  
53  
54  
55  
56  
57  
58  
59  
60

## Discussion

### *Main Findings*

We found that there was a reduction in positive perceptions of healthcare systems over the years following the financial crisis in Europe. Our analysis also showed that higher national income per capita and higher spending on health were associated with better perceptions throughout the financial crisis. In addition, we observed starkly different trends among member states over the years following the financial crisis, with those hit the hardest by the financial crisis reporting the greatest declines in positive perceptions.

Our finding that the biggest drop in perceptions has occurred in Spain and Greece is in line with evidence from other studies regarding negative health effects documented so far in these countries.[1 4 5] Conversely, countries such as Germany and Denmark, which have either opted to invest in further social protection or decided to protect public spending on health appear to have seen an improvement in the public's perception of the healthcare systems, although we did not formally test whether national policies were associated with changes in perceptions.

These changes in perceptions may not be entirely informed by people's first-hand experiences of the changes precipitated by the policy choices on the healthcare systems, but may be reflective of the general mood precipitated nationally by these policies, essentially highlighting the role of factors 'external' to the health systems. These external factors include the nature of the political debates around the crisis and proposed policy measures, media representation of the changes, and shifts in the general outlook regarding the overall state-of-affairs in the countries.[6 9] Indeed, perceptions of public expenditure retrenchment can have a major influence on public perception. Wendt et al.[18] found public expenditure on health to be a significant determinant of perceptions, irrespective of whether there was a corresponding increase in other sources of finance, such as the private sector. In addition, total health

1  
2  
3 expenditure has been found to be associated with perceptions of safety in healthcare, which  
4  
5 arguably impacts overall perceptions of the health system.[19]  
6  
7  
8

9  
10 The socio-demographic variables also revealed the importance of factors external to the health  
11 system in influencing people's perception. Positive perceptions were more frequent among  
12 people with no financial difficulties and those who regarded themselves as having high status in  
13 society. Bleich et al.[9] report similar findings and we share their explanation that this is possibly  
14 the result of people drawing on their general outlooks and their prospects in life as they  
15 participate in these surveys. To add further credence to this argument, the strongest association  
16 in our study was found between perceptions of health systems and people's self-reported levels  
17 of satisfaction with life in general. This association between overall outlook on life in general and  
18 perceptions of the state of the health care system has long been recognized. [15] Across the  
19 EU, individuals who were older and had lower social status were also found to be more satisfied  
20 with the health system, findings which have been reported previously with regards to both  
21 patient satisfaction and overall perception of the health system. [20-22] These associations may  
22 be explained by different notions of what qualifies as a good healthcare system among different  
23 population groups. [20] For example, younger and highly educated individuals may expect more  
24 out of their healthcare system leading to lower satisfaction if those expectations are not met.  
25  
26  
27  
28  
29  
30  
31  
32  
33  
34  
35  
36  
37  
38  
39  
40  
41  
42  
43

44 The decline in positive perceptions of healthcare services identified in our regression analysis is  
45 not reflected in the unadjusted estimates, which seem to be fairly stable over time across the  
46 EU. Consistent with previous research, [9] we found that perceptions of healthcare systems  
47 were positively associated with GDP per capita. Almost all member states experienced an  
48 increase in GDP between 2009 and 2013, which may explain the discrepancy between  
49 unadjusted and adjusted results.  
50  
51  
52  
53  
54  
55  
56  
57  
58  
59  
60

### *Strengths and Limitations*

We analysed a multiyear dataset covering 27 EU member states to assess trends in public perceptions of national health systems in the aftermath of the financial crisis of 2008. The study used a large sample size coming from a far larger number of countries than similar studies in the past, which had enrolled utmost 21 countries. This has enabled us to study a wide range of countries, which had contrasting experiences and policy responses to the crisis. The cross-sectional nature of the study limits the potential to make causal associations between the crisis and changes in the perceptions; still, the samples were nationally representative, thereby making comparisons meaningful.

Furthermore, the study is guided by critical understanding of the nature of public perception studies, which stipulate that public perception is at least partly explained by factors external to the health system. Studies have determined that people's direct experiences with the healthcare system merely inform up to 13% of their perceptions of national health systems.[6 9] This has specifically guided the selection of factors chosen to test for associations with people's perceptions of their national health systems as well as in the interpretation of the findings. The Eurobarometer survey used a single question to assess citizens' perceptions, rather than using composite indices to be able to capture the multidimensional nature of 'public perception', more comprehensively.[23] Interpreting single item measures may be quite difficult, given that the dimensions of healthcare provision cannot be fully captured in one question.[23] In this study for instance, respondents may have a different understanding of what qualifies as 'very good' healthcare provision. It is also important to note that we could not compare our findings with trends in views about other services that may have also changed during the study period; hence, we were unable to distinguish trends in views about the healthcare system from overall trends about society.

1  
2  
3  
4  
5  
6  
7  
8  
9  
10  
11  
12  
13  
14  
15  
16  
17  
18  
19  
20  
21  
22  
23  
24  
25  
26  
27  
28  
29  
30  
31  
32  
33  
34  
35  
36  
37  
38  
39  
40  
41  
42  
43  
44  
45  
46  
47  
48  
49  
50  
51  
52  
53  
54  
55  
56  
57  
58  
59  
60

Another limitation of the study was the exclusion of Lithuania from the analysis, due to a lack of sufficient data regarding its national-level indicators. Additionally, 10.1% of all observations had missing values for some of the variables and could not be included in the regression analysis. Chi-square tests were conducted, which revealed significant differences with respect to socio-demographic characteristics between those who were included and those who were excluded from the analysis, which introduces into the study a potential bias due to missing data. This may have affected the associations observed between healthcare perceptions and the individual-level variables analyzed in the study.

### *Policy Implications and Conclusions*

Public perceptions of health systems are considered critical for assessment and comparison of national health systems. Our findings suggest that people's perceptions of their countries' health systems are intertwined with their assessment of their overall wellbeing and prospects more generally. This strongly indicates that perception of health systems cannot be viewed in separation to the overall social and economic outlooks of countries. Countries aiming to improve the public's confidence in their health systems need to frame and propagate policy measures as part of a holistic effort aimed at improving social protection and welfare. Finally, we join previous papers[6 9] in calling for studies exploring the ways in which the factors 'external' to health systems shape the public's perception of health systems.

### **Data sharing statement**

The datasets are publicly available at the GESIS Data Archive at [www.gesis.org](http://www.gesis.org).

1  
2  
3 **Authors' contribution**  
4

5 FTF conceived the study and AMA conducted the data analysis. AMA, FTF and HBT  
6  
7 contributed to data interpretation and manuscript preparation.  
8  
9

10  
11 **Acknowledgements**  
12

13  
14 None.  
15  
16  
17  
18  
19  
20  
21  
22  
23  
24  
25  
26  
27  
28  
29  
30  
31  
32  
33  
34  
35  
36  
37  
38  
39  
40  
41  
42  
43  
44  
45  
46  
47  
48  
49  
50  
51  
52  
53  
54  
55  
56  
57  
58  
59  
60

For peer review only



## References

1. Karanikolos M, Mladovsky P, Cylus J, et al. Financial crisis, austerity, and health in Europe. *Lancet* 2013;**381**(9874):1323-31 doi: 10.1016/S0140-6736(13)60102-6[published Online First: Epub Date]].
2. McKee M, Karanikolos M, Belcher P, et al. Austerity: a failed experiment on the people of Europe. *Clin Med (Lond)* 2012;**12**(4):346-50
3. Palladino R, Lee JT, Hone T, et al. The Great Recession And Increased Cost Sharing In European Health Systems. *Health Aff (Millwood)* 2016;**35**(7):1204-13 doi: 10.1377/hlthaff.2015.1170[published Online First: Epub Date]].
4. Simou E, Koutsogeorgou E. Effects of the economic crisis on health and healthcare in Greece in the literature from 2009 to 2013: a systematic review. *Health Policy* 2014;**115**(2-3):111-9 doi: 10.1016/j.healthpol.2014.02.002[published Online First: Epub Date]].
5. Parmar D, Stavropoulou C, Ioannidis JP. Health outcomes during the 2008 financial crisis in Europe: systematic literature review. *BMJ* 2016;**354**:i4588 doi: 10.1136/bmj.i4588[published Online First: Epub Date]].
6. Papanicolas I, Cylus J, Smith PC. An analysis of survey data from eleven countries finds that 'satisfaction' with health system performance means many things. *Health Aff (Millwood)* 2013;**32**(4):734-42 doi: 10.1377/hlthaff.2012.1338[published Online First: Epub Date]].
7. Hero JO, Blendon RJ, Zaslavsky AM, et al. Understanding What Makes Americans Dissatisfied With Their Health Care System: An International Comparison. *Health Aff (Millwood)* 2016;**35**(3):502-9 doi: 10.1377/hlthaff.2015.0978[published Online First: Epub Date]].
8. Blendon RJ, Kim M, Benson JM. The public versus the World Health Organization on health system performance. *Health Aff (Millwood)* 2001;**20**(3):10-20

- 1  
2  
3 9. Bleich SN, Ozaltin E, Murray CK. How does satisfaction with the health-care system relate to  
4  
5 patient experience? Bull World Health Organ 2009;**87**(4):271-8  
6
- 7  
8 10. Grosso AL, Van Ryzin GG. Public management reform and citizen perceptions of the UK  
9  
10 health system. International review of administrative sciences 2012;**78**(3):494-513 doi:  
11  
12 10.1177/0020852312442658[published Online First: Epub Date]].  
13
- 14 11. Kikuzawa S, Olafsdottir S, Pescosolido BA. Similar pressures, different contexts: public  
15  
16 attitudes toward government intervention for health care in 21 nations. J Health Soc  
17  
18 Behav 2008;**49**(4):385-99 doi: 10.1177/002214650804900402[published Online First:  
19  
20 Epub Date]].  
21
- 22 12. European Commission. Special Eurobarometer 429. Attitudes of Europeans towards  
23  
24 tobacco, 2015.  
25
- 26 13. gesis. Eurobarometer Data Service Sampling and Fieldwork Secondary Eurobarometer  
27  
28 Data Service Sampling and Fieldwork 2016. [http://www.gesis.org/eurobarometer-data-](http://www.gesis.org/eurobarometer-data-service/survey-series/standard-special-eb/sampling-and-fieldwork/)  
29  
30 [service/survey-series/standard-special-eb/sampling-and-fieldwork/](http://www.gesis.org/eurobarometer-data-service/survey-series/standard-special-eb/sampling-and-fieldwork/)  
31  
32
- 33 14. gesis. Eurobarometer Data Service Weighting Overview. Secondary Eurobarometer Data  
34  
35 Service Weighting Overview 2016. [http://www.gesis.org/eurobarometer-data-](http://www.gesis.org/eurobarometer-data-service/survey-series/standard-special-eb/weighting-overview/)  
36  
37 [service/survey-series/standard-special-eb/weighting-overview/](http://www.gesis.org/eurobarometer-data-service/survey-series/standard-special-eb/weighting-overview/).  
38  
39
- 40 15. Cleary PD, McNeil BJ. Patient satisfaction as an indicator of quality care. Inquiry  
41  
42 1988;**25**(1):25-36  
43
- 44 16. The World Bank. International Comparison Program database. Secondary International  
45  
46 Comparison Program database 2016.  
47  
48 <http://data.worldbank.org/indicator/NY.GDP.PCAP.PP.CD?view=chart>  
49  
50
- 51 17. WHO. Global Health Observatory Data. Secondary Global Health Observatory Data 2016.  
52  
53 <http://www.who.int/gho/countries/en/>  
54
- 55 18. Wendt C, Kohl J, Mischke M, et al. How do Europeans perceive their healthcare system?  
56  
57 Patterns of satisfaction and preference for state involvement in the field of healthcare.  
58  
59

1  
2  
3 European Sociological Review 2009;**26**(2):177-92 doi: 10.1093/esr/jcp014[published  
4  
5 Online First: Epub Date]].

- 6  
7  
8 19. Filippidis FT, Mian SS, Millett C. Perceptions of quality and safety and experience of  
9  
10 adverse events in 27 European Union healthcare systems, 2009-2013. Int J Qual Health  
11  
12 Care 2016 doi: 10.1093/intqhc/mzw097[published Online First: Epub Date]].
- 13  
14 20. Young GJ, Meterko M, Desai KR. Patient satisfaction with hospital care: effects of  
15  
16 demographic and institutional characteristics. Medical care 2000;**38**(3):325-34  
17  
18  
19 21. Sofaer S, Firminger K. Patient perceptions of the quality of health services. Annual review of  
20  
21 public health 2005;**26**:513-59 doi:  
22  
23 10.1146/annurev.publhealth.25.050503.153958[published Online First: Epub Date]].
- 24  
25 22. Jackson JL, Chamberlin J, Kroenke K. Predictors of patient satisfaction. Social science &  
26  
27 medicine 2001;**52**(4):609-20  
28
- 29 23. Hudak PL, Wright JG. The characteristics of patient satisfaction measures. Spine (Phila Pa  
30  
31 1976) 2000;**25**(24):3167-77.  
32  
33  
34  
35  
36  
37  
38  
39  
40  
41  
42  
43  
44  
45  
46  
47  
48  
49  
50  
51  
52  
53  
54  
55  
56  
57  
58  
59  
60

Table 1. Descriptive statistics of positive perceptions of healthcare provision among EU citizens between 2009 and 2013

| Variable                                     | % of respondents with positive perceptions of healthcare provision | 95% Confidence Interval |
|----------------------------------------------|--------------------------------------------------------------------|-------------------------|
| <b>Year</b>                                  |                                                                    |                         |
| 2009                                         | 64.9                                                               | 64.0-65.8               |
| 2010                                         | 64.9                                                               | 64.0-65.8               |
| 2011                                         | 62.9                                                               | 62.0-63.8               |
| 2012                                         | 63.3                                                               | 62.4-64.2               |
| 2013                                         | 64.0                                                               | 63.1-64.9               |
| <b>Gender</b>                                |                                                                    |                         |
| Male                                         | 65.3                                                               | 64.7-65.8               |
| Female                                       | 62.8                                                               | 62.3-63.3               |
| <b>Age</b>                                   |                                                                    |                         |
| 75 years and older                           | 70.1                                                               | 68.8-71.4               |
| 65-74 years                                  | 64.5                                                               | 63.4-65.6               |
| 55-64 years                                  | 61.9                                                               | 60.9-62.8               |
| 45-54 years                                  | 62.2                                                               | 61.2-63.4               |
| 35-44 years                                  | 61.6                                                               | 60.7-62.6               |
| 25-34 years                                  | 62.6                                                               | 61.6-63.6               |
| 15-24 years                                  | 68.9                                                               | 67.8-70.0               |
| <b>Marital Status</b>                        |                                                                    |                         |
| Single                                       | 68.1                                                               | 67.2-68.9               |
| Married or Living with a partner             | 62.9                                                               | 62.3-63.4               |
| Separated/<br>Divorced/Widowed               | 62.3                                                               | 61.4-63.3               |
| <b>Area of Residence</b>                     |                                                                    |                         |
| Rural area or village                        | 63.8                                                               | 63.1-64.4               |
| Small/Middle town                            | 65.3                                                               | 64.6-65.9               |
| Large town                                   | 62.1                                                               | 61.4-62.9               |
| <b>Employment Status</b>                     |                                                                    |                         |
| Unemployed                                   | 57.3                                                               | 55.9-58.7               |
| Not working                                  | 64.8                                                               | 64.2-65.4               |
| Employed                                     | 64.5                                                               | 63.9-65.0               |
| <b>Society Level</b>                         |                                                                    |                         |
| Low                                          | 53.6                                                               | 52.7-54.4               |
| Middle                                       | 65.1                                                               | 64.5-65.7               |
| High                                         | 71.2                                                               | 70.4-71.9               |
| <b>Difficulty Paying Bills</b>               |                                                                    |                         |
| Almost Never                                 | 70.8                                                               | 70.3-71.3               |
| Sometimes or Most of the time                | 53.4                                                               | 52.7-54.0               |
| <b>Education</b>                             |                                                                    |                         |
| 15 years and below or No full time education | 61.6                                                               | 60.7-62.5               |
| 16-19 years                                  | 62.6                                                               | 62.0-63.2               |

|                                                                                     |             |                  |
|-------------------------------------------------------------------------------------|-------------|------------------|
| <b>20-22 years</b>                                                                  | 68.4        | 67.3-69.4        |
| <b>23 years and older</b>                                                           | 68.4        | 67.4-69.3        |
| <b>Life Satisfaction</b>                                                            |             |                  |
| <b>Not at all satisfied</b>                                                         | 26.5        | 24.9-28.1        |
| <b>Not very satisfied</b>                                                           | 39.1        | 38.1-40.1        |
| <b>Fairly satisfied</b>                                                             | 67.4        | 66.9-67.9        |
| <b>Very satisfied</b>                                                               | 82.5        | 81.8-83.2        |
| <b>GDP per capita<br/>(PPP current intl. \$)</b>                                    |             |                  |
| <b>Lower quartile</b>                                                               | 30.0        | 29.3-30.7        |
| <b>2<sup>nd</sup> quartile</b>                                                      | 60.3        | 59.5-61.1        |
| <b>3<sup>rd</sup> quartile</b>                                                      | 71.6        | 71.0-72.3        |
| <b>Upper quartile</b>                                                               | 80.4        | 79.6-81.2        |
| <b>Total expenditure on health<br/>as % of GDP</b>                                  |             |                  |
| <b>Lower quartile</b>                                                               | 32.8        | 32.0-33.6        |
| <b>2<sup>nd</sup> quartile</b>                                                      | 58.8        | 57.8-59.7        |
| <b>3<sup>rd</sup> quartile</b>                                                      | 69.1        | 68.3-69.8        |
| <b>Upper quartile</b>                                                               | 77.5        | 76.9-78.1        |
| <b>Government expenditure on<br/>health as % of total<br/>expenditure on health</b> |             |                  |
| <b>Lower quartile</b>                                                               | 34.4        | 33.8-35.1        |
| <b>2<sup>nd</sup> quartile</b>                                                      | 57.2        | 56.4-58.0        |
| <b>3<sup>rd</sup> quartile</b>                                                      | 67.3        | 66.6-68.0        |
| <b>Upper quartile</b>                                                               | 76.0        | 75.2-76.7        |
| <b>Overall</b>                                                                      | <b>64.0</b> | <b>63.6-64.4</b> |

Notes: Weighted percentages were included in the table; all values were rounded to the first decimal place.

Table 2. Results of multi-level logistic regression illustrating adjusted trends and associations of positive perceptions of healthcare provision among EU citizens between 2009 and 2013

| Variable                                             | Odds Ratio | P-value | 95% Confidence Interval |
|------------------------------------------------------|------------|---------|-------------------------|
| <b>Year</b>                                          |            |         |                         |
| <b>2009*</b>                                         |            |         |                         |
| <b>2010</b>                                          | 0.98       | 0.510   | 0.94-1.03               |
| <b>2011</b>                                          | 0.79       | <0.001  | 0.75-0.84               |
| <b>2012</b>                                          | 0.85       | <0.001  | 0.80-0.90               |
| <b>2013</b>                                          | 0.85       | <0.001  | 0.80-0.90               |
| <b>Gender</b>                                        |            |         |                         |
| <b>Male*</b>                                         |            |         |                         |
| <b>Female</b>                                        | 0.89       | <0.001  | 0.87-0.92               |
| <b>Age</b>                                           |            |         |                         |
| <b>75 years and older*</b>                           |            |         |                         |
| <b>65-74 years</b>                                   | 0.82       | <0.001  | 0.77-0.88               |
| <b>55-64 years</b>                                   | 0.75       | <0.001  | 0.70-0.80               |
| <b>45-54 years</b>                                   | 0.75       | <0.001  | 0.70-0.80               |
| <b>35-44 years</b>                                   | 0.77       | <0.001  | 0.71-0.82               |
| <b>25-34 years</b>                                   | 0.80       | <0.001  | 0.74-0.86               |
| <b>15-24 years</b>                                   | 0.90       | 0.010   | 0.83-0.98               |
| <b>Marital Status</b>                                |            |         |                         |
| <b>Single*</b>                                       |            |         |                         |
| <b>Married or Living with a partner</b>              | 0.93       | 0.001   | 0.89-0.97               |
| <b>Separated/ Divorced/Widowed</b>                   | 0.97       | 0.266   | 0.92-1.02               |
| <b>Area of Residence</b>                             |            |         |                         |
| <b>Rural area or village*</b>                        |            |         |                         |
| <b>Small/Middle town</b>                             | 1.03       | 0.069   | 1.00-1.07               |
| <b>Large town</b>                                    | 1.01       | 0.552   | 0.97-1.05               |
| <b>Employment Status</b>                             |            |         |                         |
| <b>Unemployed*</b>                                   |            |         |                         |
| <b>Not working</b>                                   | 0.98       | 0.551   | 0.93-1.04               |
| <b>Employed</b>                                      | 0.91       | 0.001   | 0.87-0.96               |
| <b>Society Level</b>                                 |            |         |                         |
| <b>Low*</b>                                          |            |         |                         |
| <b>Middle</b>                                        | 1.12       | <0.001  | 1.08-1.16               |
| <b>High</b>                                          | 1.27       | <0.001  | 1.21-1.32               |
| <b>Difficulty Paying Bills</b>                       |            |         |                         |
| <b>Almost never*</b>                                 |            |         |                         |
| <b>Sometimes or Most of the time</b>                 | 0.81       | <0.001  | 0.79-0.84               |
| <b>Education</b>                                     |            |         |                         |
| <b>15 years and below or no full time education*</b> |            |         |                         |
| <b>16-19 years</b>                                   | 0.97       | 0.098   | 0.93-1.01               |
| <b>20-22 years</b>                                   | 1.02       | 0.494   | 0.97-1.08               |
| <b>23 years and older</b>                            | 1.03       | 0.219   | 0.98-1.09               |

|                                                                             |      |        |           |
|-----------------------------------------------------------------------------|------|--------|-----------|
| <b>Life Satisfaction</b>                                                    |      |        |           |
| <b>Not at all satisfied*</b>                                                |      |        |           |
| <b>Not very satisfied</b>                                                   | 1.63 | <0.001 | 1.52-1.75 |
| <b>Fairly satisfied</b>                                                     | 3.56 | <0.001 | 3.33-3.82 |
| <b>Very satisfied</b>                                                       | 5.65 | <0.001 | 5.23-6.10 |
| <b>GDP per capita</b>                                                       | 1.08 | <0.001 | 1.07-1.09 |
| <b>Total expenditure on health as % of GDP</b>                              | 1.17 | <0.001 | 1.11-1.24 |
| <b>Government expenditure on health as % of total expenditure on health</b> | 1.02 | 0.684  | 0.91-1.15 |

\* Reference category

Notes: Odds Ratios (OR) and 95% CI rounded to two decimal places; OR for GDP per capita refers to a \$1000 increase; OR for total expenditure on health as % of GDP refers to a 1% increase; OR for government expenditure on health as % of total expenditure on health refers to a 10% increase.

1  
2  
3  
4  
5  
6  
7  
8  
9  
10  
11  
12  
13  
14  
15  
16  
17  
18  
19  
20  
21  
22  
23  
24  
25  
26  
27  
28  
29  
30  
31  
32  
33  
34  
35  
36  
37  
38  
39  
40  
41  
42  
43  
44  
45  
46  
47  
48  
49  
50  
51  
52  
53  
54  
55  
56  
57  
58  
59  
60

Figure 1. Proportion of respondents with positive perceptions of healthcare provision in 27 EU member-states in 2009 and 2013

For peer review only



1  
2  
3 Figure 2. Adjusted trends (OR and 95% CI) of positive perceptions of healthcare provision for  
4 each of the 27 EU member-states comparing perceptions in 2013 to 2009  
5  
6  
7  
8  
9  
10  
11  
12  
13  
14  
15  
16  
17  
18  
19  
20  
21  
22  
23  
24  
25  
26  
27  
28  
29  
30  
31  
32  
33  
34  
35  
36  
37  
38  
39  
40  
41  
42  
43  
44  
45  
46  
47  
48  
49  
50  
51  
52  
53  
54  
55  
56  
57  
58  
59  
60

For peer review only

1  
2  
3  
4  
5  
6  
7  
8  
9  
10  
11  
12  
13  
14  
15  
16  
17  
18  
19  
20  
21  
22  
23  
24  
25  
26  
27  
28  
29  
30  
31  
32  
33  
34  
35  
36  
37  
38  
39  
40  
41  
42  
43  
44  
45  
46  
47  
48  
49  
50  
51  
52  
53  
54  
55  
56  
57  
58  
59  
60



Figure 1. Proportion of respondents with positive perceptions of healthcare provision in 27 EU member-states in 2009 and 2013

279x139mm (300 x 300 DPI)

review only

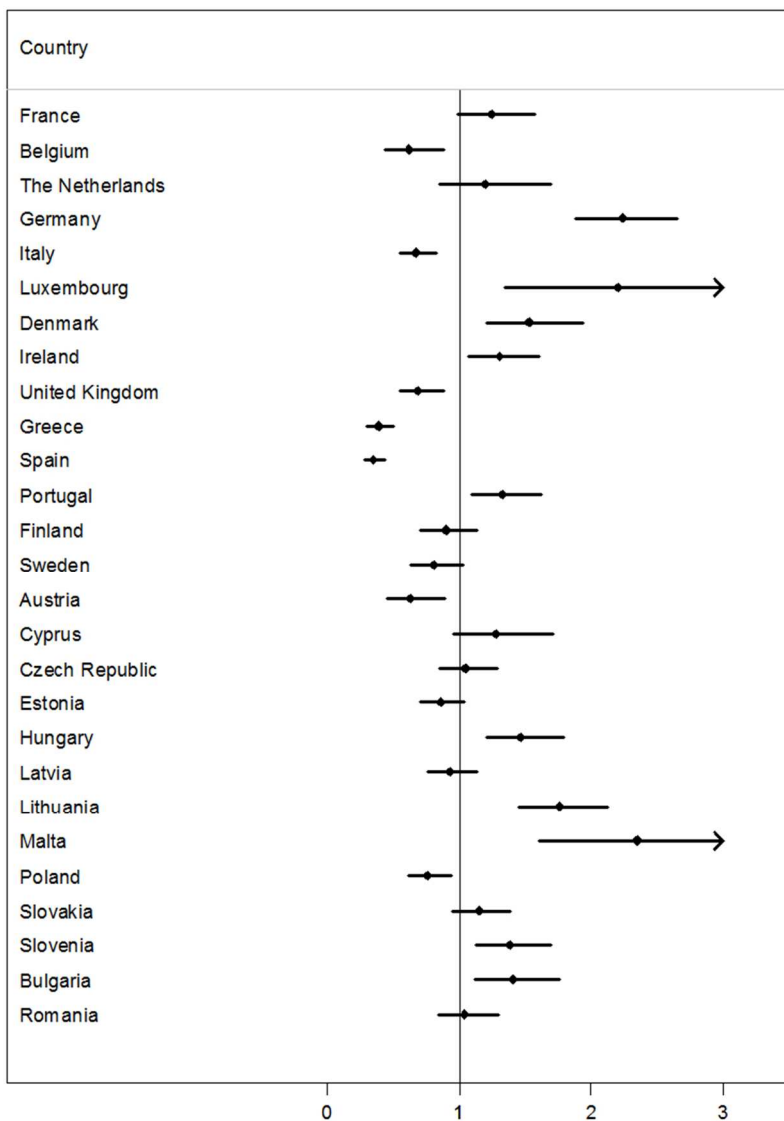

Figure 2. Adjusted trends (OR and 95% CI) of positive perceptions of healthcare provision for each of the 27 EU member-states comparing perceptions in 2013 to 2009

70x94mm (300 x 300 DPI)

Supplementary Table 1. Respondents' socio-demographic characteristics for each survey wave

| Characteristic                                                     | 2009             | 2010             | 2011             | 2012             | 2013             |
|--------------------------------------------------------------------|------------------|------------------|------------------|------------------|------------------|
| <b>Gender</b>                                                      |                  |                  |                  |                  |                  |
| <b>Male (%)</b>                                                    | 48.3 (47.3-49.2) | 48.3 (47.4-49.3) | 48.3 (47.4-49.3) | 48.3 (47.4-49.3) | 48.3 (47.4-49.3) |
| <b>Female (%)</b>                                                  | 51.7 (50.8-52.7) | 51.7 (50.7-52.6) | 51.7 (50.7-52.6) | 51.7 (50.7-52.6) | 51.7 (50.7-52.6) |
| <b>Age in years (mean)</b>                                         | 46.1 (45.8-46.5) | 46.4 (46.0-46.8) | 46.7 (46.3-47.0) | 46.7 (46.4-47.1) | 46.8 (46.5-47.2) |
| <b>Marital Status</b>                                              |                  |                  |                  |                  |                  |
| <b>Single (%)</b>                                                  | 21.8 (21.0-22.6) | 22.3 (21.5-23.1) | 21.6 (20.8-22.4) | 22.1 (21.3-22.9) | 20.4 (19.6-21.2) |
| <b>Married or living with a partner (%)</b>                        | 63.1 (62.2-64.0) | 63.0 (62.1-63.9) | 63.8 (62.9-64.7) | 62.7 (61.8-63.7) | 64.7 (63.8-65.6) |
| <b>Separated/Divorced/Widowed (%)</b>                              | 15.1 (14.4-15.7) | 14.8 (14.1-15.4) | 14.6 (14.0-15.2) | 15.2 (14.6-15.8) | 15.0 (14.4-15.6) |
| <b>Area of Residence</b>                                           |                  |                  |                  |                  |                  |
| <b>Living in rural area or village (%)</b>                         | 34.5 (33.6-35.4) | 34.7 (33.8-35.6) | 33.6 (32.8-34.5) | 32.2 (31.3-33.1) | 32.2 (31.3-33.0) |
| <b>Living in a small/middle town (%)</b>                           | 40.1 (39.2-41.1) | 39.3 (38.4-40.3) | 41.0 (40.1-42.0) | 43.1 (42.1-44.0) | 42.8 (41.9-43.7) |
| <b>Living in a large town (%)</b>                                  | 25.4 (24.6-26.2) | 26.0 (25.2-26.8) | 25.3 (24.6-26.2) | 24.8 (24.0-25.6) | 25.0 (24.3-25.9) |
| <b>Employment Status</b>                                           |                  |                  |                  |                  |                  |
| <b>Unemployed (%)</b>                                              | 8.4 (7.9-9.0)    | 8.2 (7.7-8.7)    | 7.5 (7.0-7.9)    | 9.6 (9.1-10.2)   | 9.8 (9.3-10.4)   |
| <b>Not working (%)</b>                                             | 41.6 (40.7-42.6) | 43.5 (42.6-44.5) | 43.5 (42.5-44.4) | 41.4 (40.5-42.3) | 41.3 (40.4-42.2) |
| <b>Employed (%)</b>                                                | 49.9 (49.0-50.9) | 48.3 (47.4-49.2) | 49.1 (48.1-50.0) | 49.0 (48.0-49.9) | 48.9 (47.9-49.8) |
| <b>Society Level</b>                                               |                  |                  |                  |                  |                  |
| <b>Low (%)</b>                                                     | 23.8 (23.0-24.6) | 22.2 (21.4-23.0) | 20.8 (20.0-21.5) | 23.1 (22.3-23.9) | 23.8 (23.0-24.6) |
| <b>Middle (%)</b>                                                  | 52.3 (51.4-53.3) | 51.3 (50.3-52.2) | 52.1 (51.2-53.1) | 52.4 (51.4-53.4) | 51.8 (50.8-52.7) |
| <b>High (%)</b>                                                    | 23.9 (23.1-24.7) | 26.5 (25.7-27.4) | 27.1 (26.3-27.9) | 24.5 (23.7-25.3) | 24.4 (23.6-25.3) |
| <b>Financial Situation</b>                                         |                  |                  |                  |                  |                  |
| <b>Difficulty paying bills 'almost never' (%)</b>                  | 60.7 (60.0-61.6) | 61.2 (60.3-62.1) | 62.3 (61.4-63.2) | 59.8 (58.8-60.7) | 60.8 (60.0-61.7) |
| <b>Difficulty paying bills 'sometimes or most of the time' (%)</b> | 39.3 (38.4-40.2) | 38.9 (37.9-39.7) | 37.7 (36.8-38.6) | 40.2 (39.3-41.2) | 39.2 (38.3-40.1) |
| <b>Education</b>                                                   |                  |                  |                  |                  |                  |

|                                                                                |                  |                  |                  |                  |                  |
|--------------------------------------------------------------------------------|------------------|------------------|------------------|------------------|------------------|
| <b>Completed education at 15 years and below or no full time education (%)</b> | 24.2 (23.3-25.0) | 23.8 (22.9-24.6) | 24.6 (23.8-25.4) | 22.7 (21.9-23.5) | 20.4 (19.7-21.2) |
| <b>Completed education at 16-19 years of age (%)</b>                           | 47.1 (46.2-48.0) | 47.3 (46.3-48.2) | 46.4 (45.5-47.4) | 47.0 (46.1-48.0) | 48.2 (47.3-49.1) |
| <b>Completed education at 20-22 years of age (%)</b>                           | 14.0 (13.4-14.7) | 13.9 (13.3-14.6) | 13.5 (12.9-14.2) | 14.2 (13.6-14.9) | 14.9 (14.2-15.6) |
| <b>Completed education at 23 years or older (%)</b>                            | 14.7 (14.1-15.4) | 15.1 (14.4-15.7) | 15.4 (14.8-16.1) | 16.1 (15.4-16.8) | 16.5 (15.8-17.2) |
| <b>Life Satisfaction</b>                                                       |                  |                  |                  |                  |                  |
| <b>Not at all satisfied with the life they lead (%)</b>                        | 4.3 (3.9-4.6)    | 5.1 (4.8-5.5)    | 4.4 (4.1-4.7)    | 5.2 (4.8-5.6)    | 5.7 (5.3-6.1)    |
| <b>Not very satisfied with the life they lead (%)</b>                          | 15.8 (15.2-16.5) | 15.4 (14.8-16.1) | 14.0 (13.4-14.7) | 18.4 (17.7-19.1) | 17.1 (16.4-17.8) |
| <b>Fairly satisfied with the life they lead (%)</b>                            | 57.8 (56.9-58.7) | 57.8 (56.9-58.8) | 56.8 (55.9-57.7) | 56.8 (55.8-57.7) | 55.4 (54.5-56.3) |
| <b>Very satisfied with the life they lead (%)</b>                              | 22.1 (21.3-22.9) | 21.6 (20.8-22.4) | 24.8 (24.0-25.6) | 19.6 (18.9-20.4) | 21.8 (21.0-22.6) |

Notes: Weighted percentages were included in the table; all values were rounded to first decimal place; numbers may not add up exactly to 100% due to rounding errors; values in parentheses indicate 95% Confidence Intervals (CI).

Supplementary Table 2. GDP per capita of 27 EU member states between 2009 and 2013

| Country        | 2009    | 2010    | 2011    | 2012    | 2013    |
|----------------|---------|---------|---------|---------|---------|
| France         | 34797.5 | 35891.3 | 37325.3 | 37473.6 | 39209.6 |
| Belgium        | 37629.4 | 39257.8 | 40858.7 | 41927.6 | 43059.8 |
| Netherlands    | 44386.5 | 44773.9 | 46388.3 | 46448.9 | 47954.5 |
| Germany        | 37112.9 | 39639.5 | 42142.5 | 43600.1 | 44184.8 |
| Italy          | 34159.2 | 34740.1 | 35901.3 | 35931.1 | 35761.6 |
| Luxembourg     | 80306.1 | 84589.8 | 91073.3 | 90788.3 | 95928.6 |
| Denmark        | 39612.1 | 41835.8 | 43314.1 | 43873.9 | 45270.1 |
| Ireland        | 41866.5 | 43249.6 | 45673.5 | 46063.3 | 47599.7 |
| United Kingdom | 36361.9 | 35879.8 | 36590.2 | 37569.3 | 39111.2 |
| Greece         | 30652.2 | 28981.4 | 26626.5 | 25980.1 | 26753.1 |
| Spain          | 32796.7 | 32372.9 | 32530.1 | 32235.6 | 32842.4 |
| Portugal       | 26208.9 | 26943   | 26932.4 | 27125.2 | 27929.9 |
| Finland        | 37534.5 | 38322.9 | 40251.4 | 40437.6 | 40831.7 |
| Sweden         | 39657.2 | 41756   | 43709.2 | 44433.7 | 45067.4 |
| Austria        | 40620.4 | 41892.8 | 44022.4 | 45858.2 | 47416.3 |
| Cyprus         | 34087.7 | 33957.9 | 32983   | 31920.4 | 30587.4 |
| Czech Republic | 27008.8 | 27069.6 | 28604.2 | 28727.9 | 30043.6 |
| Estonia        | 20206.2 | 21113.1 | 23954.9 | 25921   | 27169.3 |
| Hungary        | 20860.6 | 21576.7 | 22603.2 | 22701.5 | 24037.2 |
| Latvia         | 17032.9 | 17409.9 | 19450.9 | 21122.3 | 22559   |
| Lithuania      | 18277.9 | 20085.1 | 22541.6 | 24475.1 | 26511.1 |
| Malta          | 25828.6 | 26690   | 28177.5 | 28355.7 | 29525.6 |
| Poland         | 19139.5 | 20883.1 | 22520   | 23598.6 | 24493.8 |
| Slovakia       | 23172.3 | 24515.7 | 25167.5 | 26091.3 | 27414.2 |
| Slovenia       | 27506.3 | 27607.7 | 28513.5 | 28481.7 | 29097.6 |
| Bulgaria       | 14870.8 | 15084.3 | 15603   | 16097.8 | 16573.5 |
| Romania        | 15815.2 | 16579.8 | 17624.5 | 18952   | 19576.6 |

\*Notes: GDP per capita, PPP (current international \$)

Supplementary Table 3. Total expenditure on health as a percentage of GDP for 27 EU member states between 2009 and 2013

| Country        | 2009 | 2010 | 2011 | 2012 | 2013 |
|----------------|------|------|------|------|------|
| France         | 11.6 | 11.6 | 11.5 | 11.6 | 11.7 |
| Belgium        | 10.7 | 10.6 | 10.6 | 10.9 | 11.2 |
| Netherlands    | 11.9 | 12.1 | 12.1 | 12.7 | 12.9 |
| Germany        | 11.8 | 11.7 | 11.2 | 11.3 | 11.3 |
| Italy          | 9.4  | 9.4  | 9.2  | 9.2  | 9.1  |
| Luxembourg     | 8.1  | 7.7  | 7.4  | 7.2  | 7.1  |
| Denmark        | 11.5 | 11.1 | 10.9 | 11   | 10.6 |
| Ireland        | 9.9  | 9.2  | 8.7  | 8.9  | 8.9  |
| United Kingdom | 9.7  | 9.4  | 9.2  | 9.3  | 9.1  |
| Greece         | 10.2 | 9.5  | 9.8  | 9.3  | 9.8  |
| Spain          | 9.6  | 9.6  | 9.4  | 9.3  | 8.9  |
| Portugal       | 10.8 | 10.9 | 10.4 | 9.9  | 9.7  |
| Finland        | 9.2  | 9    | 8.9  | 9.1  | 9.4  |
| Sweden         | 9.9  | 9.5  | 9.5  | 9.6  | 9.7  |
| Austria        | 11.2 | 11.1 | 10.9 | 11.1 | 11   |
| Cyprus         | 7.4  | 7.3  | 7.6  | 7.4  | 7.4  |
| Czech Republic | 7.8  | 7.4  | 7.5  | 7.5  | 7.2  |
| Estonia        | 6.9  | 6.2  | 5.8  | 5.9  | 5.7  |
| Hungary        | 7.7  | 8.1  | 8    | 8    | 8    |
| Latvia         | 6.8  | 6.6  | 6.1  | 5.9  | 5.7  |
| Lithuania      | N/A  | N/A  | N/A  | N/A  | N/A  |
| Malta          | 8.3  | 8.3  | 9.5  | 8.7  | 8.7  |
| Poland         | 7.2  | 7    | 6.9  | 6.8  | 6.7  |
| Slovakia       | 9.2  | 8.5  | 8    | 8.1  | 8.2  |
| Slovenia       | 9.4  | 9.1  | 9.1  | 9.4  | 9.2  |
| Bulgaria       | 7.2  | 7.6  | 7.4  | 7.4  | 7.6  |
| Romania        | 5.6  | 5.9  | 5.6  | 5.6  | 5.3  |

Supplementary Table 4. Proportion of respondents with good perceptions of healthcare provision by country

| Country        | 2009             | 2010             | 2011             | 2012             | 2013             |
|----------------|------------------|------------------|------------------|------------------|------------------|
| France         | 78.9 (76.2-81.3) | 80.5 (77.9-82.9) | 73.7 (70.8-76.3) | 81.3 (78.7-83.6) | 83.0 (80.5-85.2) |
| Belgium        | 94.0 (92.4-95.4) | 92.8 (91.1-94.3) | 94.7 (93.2-95.9) | 95.6 (94.1-96.7) | 90.2 (88.1-92.0) |
| Netherlands    | 91.3 (89.3-92.9) | 89.7 (87.4-91.6) | 89.4 (87.2-91.3) | 91.6 (89.4-93.3) | 92.7 (90.8-94.3) |
| Germany        | 62.4 (59.6-65.1) | 65.7 (62.9-68.5) | 66.2 (63.4-68.9) | 81.2 (78.8-83.4) | 80.8 (78.5-82.9) |
| Italy          | 55.6 (52.4-58.8) | 53.6 (50.5-56.7) | 56.6 (53.5-59.7) | 41.1 (38.0-44.2) | 44.6 (41.5-47.7) |
| Luxembourg     | 87.7 (84.4-90.3) | 93.9 (91.4-95.7) | 91.8 (89.1-93.9) | 93.7 (90.7-95.8) | 94.1 (91.4-96.0) |
| Denmark        | 77.5 (74.7-80.1) | 76.1 (73.3-78.7) | 74.9 (72.0-77.7) | 83.8 (81.2-86.1) | 83.2 (80.5-85.6) |
| Ireland        | 41.4 (38.3-44.6) | 43.3 (40.1-46.6) | 44.5 (41.3-47.7) | 45.4 (42.2-48.7) | 45.5 (42.3-48.7) |
| United Kingdom | 87.3 (85.0-89.3) | 88.5 (86.3-90.4) | 85.0 (82.7-87.1) | 86.5 (84.1-88.6) | 84.0 (81.6-86.2) |
| Greece         | 29.9 (27.1-32.8) | 23.4 (20.8-26.2) | 22.8 (20.2-25.6) | 9.1 (7.5-11.1)   | 13.0 (11.0-15.3) |
| Spain          | 78.9 (76.3-81.4) | 79.5 (76.8-81.9) | 72.9 (70.0-75.6) | 69.2 (66.2-72.0) | 56.3 (53.2-59.4) |
| Portugal       | 46.5 (43.2-49.7) | 39.1 (36.1-42.3) | 46.4 (43.3-49.4) | 35.8 (32.9-38.9) | 47.8 (44.6-50.9) |
| Finland        | 82.7 (80.1-85.0) | 80.3 (77.6-82.8) | 78.4 (75.5-81.0) | 81.7 (78.9-84.2) | 80.9 (78.0-83.5) |
| Sweden         | 84.1 (81.5-86.4) | 85.5 (82.9-87.7) | 78.2 (75.0-81.0) | 87.3 (84.7-89.5) | 82.0 (78.9-84.7) |
| Austria        | 90.5 (88.3-92.3) | 91.8 (89.9-93.4) | 94.1 (92.4-95.5) | 91.0 (88.9-92.6) | 87.6 (85.4-89.6) |
| Cyprus         | 56.9 (52.1-61.5) | 60.4 (55.9-64.7) | 59.5 (55.0-63.7) | 53.2 (48.8-57.6) | 57.0 (52.6-61.3) |
| Czech Republic | 67.2 (64.0-70.3) | 75.3 (72.5-77.9) | 64.5 (61.4-67.4) | 68.6 (65.6-71.4) | 69.4 (66.4-72.1) |
| Estonia        | 61.0 (57.7-64.1) | 63.5 (60.4-66.5) | 59.8 (56.6-62.9) | 63.1 (59.9-66.1) | 56.4 (53.2-59.7) |
| Hungary        | 34.2 (31.2-37.4) | 36.8 (33.8-40.0) | 33.5 (30.6-36.6) | 32.3 (29.4-35.4) | 43.8 (40.7-47.0) |
| Latvia         | 37.2 (34.0-40.5) | 30.8 (27.9-33.8) | 31.8 (29.0-34.8) | 30.1 (27.3-33.1) | 38.5 (35.3-41.9) |
| Lithuania      | 40.6 (37.5-43.7) | 38.6 (35.6-41.7) | 39.6 (36.6-42.7) | 40.0 (36.9-43.1) | 56.0 (52.9-59.1) |
| Malta          | 75.8 (70.9-80.1) | 81.2 (77.2-84.6) | 82.7 (78.9-85.9) | 82.6 (78.7-86.0) | 88.8 (85.3-91.6) |
| Poland         | 37.4 (34.2-40.7) | 33.2 (30.2-36.4) | 32.6 (29.5-35.8) | 21.4 (18.8-24.4) | 30.6 (27.6-33.8) |
| Slovakia       | 50.1 (46.7-53.5) | 58.5 (55.4-61.5) | 39.0 (35.8-42.3) | 43.2 (39.9-46.5) | 49.0 (45.8-52.3) |



|                 |                         |                         |                         |                         |                         |
|-----------------|-------------------------|-------------------------|-------------------------|-------------------------|-------------------------|
| <b>Slovenia</b> | 62.1 (58.9-65.2)        | 66.7 (63.7-69.7)        | 68.9 (65.9-71.8)        | 71.0 (68.1-73.8)        | 68.7 (65.7-71.5)        |
| <b>Bulgaria</b> | 23.3 (20.6-26.1)        | 25.9 (23.1-28.8)        | 28.6 (25.8-31.5)        | 22.3 (19.7-25.1)        | 29.2 (26.3-32.2)        |
| <b>Romania</b>  | 26.4 (23.6-29.4)        | 17.1 (14.8-19.6)        | 13.0 (11.1-15.2)        | 19.1 (16.7-21.8)        | 26.6 (23.9-29.5)        |
| <b>Overall</b>  | <b>64.9 (64.0-65.8)</b> | <b>64.9 (64.0-65.8)</b> | <b>62.9 (62.0-63.8)</b> | <b>63.3 (62.4-64.2)</b> | <b>64.0 (63.1-64.9)</b> |

Notes: Weighted percentages were included in the table (special weights were used for Germany and the UK respectively); All values rounded to one decimal place; values in parentheses indicate 95% confidence intervals.

For peer review only

STROBE Statement—Checklist of items that should be included in reports of *cross-sectional studies*

|                              | Item No | Recommendation                                                                                                                                                                                    | Reported on page |
|------------------------------|---------|---------------------------------------------------------------------------------------------------------------------------------------------------------------------------------------------------|------------------|
| <b>Title and abstract</b>    | 1       | (a) Indicate the study's design with a commonly used term in the title or the abstract                                                                                                            | 2                |
|                              |         | (b) Provide in the abstract an informative and balanced summary of what was done and what was found                                                                                               | 2                |
| <b>Introduction</b>          |         |                                                                                                                                                                                                   |                  |
| Background/rationale         | 2       | Explain the scientific background and rationale for the investigation being reported                                                                                                              | 4                |
| Objectives                   | 3       | State specific objectives, including any prespecified hypotheses                                                                                                                                  | 5                |
| <b>Methods</b>               |         |                                                                                                                                                                                                   |                  |
| Study design                 | 4       | Present key elements of study design early in the paper                                                                                                                                           | 6, 7             |
| Setting                      | 5       | Describe the setting, locations, and relevant dates, including periods of recruitment, exposure, follow-up, and data collection                                                                   | 6, 7             |
| Participants                 | 6       | (a) Give the eligibility criteria, and the sources and methods of selection of participants                                                                                                       | 6, 7             |
| Variables                    | 7       | Clearly define all outcomes, exposures, predictors, potential confounders, and effect modifiers. Give diagnostic criteria, if applicable                                                          | 6-8              |
| Data sources/<br>measurement | 8*      | For each variable of interest, give sources of data and details of methods of assessment (measurement). Describe comparability of assessment methods if there is more than one group              | 6-8              |
| Bias                         | 9       | Describe any efforts to address potential sources of bias                                                                                                                                         | 8-9              |
| Study size                   | 10      | Explain how the study size was arrived at                                                                                                                                                         | 6                |
| Quantitative variables       | 11      | Explain how quantitative variables were handled in the analyses. If applicable, describe which groupings were chosen and why                                                                      | 7-9              |
| Statistical methods          | 12      | (a) Describe all statistical methods, including those used to control for confounding                                                                                                             | 8-9              |
|                              |         | (b) Describe any methods used to examine subgroups and interactions                                                                                                                               | 8-9              |
|                              |         | (c) Explain how missing data were addressed                                                                                                                                                       | 8                |
|                              |         | (d) If applicable, describe analytical methods taking account of sampling strategy                                                                                                                | 8                |
|                              |         | (e) Describe any sensitivity analyses                                                                                                                                                             | 9                |
| <b>Results</b>               |         |                                                                                                                                                                                                   |                  |
| Participants                 | 13*     | (a) Report numbers of individuals at each stage of study—eg numbers potentially eligible, examined for eligibility, confirmed eligible, included in the study, completing follow-up, and analysed | n/a              |
|                              |         | (b) Give reasons for non-participation at each stage                                                                                                                                              | n/a              |
|                              |         | (c) Consider use of a flow diagram                                                                                                                                                                | n/a              |
| Descriptive data             | 14*     | (a) Give characteristics of study participants (eg demographic, clinical, social) and information on exposures and potential confounders                                                          | Sup.<br>Table 1  |
|                              |         | (b) Indicate number of participants with missing data for each variable of interest                                                                                                               | Sup.<br>Table 1  |
| Outcome data                 | 15*     | Report numbers of outcome events or summary measures                                                                                                                                              | n/a              |
| Main results                 | 16      | (a) Give unadjusted estimates and, if applicable, confounder-adjusted estimates and their precision (eg, 95% confidence interval). Make clear                                                     | Tables 2         |

|                          |    |                                                                                                                                                                            |       |
|--------------------------|----|----------------------------------------------------------------------------------------------------------------------------------------------------------------------------|-------|
|                          |    | which confounders were adjusted for and why they were included                                                                                                             |       |
|                          |    | (b) Report category boundaries when continuous variables were categorized                                                                                                  | 7-8   |
|                          |    | (c) If relevant, consider translating estimates of relative risk into absolute risk for a meaningful time period                                                           | n/a   |
| Other analyses           | 17 | Report other analyses done—eg analyses of subgroups and interactions, and sensitivity analyses                                                                             | 12    |
| <b>Discussion</b>        |    |                                                                                                                                                                            |       |
| Key results              | 18 | Summarise key results with reference to study objectives                                                                                                                   | 13    |
| Limitations              | 19 | Discuss limitations of the study, taking into account sources of potential bias or imprecision. Discuss both direction and magnitude of any potential bias                 | 14-15 |
| Interpretation           | 20 | Give a cautious overall interpretation of results considering objectives, limitations, multiplicity of analyses, results from similar studies, and other relevant evidence | 15-16 |
| Generalisability         | 21 | Discuss the generalisability (external validity) of the study results                                                                                                      | 15    |
| <b>Other information</b> |    |                                                                                                                                                                            |       |
| Funding                  | 22 | Give the source of funding and the role of the funders for the present study and, if applicable, for the original study on which the present article is based              | 1     |

\*Give information separately for exposed and unexposed groups.

**Note:** An Explanation and Elaboration article discusses each checklist item and gives methodological background and published examples of transparent reporting. The STROBE checklist is best used in conjunction with this article (freely available on the Web sites of PLoS Medicine at <http://www.plosmedicine.org/>, Annals of Internal Medicine at <http://www.annals.org/>, and Epidemiology at <http://www.epidem.com/>). Information on the STROBE Initiative is available at [www.strobe-statement.org](http://www.strobe-statement.org).
